# Supplementary material for: Hypoxia-Induced miR-148a Downregulation Contributes to Poor Survival in Colorectal Cancer
Source: Front Genet. 2021 May 31;12:662468. doi: 10.3389/fgene.2021.662468 (PMC8202010; doi:10.3389/fgene.2021.662468)
Supplement: Supplementary Table 1 — The results of differential gene expression analysis. [file Table_1.xlsx]

## Sheet: Summary
Number of differentially expressed genes in each condition
	CoCl2	Oxyquinoline
Caco-2	1928	859
HT-29	3629	1486

## Sheet: Caco-2, CoCl2
Gene	baseMean	log2FoldChange	lfcSE	svalue
ABCC3	4522.25	-1.60711	0.066389	0
ACADM	471.412	-1.69715	0.125866	0
ACCS	312.554	-1.81755	0.142533	0
ADAM22	750.229	-1.61805	0.0980172	0
ADGRG1	2131.17	-1.38941	0.0837657	0
ADH4	483.054	-3.15148	0.137835	0
AGMAT	613.252	-1.86712	0.10755	0
ALDH1B1	364.766	-2.00959	0.138258	0
APELA	180.646	-3.0299	0.199575	0
APOB	36943.5	-1.86949	0.0716465	0
ARHGEF17	1712.43	-1.43069	0.0933087	0
ARPIN	536.167	-1.51574	0.108019	0
ATP5MC1	1041.53	-1.85846	0.0886279	0
BCAS1	639.05	-1.54174	0.113815	0
BDH2	407.484	-1.63226	0.123107	0
BNIP3	4077.83	3.58889	0.0700629	0
C1RL	605.771	-2.13847	0.109335	0
C2orf72	3838.13	-1.57356	0.0647015	0
CACNA1D	925.761	-1.79696	0.0923462	0
CFTR	3521.88	-2.35346	0.0907397	0
CHST3	2230.3	-1.93803	0.0716634	0
COL2A1	1290.29	-1.56563	0.10546	0
COL4A5	501.23	-1.70817	0.116537	0
CPM	605.268	-2.19331	0.106643	0
DARS2	800.26	-1.53274	0.0977365	0
DEFB1	241.056	-2.17238	0.161051	0
DGAT1	1754.41	-1.35833	0.0793612	0
DGAT2	2955.21	-1.38857	0.0644958	0
EGFR	2040.96	-1.22751	0.0682768	0
EHHADH	487.403	-1.69507	0.119857	0
EMP1	3722.77	3.47777	0.0752615	0
ENO2	3016.41	4.42151	0.0885063	0
ENOSF1	1151.45	-1.561	0.0960693	0
ERBB3	6995.11	-1.30732	0.0627389	0
ERVMER34-1	364.046	-2.64635	0.147291	0
F7	786.52	-2.15951	0.112102	0
FGA	2528.59	-1.55995	0.0769409	0
FGFR2	2507.56	-1.33837	0.0683753	0
FGG	7885.98	-1.49503	0.0722725	0
FOXA1	1689.37	-1.57896	0.0795665	0
FRAS1	4492.15	-1.40296	0.0774711	0
FREM2	972.826	-1.90362	0.0996392	0
G0S2	327.507	-1.9936	0.16126	0
GALNT5	906.214	-1.94839	0.0936527	0
GLYCTK	1393.54	-1.88671	0.0979911	0
GPAM	1773.21	-1.95319	0.0844283	0
GPD1	183.967	-2.46797	0.194602	0
GPRC5A	13499.9	3.84464	0.0655164	0
HEPACAM2	2004.72	-2.8152	0.0913169	0
HK2	3047.63	3.57105	0.0716677	0
HMGCS2	2038.56	-1.43457	0.0811725	0
HMOX1	4705.31	5.12607	0.0887553	0
HSD3B1	280.527	-2.52159	0.167622	0
INTS3	1154.03	-1.29286	0.0827669	0
IRS1	1164.86	-1.41263	0.0856416	0
ITPR2	860.785	-1.81239	0.110272	0
KAZALD1	451.645	-1.82334	0.117205	0
KIF12	1044.97	-1.67688	0.0942676	0
KLB	985.809	-1.54161	0.0963976	0
KLHL13	737.223	-1.71648	0.10333	0
KNG1	2296.2	-1.39416	0.0738688	0
LACTB2	567.862	-1.7329	0.115645	0
LDHA	30048	2.75562	0.0564905	0
LDHD	523.559	-2.45402	0.147516	0
LGR5	269.284	-2.08192	0.153038	0
MALRD1	983.706	-1.96744	0.111855	0
MECOM	647.797	-1.64799	0.106653	0
MOCS1	393.637	-1.67584	0.120877	0
MYO1D	3675.09	-1.14992	0.0664442	0
NAGLU	290.371	-2.17898	0.151962	0
NR2F2	1614.43	-1.475	0.0805878	0
OAT	9416.78	-1.98758	0.0597235	0
ORM1	542.581	-1.69771	0.116919	0
P4HA1	8925.7	3.08672	0.0614498	0
PADI2	293.687	-2.25274	0.146553	0
PBLD	2421.73	-1.17821	0.0679223	0
PCK2	836.218	-1.69205	0.110043	0
PDE3B	448.434	-1.85061	0.131428	0
PDGFRB	421.377	-4.07335	0.16723	0
PEG10	24964.1	-1.51982	0.055642	0
PHYH	2017.02	-1.26639	0.0699206	0
PKDCC	3056.93	-1.77191	0.0733863	0
PLEKHG2	451.527	-1.63844	0.116442	0
PLEKHG4	1328.58	-1.77241	0.0818091	0
POFUT1	3544.15	-1.55479	0.0712873	0
PSPH	601.636	-1.49771	0.104013	0
RAB37	912.958	-1.59126	0.0887535	0
RBM15B	741.403	-1.44156	0.100264	0
RHOBTB2	348.911	-1.82253	0.132125	0
RPS6KA3	4454.5	-1.54298	0.0882521	0
SCGN	730.022	-1.86184	0.100787	0
SCRN2	1320.93	-1.68058	0.097593	0
SEPHS2	3190.01	-1.12953	0.0633886	0
SERPINA10	697.928	-1.54862	0.104247	0
SERPINA4	330.29	-1.7711	0.13937	0
SKP2	2222.47	-1.19504	0.0734995	0
SLC10A1	145.932	-2.5195	0.20908	0
SLC12A2	671.558	-1.97409	0.114325	0
SLC22A9	362.105	-2.37439	0.155948	0
SLC29A4	540.332	-1.6286	0.122073	0
SLC2A1	12808.8	3.21384	0.0685085	0
SLC2A3	46978.4	4.15562	0.0622085	0
SLC38A3	593.385	-2.20933	0.128962	0
SLC38A4	780.626	-2.88056	0.109471	0
SLC43A1	848.475	-1.71085	0.0977528	0
SLC5A6	1136.17	-1.80604	0.0869279	0
SLC7A2	2240.32	-2.12552	0.0805573	0
SMPD1	329.975	-2.04055	0.150942	0
SPTLC3	2089.9	-1.74931	0.0868832	0
SPTSSB	741.416	-1.66477	0.107839	0
STEAP3	191.921	-2.17717	0.189022	0
SULT2A1	289.758	-2.13543	0.159149	0
SUOX	355.732	-1.76481	0.130279	0
TASOR	819.847	-1.60583	0.0929115	0
TBC1D16	1311.76	-1.27747	0.0802228	0
TGM2	1016.99	-2.25541	0.0940556	0
TM4SF20	443.171	-1.5778	0.118966	0
TM7SF2	758.036	-2.01032	0.117823	0
TMEM185B	844.754	-1.38324	0.0912741	0
TST	375.704	-2.35506	0.163943	0
UGT2B15	119.88	-3.32254	0.269139	0
UGT2B17	253.627	-2.47862	0.205455	0
ZNF512B	372.384	-2.09178	0.137075	0
HSPA1A	2550.91	3.16436	0.0730428	1.10411e-275
GAPDH	64602.3	2.74922	0.06146	3.77711e-274
PFKFB4	2227.92	3.97386	0.10013	1.28814e-253
PGK1	17866.4	2.35469	0.053309	3.47497e-244
NDRG1	17531.6	2.87231	0.0693536	4.50497e-241
PDK1	1961.07	3.34638	0.0903386	9.78075e-208
ERO1A	5895.03	2.76586	0.072542	4.19876e-201
CKB	30437.8	3.23951	0.0899844	8.33506e-194
ENO1	26713.3	2.41607	0.063766	6.94796e-184
BHLHE40	2032.58	3.14663	0.0898125	1.78252e-181
TXNRD1	5273.5	2.43797	0.0663243	2.58891e-174
MT1F	1117.01	4.09347	0.125664	6.93049e-174
SLC6A8	1420.44	3.77003	0.114763	4.55384e-172
SAT1	5833.81	2.44358	0.0675992	5.72116e-169
GABARAPL1	4067.96	2.32927	0.0642119	4.71488e-165
KLF6	3093	2.48034	0.0701076	1.62556e-163
PFKFB3	2343	2.79802	0.0842746	1.51355e-154
SLC2A14	1402.69	3.10792	0.0967764	2.20882e-152
ITGA5	637.321	4.17656	0.138474	7.1871e-151
FOS	647.682	4.23595	0.141451	1.88701e-149
MAFF	677.641	3.97292	0.132173	1.79924e-147
FAM13A	2582.55	2.51706	0.0759568	2.67664e-145
BNIP3L	2526.66	2.64108	0.081217	5.90252e-144
HILPDA	831.512	3.32771	0.110153	2.009e-139
GPX3	4065.68	2.28711	0.0684201	5.41561e-139
UFD1	2417.79	2.43512	0.0754751	2.79199e-135
ADM	812.52	3.48029	0.119217	7.21304e-133
FUT11	751.916	3.23306	0.109142	1.97763e-132
DDIT4	933.748	3.85082	0.13594	4.04613e-130
GPI	8428.23	2.22022	0.0684778	2.44585e-128
TFAP2C	674.842	3.34741	0.116059	1.05341e-127
GDF15	774.432	3.78755	0.135913	2.32336e-125
PPP1R15A	3409.39	2.35827	0.0759653	4.06171e-123
EFNA1	4889.92	2.36847	0.0767295	4.50905e-122
SQSTM1	5685.68	2.40902	0.0786855	2.19609e-121
SLC20A1	3431.4	2.20452	0.0698798	4.14918e-121
PLIN2	3016.31	2.20867	0.0701635	8.48181e-121
UBC	25607.2	2.0972	0.066048	1.26279e-118
CLDN4	10247	2.33778	0.0766637	3.86887e-118
ZFAND2A	895.364	2.91615	0.102318	2.00273e-117
P4HA2	2358.13	2.30187	0.0754455	4.9696e-117
TMCC1	2109.85	2.36077	0.0789164	9.53695e-115
DUSP5	1045.71	2.78169	0.0991678	2.41741e-111
JUN	870.449	3.17696	0.117826	7.35186e-110
PLOD2	4794.37	2.42538	0.0845065	8.91275e-108
KDM3A	5385.54	2.19649	0.074762	1.12529e-105
OSGIN1	1044.65	3.1022	0.116878	2.76211e-105
GPX2	846.818	2.76466	0.101561	1.10285e-104
PFKP	1518.51	2.93857	0.109759	2.32815e-104
GLA	1245.34	2.38842	0.0860251	3.23322e-100
ZFP36	1550.98	2.52807	0.0930105	1.80917e-99
PKM	14596.3	1.88353	0.0622202	4.08713e-99
FTL	85637.1	1.93061	0.0648365	2.96399e-98
LDLR	4911.01	2.06591	0.0734673	5.23481e-93
ATP8B2	672.174	3.36365	0.138419	3.323e-92
TMBIM1	8893.55	1.82061	0.0619975	5.33212e-91
SLC16A3	527.042	3.53311	0.14856	3.2807e-90
RIOK3	1841.04	2.36516	0.0902306	3.03206e-89
OSER1	3217.11	1.9127	0.0674273	8.71609e-89
GCNT3	657.276	3.23546	0.135187	3.90892e-88
MPZL3	2991.95	1.90743	0.0676776	1.48564e-87
HSPA1B	1103.78	2.40677	0.0937122	9.2049e-87
DUSP1	608.322	2.93715	0.121134	2.1051e-86
INSIG2	1328.17	2.52173	0.0999647	4.85979e-86
GADD45A	740.371	2.61507	0.106782	2.96441e-83
MAFG	1487.06	2.05195	0.0777916	5.74042e-82
NAA25	2246.62	2.06171	0.0784303	1.514e-81
LOX	494.747	2.90324	0.125189	3.15723e-79
AKR1C2	3802.78	1.78263	0.0647545	7.91363e-79
CITED2	1534.33	2.08705	0.0823729	5.82501e-77
PSMC4	3165.46	1.7951	0.0667406	4.34252e-76
SORL1	8063.84	1.76702	0.065331	1.18836e-75
GCLC	1642.97	1.99928	0.0785449	4.81213e-75
F2RL1	5889.15	1.8246	0.0691845	2.26285e-74
MPZL2	6169.27	1.68526	0.0628017	3.1906e-71
TM4SF1	2789.97	2.08131	0.085897	1.50992e-70
PIR	460.808	2.87189	0.131456	3.28749e-70
ANKRD37	265.035	5.47347	0.282545	1.25977e-69
FOSL1	243.389	5.15158	0.265896	9.64245e-69
FAM219A	662.666	2.72561	0.124898	2.49454e-68
EPHA2	850.251	2.4079	0.106967	1.05479e-67
RIMKLA	1096.46	2.12014	0.0905809	5.03707e-67
MT2A	3309.61	6.83692	0.369285	1.04326e-66
STC2	3356.24	1.86103	0.0757661	3.42223e-66
ELF3	3510.04	2.00211	0.0850417	5.08103e-65
OPTN	3606.11	1.61209	0.0616467	9.98793e-65
UCHL1	811.322	2.38814	0.108758	2.91575e-64
AIFM2	1089.25	2.10163	0.0915884	5.58201e-64
GLRX	1599.75	1.89251	0.0792759	1.35272e-63
GCLM	461.499	2.599	0.122601	3.70932e-63
STYK1	232.134	4.20523	0.220639	6.93738e-63
AKAP7	2641.57	1.72963	0.0697751	1.03027e-62
ABCC2	11651.4	1.51049	0.0566204	1.91707e-62
ANKZF1	2317.84	1.75449	0.0715969	2.97842e-62
H2BC21	653	2.33174	0.107791	1.17964e-61
PPME1	2226.12	1.72494	0.0710988	1.53142e-60
MT1X	1156.53	6.45898	0.367469	4.60034e-60
ALDOA	368.208	3.5415	0.185449	1.06319e-59
RND3	1342.97	2.0362	0.0915671	3.74839e-59
CCL20	209.893	4.0144	0.216444	6.60934e-59
ALDOC	2068.6	1.79473	0.0764122	1.00666e-58
TPI1	15474	1.62598	0.0658596	1.52418e-58
CRKL	3339.16	1.63664	0.0665702	2.11258e-58
EIF1	7107.99	1.6109	0.0652131	3.78717e-58
UGDH	4424.44	1.60279	0.0647102	5.53116e-58
ME1	3251.95	1.8955	0.083766	1.20715e-57
CLIC5	2237.75	1.75672	0.0751334	2.62309e-57
TMEM92	1805.74	1.89362	0.0842738	6.64777e-57
RHPN2	2024.17	1.84759	0.0815419	1.4631e-56
JMJD6	904.783	2.14643	0.10093	2.44377e-56
DUSP6	480.957	2.4195	0.118589	3.43348e-56
CEACAM1	1223.73	1.82833	0.0814125	2.43364e-55
TINAGL1	895.746	2.07203	0.0979721	1.11974e-54
KLHL21	1044.17	1.86616	0.0851517	7.64083e-54
RFFL	780.936	2.04532	0.0973505	2.04347e-53
MXI1	1211.58	1.81898	0.0826643	5.86091e-53
MXD1	956.96	2.15225	0.105118	1.08478e-52
KDM5B	4012.48	1.53459	0.0638871	2.07006e-52
VCP	8344.53	1.4373	0.0580602	1.95726e-51
ATF3	286.375	2.86768	0.155834	4.34667e-51
MRPS26	1830.09	2.02741	0.0988819	1.0163e-50
PSMD13	3531.22	1.52177	0.0647412	5.34366e-50
FAM162A	2723.62	1.55616	0.0674681	1.48683e-49
CYP2S1	1724.86	1.68106	0.0763982	3.37682e-49
APOL2	779.734	2.0071	0.0991946	5.55487e-49
IL6R	1063.18	1.80275	0.086159	4.51599e-48
PSMD11	3917.85	1.44763	0.0613681	1.62546e-47
TNIP1	3059.94	1.73197	0.0817279	3.23488e-47
PELO	858.827	1.93715	0.0968714	7.9009e-47
TNFRSF10B	3082.91	1.53327	0.0688739	7.3646e-46
FXYD5	451.157	2.28204	0.123744	2.12044e-45
CIART	253.607	2.86168	0.166815	5.55134e-45
TSC22D2	1352.44	1.76156	0.0870858	2.78967e-44
GBE1	399.415	2.3904	0.134694	1.22392e-43
LGALS14	1900.96	2.04581	0.109239	5.01457e-43
SPAG4	370.891	2.65964	0.156905	1.78893e-42
PIM1	1535.59	1.70299	0.08458	2.89181e-42
DNAJC2	1858.83	1.81111	0.092766	4.00258e-42
SPAG9	6569.66	1.50171	0.0694723	5.47835e-42
RNF24	842.401	1.78806	0.0911721	6.94525e-42
LGI4	1068.82	2.21872	0.12384	8.47219e-42
SLC36A1	4121.34	1.49056	0.0688647	1.11406e-41
CCL28	648.342	1.92961	0.102253	1.37994e-41
TRIB1	826.954	1.85453	0.0970256	2.01123e-41
ABHD4	1876.48	1.52774	0.0725066	3.87019e-41
HSPA13	878.548	1.88876	0.101748	2.53731e-40
NPC1	1559.68	1.61896	0.0808678	5.59448e-40
SLC11A2	5898.42	1.51367	0.0733801	2.17492e-39
UBE2O	1330.28	1.68438	0.0868799	3.81511e-39
VEGFA	5208.27	1.39451	0.0641832	6.58335e-39
HSPA8	50820.7	1.31295	0.058132	1.52124e-38
OSBPL2	4135.17	1.37084	0.0629685	2.98779e-38
LNPK	1065.35	1.81553	0.0986188	4.49224e-38
WDR45B	2279.82	1.52104	0.0750379	6.05209e-38
KCMF1	1734.42	1.65239	0.0857473	8.21058e-38
FAM241B	308.637	2.4098	0.146745	1.07443e-37
HKDC1	864.203	1.7682	0.095388	1.44674e-37
SERPINB6	1624.86	1.54122	0.077456	2.21959e-37
ITGA2	1013.88	1.7833	0.0971841	3.14897e-37
ARHGAP45	576.438	2.23917	0.134267	4.2003e-37
UNKL	519.659	2.02073	0.1181	1.38753e-36
HSP90AB1	35731.4	1.34108	0.0621969	2.17051e-36
GSR	2514.23	1.397	0.0672137	4.135e-36
FLNA	7423.9	1.44119	0.071278	8.65607e-36
ARRDC3	1026.46	1.6541	0.0896242	3.27344e-35
SLC2A5	519.868	2.25118	0.140255	5.4774e-35
ANKRD1	723.622	1.84188	0.106357	1.00877e-34
BLCAP	4700.1	1.35353	0.0653173	1.85277e-34
ZFAND5	909.346	1.83436	0.106872	3.92468e-34
BAG3	1062.67	1.59102	0.0860932	6.10534e-34
ACTG1	23588.9	1.32067	0.0631094	9.12925e-34
TNFRSF10D	848.274	1.6993	0.0960059	1.45917e-33
IMPAD1	1777.39	1.56384	0.084508	2.17733e-33
ABCC1	612.902	1.88613	0.112909	3.60536e-33
LRP4	1074.93	1.64704	0.0924179	5.66453e-33
MED15	1511.44	1.55527	0.0846213	8.42663e-33
CLK3	1398.93	1.4784	0.0779888	1.15305e-32
RBM33	3054.62	1.40463	0.0718954	2.10319e-32
PLEKHA2	555.237	1.87289	0.113431	4.07848e-32
RNMT	2515.99	1.40032	0.0726831	8.73798e-32
PSMD14	1842.3	1.53689	0.0850185	1.46408e-31
TMSB10	7097.52	1.63052	0.0933823	2.05183e-31
GPAT3	483.951	1.93484	0.120879	2.86833e-31
ZDHHC9	3339.73	1.28869	0.0630749	3.779e-31
DNAJB1	2563.41	1.31171	0.0652531	4.9122e-31
PSMB2	2292.16	1.36242	0.0699181	6.29012e-31
EFNA3	145.402	3.13679	0.229991	8.09383e-31
RASSF1	468.029	1.92787	0.121179	1.01799e-30
LARP4B	4245.86	1.2962	0.0642035	1.23512e-30
LGALS8	1620.11	1.56141	0.0890505	2.55672e-30
PRPF3	1411.54	1.43044	0.0772741	4.40747e-30
NAMPT	2637.1	1.61765	0.0944299	6.45141e-30
H2BC9	394.861	1.99778	0.129735	8.16146e-30
PIM3	701.063	1.90076	0.121219	1.06787e-29
PSMD2	4285.46	1.26463	0.0627667	1.40251e-29
ZSWIM6	744.818	1.72389	0.105549	2.27915e-29
KRT18	11747.1	1.35481	0.0718075	3.34951e-29
TMEM159	443.754	1.89707	0.122471	4.50258e-29
RHOB	539.992	1.73504	0.107413	5.73533e-29
WASF2	2933.05	1.25746	0.0632273	8.38057e-29
ZNF280A	105.846	3.48976	0.273397	1.13565e-28
PAG1	3565.23	1.41728	0.0786155	1.57964e-28
SOCS3	309.535	2.13361	0.147071	2.39606e-28
BNIP5	209.664	2.38287	0.171205	3.49698e-28
CREM	334.693	1.98613	0.133472	4.63559e-28
GALNT3	2335.81	1.38399	0.0782515	3.61541e-27
RIT1	1163.4	1.55467	0.0950418	6.07687e-27
TMSB4X	1202.26	1.47588	0.0873819	8.71973e-27
DPCD	228.633	2.24318	0.162754	1.15529e-26
YEATS2	1812.39	1.30699	0.0709775	1.48744e-26
NPLOC4	3426.1	1.2351	0.0639994	1.87035e-26
RNF4	1538.09	1.36723	0.0770294	2.26338e-26
HSPB8	306.505	2.12123	0.151366	2.67996e-26
ID1	174.51	2.56531	0.196621	3.60174e-26
CHMP4B	6029.93	1.27972	0.0691183	4.7303e-26
GUK1	984.068	1.48189	0.089303	5.95013e-26
LIN54	845.707	1.51804	0.093048	7.37497e-26
FSTL3	1198.88	1.52796	0.0941751	9.02255e-26
TRIB3	2736.7	1.42048	0.0834931	1.077e-25
INSIG1	5210.74	1.45427	0.0869754	1.274e-25
RAB20	583.801	1.76702	0.118315	1.47836e-25
ZNF562	861.507	1.56897	0.09866	1.72051e-25
FAM160A1	1052.04	1.6034	0.10225	1.9969e-25
KDM4B	901.217	1.51663	0.0937609	2.9497e-25
LGALS3	15261	1.1414	0.056458	3.73301e-25
BMP2	1004.99	1.4219	0.0849594	4.55109e-25
JUNB	282.891	2.20333	0.164444	5.44832e-25
NCBP2	2552.89	1.23048	0.0659569	9.22319e-25
MAPRE3	260.211	2.10015	0.155059	1.09957e-24
ADRM1	1600.55	1.59635	0.104423	1.71542e-24
IFRD1	1076.12	1.43732	0.0880835	2.60691e-24
DAP3	3864.5	1.21384	0.0656209	4.25331e-24
CYTH1	1347.3	1.31435	0.0761731	5.44487e-24
DDX41	2112.04	1.40148	0.0859071	7.80522e-24
PSMD3	3398.86	1.29941	0.0752338	1.03499e-23
HSP90AA1	19623.1	1.22599	0.0676221	1.58845e-23
ORC1	384.888	1.7569	0.123772	1.91706e-23
TGFB1	316.519	2.02416	0.152502	2.35973e-23
SETD5	4200.56	1.18256	0.0633836	3.27895e-23
VDAC2	1563.48	1.57006	0.104999	4.02261e-23
DNAJB9	733.973	1.64789	0.113393	4.82303e-23
GOLGA8A	713.724	1.48903	0.0966169	5.75688e-23
IL2RG	460.451	1.69587	0.118905	6.82369e-23
NFKB2	530.969	1.73967	0.124129	9.72928e-23
MAP1LC3B	2069.53	1.38899	0.0866521	1.16689e-22
UBR4	8232.56	1.17603	0.063978	1.4492e-22
PGM1	1279.67	1.34935	0.0828934	1.77999e-22
SLC15A1	650.673	1.5529	0.105368	2.61224e-22
AREG	662.42	1.5206	0.101985	3.1208e-22
STON2	394.748	1.74711	0.126797	3.67077e-22
DEDD2	808.832	1.59378	0.110105	4.23475e-22
SOD1	3356.77	1.21781	0.0694308	5.11085e-22
BSDC1	1434.38	1.3029	0.0788729	6.08882e-22
AKR1C1	5046.42	1.26001	0.0741718	7.07455e-22
USP14	4025	1.35775	0.0849892	8.13629e-22
NFE2L1	13507.3	1.09063	0.0556753	9.30028e-22
CCND1	2311.06	1.24005	0.0728011	1.18266e-21
SLC30A1	2516.85	1.41692	0.0925156	1.44776e-21
NNAT	217.746	2.02697	0.161102	2.1519e-21
LBH	1157.17	1.35201	0.0860609	2.69488e-21
GTPBP4	2925.7	1.18176	0.0669905	3.25676e-21
HBP1	1589.32	1.36782	0.0879259	3.84268e-21
BACH1	2245.47	1.37428	0.0888031	4.51273e-21
PVR	3392.86	1.17137	0.0662579	5.45563e-21
ERRFI1	708.921	1.54591	0.108722	6.49987e-21
PREP	1618.81	1.257	0.076115	7.63179e-21
TSPYL2	708.586	1.42917	0.0957947	1.02419e-20
POFUT2	981.772	1.36554	0.0886104	1.15818e-20
PLEKHM3	1061.85	1.33979	0.0857706	1.30244e-20
FBL	3187.73	1.3182	0.0833758	1.45427e-20
LAMC2	4852.17	1.12885	0.0621492	1.6774e-20
VEZT	2168.08	1.29513	0.0812497	1.92226e-20
BCL10	467.229	1.71704	0.129697	2.19366e-20
TIPARP	670.175	1.58816	0.115504	2.59143e-20
MYADM	831.452	1.50709	0.10663	3.14386e-20
HELZ	2779.09	1.3076	0.0836263	3.7275e-20
EIF4A2	24006.6	1.14844	0.0653064	4.37937e-20
FGD6	1466.33	1.30424	0.0839401	5.47464e-20
KCNK6	469.392	1.58389	0.116636	6.60824e-20
ZNF823	464.068	1.63858	0.123452	8.07482e-20
SELENOK	874.573	1.46032	0.102671	9.65047e-20
RCOR1	1198.87	1.25699	0.0788992	1.1338e-19
DNTTIP2	968.637	1.50918	0.108572	1.3095e-19
YWHAG	4215.44	1.16308	0.067946	1.49072e-19
UBQLN1	1812.23	1.3173	0.0862108	1.69425e-19
ASPH	5852.98	1.08394	0.0587598	1.90224e-19
PHF1	894.266	1.39516	0.0954953	2.12368e-19
MAP3K8	441.183	1.68723	0.130114	2.36984e-19
SENP5	1086.19	1.3324	0.089662	4.45215e-19
MCL1	3263.86	1.15706	0.0689804	7.38825e-19
NFIL3	753.2	1.46409	0.106057	8.53668e-19
NABP1	731.377	-1.50942	0.111737	1.654e-18
GLUD1	10741.6	-1.17997	0.0723395	2.53246e-18
PGAM1	641.998	1.47766	0.109119	3.242e-18
PLEKHA5	984.358	-1.33958	0.0931132	4.10807e-18
ZNF780B	381.448	-1.64266	0.130302	4.54049e-18
BRF2	232.747	1.89375	0.161462	5.49743e-18
BCL2L1	4322.63	1.18069	0.0736564	6.62515e-18
ADAM23	957.488	-1.27799	0.0859066	7.26649e-18
PRKCA	770.119	-1.37246	0.0974514	8.54164e-18
MID1IP1	266.161	-1.81132	0.1518	9.17548e-18
TNFRSF21	1042.14	1.28271	0.0866091	9.92428e-18
PLAC8	290.397	1.847	0.156658	1.06715e-17
SLC3A2	5364.74	1.11113	0.0653162	1.14177e-17
SEC24A	3683.8	1.32155	0.0915121	1.29852e-17
PHYKPL	725.733	-1.46905	0.110057	1.46465e-17
SIGMAR1	1177.48	-1.42049	0.104177	1.66207e-17
MINPP1	438.265	-1.70375	0.139563	1.76523e-17
GSAP	508.756	-1.46835	0.110486	1.99298e-17
FADS1	2484.79	-1.1578	0.071711	2.11607e-17
CCNB1IP1	2450.9	1.13932	0.0694616	2.37235e-17
C4orf3	2112.97	1.21423	0.0788857	2.50991e-17
LAMA1	641.707	-1.45078	0.108685	2.79371e-17
UGP2	3917.28	1.20684	0.0780219	2.93721e-17
HK1	374.39	1.66665	0.13576	3.08367e-17
RARRES1	206.403	-2.02294	0.180735	3.24452e-17
ADH6	270.467	-1.81626	0.154705	3.40477e-17
ABHD15	215.37	-1.87052	0.161683	3.56442e-17
RAB11FIP5	1048.84	1.2715	0.0863017	3.72475e-17
CTH	288.109	1.8037	0.153835	4.1338e-17
CDT1	682.354	1.47497	0.112638	4.82696e-17
EZR	8619.41	1.03319	0.0567591	5.08151e-17
GADD45B	153.779	2.15595	0.198941	5.33572e-17
NRBP2	266.774	-1.76753	0.14985	5.59122e-17
REG4	190.144	-1.94783	0.172785	5.86616e-17
STK24	2673.89	1.15707	0.0725448	6.14044e-17
BLMH	955.903	1.32553	0.0939686	6.42598e-17
NSFL1C	2036.55	1.16481	0.0738382	6.78502e-17
RELA	1357.4	1.22914	0.0821716	7.18491e-17
SLC7A11	535.521	1.61448	0.132048	8.72795e-17
SERPINA6	397.537	-1.60137	0.130371	9.29438e-17
TRAPPC6A	346.584	-1.66028	0.13802	9.87881e-17
ACAD10	633.789	-1.41318	0.106343	1.04811e-16
TAX1BP1	4531.75	1.21003	0.080346	1.1116e-16
ARL15	955.463	-1.42222	0.107687	1.17737e-16
KRT19	11442.4	1.23061	0.0830943	1.24556e-16
AQP10	449.62	3.83359	0.418518	1.38714e-16
LRRC1	1139.45	1.25042	0.0857432	1.45973e-16
AGFG2	511.581	-1.43187	0.109391	1.54405e-16
SUCO	1961.9	1.32303	0.0954245	1.63348e-16
C11orf95	833.204	-1.31121	0.0940479	1.73295e-16
RAPGEFL1	669.104	-1.37887	0.102823	1.83206e-16
ZNF581	948.735	1.43511	0.110364	1.94611e-16
MAT1A	433.362	-1.50041	0.11903	2.07191e-16
CALCOCO2	8105.76	1.00995	0.0552637	2.19755e-16
CCDC183	294.692	1.87119	0.167636	2.34165e-16
CAD	1482.47	-1.21138	0.081734	2.49531e-16
DCBLD2	693.243	-1.36642	0.102064	2.82e-16
SDCBP	1130.73	1.33543	0.0980928	2.98972e-16
CDR2	1036.21	1.34683	0.0997665	3.17899e-16
ABCC6	621.342	-1.40474	0.107374	3.37041e-16
TACSTD2	394.088	1.60901	0.134186	3.56589e-16
NQO1	2733.49	1.11658	0.0697241	3.77189e-16
EIF2A	3834.15	1.22116	0.0835362	3.9921e-16
CYP2C9	157.97	-2.18498	0.210124	4.21338e-16
RAB5IF	133.517	2.34219	0.2308	4.43585e-16
DYNC1H1	11940.1	0.996591	0.0541117	4.66961e-16
CTSO	194.073	-1.91473	0.176363	6.14092e-16
FXYD3	309.896	1.68137	0.14599	8.84181e-16
REEP6	1192.49	-1.27894	0.0927536	9.44575e-16
UBFD1	2175.16	1.13822	0.0744916	1.10208e-15
RTCA	729.22	1.3117	0.0982998	1.32255e-15
MFSD3	87.5013	-2.53653	0.263992	1.44103e-15
ERLIN2	883.684	-1.22991	0.0873021	1.56357e-15
FGFR4	1636.96	-1.17038	0.079482	1.83825e-15
NOCT	232.58	1.71115	0.152917	1.98289e-15
SEC24D	1170.16	1.27613	0.0942196	2.49207e-15
DPYSL3	313.453	-1.67203	0.148391	3.06058e-15
RNF19A	976.401	1.29616	0.0970989	3.44379e-15
TMEM129	315.679	-1.62053	0.141456	3.83391e-15
SINHCAF	2117.38	1.11426	0.0723102	4.0306e-15
ETFRF1	115.55	-2.25987	0.229172	4.24426e-15
ORM2	410.303	-1.54047	0.130815	4.46446e-15
PHGDH	1986.61	-1.16343	0.0793425	5.17177e-15
OLFML3	281.532	-1.68289	0.150807	5.43288e-15
SNTB1	1086.02	-1.23	0.0886563	5.96975e-15
S100G	69.1996	2.87218	0.314839	6.26105e-15
LMO7	6617.7	1.01553	0.0592719	6.55256e-15
OLR1	379.974	-1.57525	0.136606	7.20143e-15
PSMD7	2100.71	1.12272	0.0742109	7.53259e-15
OCLN	2726.37	1.15668	0.0791427	7.92401e-15
PRELID2	492.325	1.43991	0.118415	8.32634e-15
SLC37A4	2178.85	-1.14496	0.0776333	9.56997e-15
TUFT1	1190.23	1.20977	0.0866449	9.99467e-15
CENPB	445.292	-1.58159	0.138416	1.04544e-14
TKT	6883.67	1.13168	0.0759897	1.09326e-14
WDR81	392.861	-1.49323	0.126333	1.19116e-14
FOXRED2	1852.26	-1.11652	0.0739552	1.24111e-14
CASP4	1888.93	1.10597	0.0725867	1.29481e-14
RNF19B	532.631	1.38955	0.112218	1.3516e-14
ZNF318	495.177	-1.37988	0.11095	1.41051e-14
RNF128	1479.3	-1.13023	0.0763702	1.66475e-14
TXNL1	1016.02	1.34275	0.10627	1.73965e-14
MYRF	3087.84	-1.05277	0.0656501	1.81721e-14
FNDC3B	1299.32	1.22624	0.0901313	1.90107e-14
DCUN1D3	418.666	1.49682	0.128456	2.08747e-14
WSB1	5500.55	1.08776	0.0708326	2.18145e-14
ARFGAP1	3751.69	1.08724	0.0709141	2.48462e-14
UBAP1	1357.28	1.1453	0.0794805	2.84812e-14
PRR5	536.795	1.34454	0.108171	3.48039e-14
KDM2A	6155.12	0.990925	0.0578775	3.65036e-14
JAG1	2401.04	1.05766	0.0674673	3.99933e-14
IGSF3	1448.98	1.1016	0.0738108	4.18712e-14
LGSN	957.14	-1.2339	0.0927785	4.38138e-14
DENND5A	1375.1	1.16066	0.0823509	4.58038e-14
ARID3B	663.546	1.37787	0.113527	4.78839e-14
TBCK	434.726	-1.42372	0.120154	5.21067e-14
UBTF	881.743	-1.28857	0.100942	5.43903e-14
CALU	6720.67	1.04199	0.0656013	5.67291e-14
PLK2	257.358	1.62685	0.149664	6.155e-14
IGDCC3	256.957	-1.74645	0.167267	6.42923e-14
RANBP10	1347.18	1.14391	0.0805078	6.70497e-14
GYG2	603.265	-1.28033	0.100177	6.98254e-14
RGN	539.421	-1.39947	0.117411	7.26787e-14
APEH	1400.5	-1.19935	0.0885827	7.55559e-14
ATF6B	575.114	-1.30511	0.104079	7.87929e-14
PGGHG	883.337	-1.20909	0.0905708	8.66143e-14
RSRC2	2152.87	1.08949	0.0734271	9.97573e-14
SLC19A3	2530.71	1.10623	0.0759648	1.04576e-13
IGHMBP2	885.795	1.21935	0.0929213	1.15739e-13
PLEKHB2	5581.38	0.988138	0.0590935	1.22074e-13
PSMC1	487.044	1.34846	0.112268	1.36808e-13
SPHK2	682.188	-1.34899	0.112544	1.52595e-13
NIPSNAP1	2181.05	-1.12914	0.0803214	1.61366e-13
SPATA25	85.0804	-2.51501	0.285645	1.71312e-13
CD55	1784.92	1.12996	0.0807693	1.91919e-13
SEMA3A	457.244	-1.39584	0.120319	2.03067e-13
SYBU	402.758	1.39552	0.120489	2.38833e-13
LCN12	169.242	-1.79899	0.180621	2.51347e-13
GPATCH2L	1334.31	1.16596	0.0865345	2.89638e-13
TET1	1328.88	1.20028	0.0916708	3.15863e-13
CCNK	356.631	1.41489	0.123719	3.29369e-13
IL32	760.475	1.25872	0.10057	3.43703e-13
DPAGT1	1026.88	-1.22124	0.0951829	3.59547e-13
MYC	1107.1	1.23452	0.0972816	3.76228e-13
TGIF1	859.539	1.24165	0.098397	3.93243e-13
ETV3	741.657	1.23006	0.0966719	4.10311e-13
MST1R	229.415	-1.69911	0.167123	4.45786e-13
BCAT1	785.478	-1.37806	0.118969	4.63511e-13
IL1R1	431.288	-1.42572	0.126291	4.8236e-13
GPC5	159.766	-1.8898	0.19623	5.02217e-13
TYSND1	409.987	-1.53297	0.143039	5.88596e-13
WDR54	180.728	1.74411	0.175032	6.35705e-13
PSKH1	678.078	-1.28967	0.106444	6.59589e-13
SI	2995.98	-1.30753	0.109231	6.84329e-13
TARBP1	719.068	-1.35549	0.116506	7.09239e-13
CCDC142	244.42	-1.58316	0.15103	7.34864e-13
FSCN1	180.003	1.82597	0.188029	7.62118e-13
TMF1	1273.55	1.2863	0.106289	7.89616e-13
E2F6	501.954	1.32577	0.11236	8.45813e-13
ZNF121	741.98	1.32271	0.112041	9.0533e-13
NMB	94.2725	2.26863	0.255827	9.3591e-13
PSMC6	2303.83	1.09465	0.0776384	1.00234e-12
PLEKHA8	940.641	1.28418	0.106649	1.03847e-12
GPR157	950.871	1.20176	0.0943048	1.15422e-12
APOC3	9293.82	1.07352	0.0747701	1.1959e-12
NTN4	629.233	-1.26963	0.104974	1.28393e-12
ZNF302	731.773	-1.29685	0.109413	1.3814e-12
GSTA2	2433.28	-1.05943	0.0729239	1.43121e-12
AGPAT2	1461.22	1.22523	0.0986779	1.6934e-12
RAB11FIP1	2488.31	1.03419	0.0692837	1.75063e-12
SEC61G	774.549	1.32256	0.113789	1.80844e-12
RGL1	1197.02	-1.19605	0.0943459	1.98385e-12
GSTK1	2437.69	-1.05063	0.0719601	2.10561e-12
POLR3D	930.49	1.19626	0.0944719	2.16719e-12
IDH1	7837.15	-0.982959	0.0616735	2.23644e-12
DDX50	1993.3	1.06387	0.0742952	2.30903e-12
ACP2	453.207	-1.35196	0.119141	2.38568e-12
CDKN1A	673.404	1.26058	0.105095	2.5472e-12
PLXNC1	695.94	-1.23195	0.100737	2.63155e-12
LMO4	827.333	-1.17347	0.0916567	2.71675e-12
CWC22	966.697	1.2026	0.0962097	2.8023e-12
FAM210A	597.961	1.35676	0.1203	2.89009e-12
SOAT2	403.293	-1.4034	0.127772	3.16556e-12
DOLK	237.324	-1.6517	0.166733	3.26365e-12
SEM1	1495.21	1.09056	0.0791124	3.4671e-12
MPP6	463.298	-1.30847	0.113376	3.68129e-12
MTRES1	156.522	-1.74959	0.182671	3.79404e-12
RHOG	522.202	1.32217	0.115667	3.90804e-12
TOMM20	6094.43	1.04415	0.0720539	4.02228e-12
IGSF9	628.448	-1.26547	0.106829	4.1384e-12
ACSL3	5004.62	1.05608	0.073971	4.25513e-12
BTN3A1	719.539	1.32743	0.117043	4.91231e-12
ANXA13	615.914	-1.30839	0.1143	5.06278e-12
PLPP6	122.524	-1.94731	0.215278	5.21378e-12
PNKD	1458.66	1.09435	0.0805289	5.36724e-12
SESN3	1450.78	-1.28036	0.109991	5.52379e-12
C5	446.242	-1.35818	0.122616	5.85527e-12
TBC1D15	1170.97	1.27396	0.109284	6.20435e-12
ZBED3	711.082	-1.21186	0.0996057	6.56872e-12
SFXN1	1644.84	1.04583	0.0732473	6.75746e-12
GBA	534.433	-1.34474	0.120895	6.95519e-12
BMP8B	325.753	-1.43819	0.135901	7.16092e-12
PLCXD2	411.71	1.46589	0.140872	7.64426e-12
IFNGR1	3156.14	1.10056	0.0826834	7.91531e-12
SULT1C2	1514.3	-1.19177	0.0974705	8.48946e-12
SERPINH1	10043.3	1.00728	0.067868	8.78305e-12
PIGH	436.574	1.33109	0.120071	9.09285e-12
FAM114A1	706.03	1.19268	0.0978304	9.4061e-12
CLMP	544.432	-1.27326	0.110822	9.72097e-12
RNF145	616.671	1.21335	0.101184	1.00362e-11
TNKS	1367.01	1.12336	0.0867268	1.03555e-11
LSR	4595.62	1.16625	0.0936595	1.06774e-11
ALDH3B1	915.455	-1.24755	0.106884	1.13354e-11
SPIRE2	403.857	-1.40966	0.133058	1.16731e-11
STAM	1249.24	1.14752	0.0907722	1.20112e-11
PSMD12	1408.36	1.25694	0.108767	1.27688e-11
NAPEPLD	723.713	-1.20228	0.100104	1.43475e-11
HEXD	235.75	-1.59993	0.164838	1.51891e-11
PSMB4	3639.67	0.980467	0.0642488	1.56244e-11
OXER1	153.756	-1.81064	0.199119	1.60595e-11
AGL	688.829	-1.2436	0.107005	1.64945e-11
EGR1	236.464	1.52711	0.153138	1.6937e-11
SPRY4	422.557	1.32303	0.120128	1.87543e-11
WIPF2	2028.53	1.0172	0.0704144	1.97042e-11
ADAT1	249.922	-1.58026	0.162231	2.01916e-11
TMEM132A	278.638	-1.49711	0.148858	2.07023e-11
HTATIP2	1684	1.06116	0.0777541	2.12225e-11
TNFRSF10A	297.559	1.43129	0.13856	2.34127e-11
ASPM	514.961	-1.51518	0.152303	2.39864e-11
SF3A2	920.346	1.22206	0.104448	2.51847e-11
YPEL2	701.124	1.27835	0.113713	2.57932e-11
VARS1	560.849	-1.32642	0.121635	2.64079e-11
XRN1	1241.54	1.15401	0.0935897	2.77477e-11
SEMA4B	445.099	1.38753	0.132032	2.84307e-11
RPS27	21744.4	1.01056	0.0700662	2.98193e-11
IYD	2377.72	-1.02003	0.0716879	3.19592e-11
OAS1	373.233	1.39589	0.133652	3.26835e-11
RPL41	1802.68	1.29832	0.117713	3.49293e-11
AMOTL2	2998.48	1.0366	0.0745341	3.56853e-11
PHLDA2	59.9722	2.50401	0.317139	3.64818e-11
ZCCHC14	940.98	-1.10303	0.0857242	3.73174e-11
MORC3	966.949	1.29364	0.117294	3.81596e-11
MED10	522.61	1.24186	0.108881	3.90492e-11
FLNB	20588.8	0.923605	0.0561609	3.99558e-11
SPATS2	1454.37	1.03831	0.0753407	4.28476e-11
TM4SF4	130.762	-1.86903	0.213941	4.60471e-11
PCYT2	1215.16	-1.12578	0.0902295	4.93728e-11
OGA	3225.42	1.02144	0.0728324	5.04984e-11
MUC17	1969.15	-1.08439	0.0834092	5.16593e-11
PEPD	1618.84	-1.11189	0.0880989	5.63474e-11
TICRR	489.711	1.25128	0.111472	5.75742e-11
IGBP1	2393.16	1.0034	0.0700138	5.88054e-11
ACADSB	1771.96	-1.08104	0.0830727	6.00738e-11
ABCC10	322.146	-1.3795	0.133348	6.14516e-11
RBBP8NL	288.45	-1.45415	0.14606	6.43054e-11
PSMA7	4669.17	1.01231	0.0718268	6.57516e-11
SLC39A10	556.649	-1.29277	0.119018	7.0107e-11
RNF169	1283.88	1.04995	0.0783726	7.1702e-11
RPS25	19988.7	0.99976	0.0699451	7.33218e-11
GAN	279.539	1.52493	0.158666	7.50028e-11
EFL1	622.768	1.17442	0.0995357	7.6703e-11
HSPH1	3699.05	1.2102	0.10565	7.84433e-11
PCCA	408.012	-1.35285	0.129896	8.19888e-11
LRCH1	872.115	1.12657	0.0916323	8.38009e-11
TUBA4A	1056.53	1.16406	0.0980505	8.56619e-11
RHBG	183.42	-1.58699	0.169672	8.75244e-11
KRT8	24717.1	1.06549	0.0814276	8.94355e-11
NR1D1	200.568	1.58022	0.168766	9.13915e-11
TAF1D	5456.41	1.05651	0.0799925	9.33736e-11
SELENON	786.794	-1.19347	0.103253	9.53699e-11
SLCO4A1	532.835	1.35657	0.130948	1.01356e-10
CEP170B	904.585	1.18816	0.102399	1.0337e-10
ABCA1	2157.38	-1.0143	0.0730109	1.05514e-10
IST1	5666.85	0.924433	0.0578068	1.07764e-10
CNN2	1498.63	1.10134	0.0879832	1.1006e-10
MEF2D	760.7	1.12792	0.0925229	1.12361e-10
HLA-B	571.31	1.29607	0.121191	1.14666e-10
DNPH1	345.427	-1.38044	0.136038	1.24683e-10
MAP2K1	734.174	1.16089	0.0984946	1.27278e-10
TMEM250	282.221	-1.41676	0.14234	1.32557e-10
CIR1	1062.3	1.08089	0.084906	1.3524e-10
XYLB	780.588	-1.1592	0.0983255	1.3793e-10
VMP1	4193.62	0.964471	0.0650218	1.40675e-10
DIO1	388.203	-1.331	0.127828	1.4342e-10
KIAA1143	845.244	1.09971	0.0882818	1.46258e-10
BTN2A1	663.105	1.16893	0.100168	1.49104e-10
CCDC186	1292.89	1.32077	0.126271	1.51993e-10
SDC1	624.194	-1.18308	0.10275	1.5499e-10
CWC25	611.635	1.19724	0.1053	1.61168e-10
KITLG	384.804	-1.34904	0.131741	1.67874e-10
EEF1A1	134652	0.921368	0.0581961	1.71697e-10
INTS5	233.362	-1.49706	0.158081	1.7966e-10
EPHA1	777.189	-1.12274	0.0932138	1.83735e-10
TOB1	3568.87	0.954815	0.0641142	1.87816e-10
CTPS1	495.633	-1.22267	0.110647	1.96135e-10
APOA4	552.499	2.17749	0.276542	2.00448e-10
RPS27A	21855.6	0.928015	0.0596638	2.04998e-10
DDC	1171.86	-1.05906	0.0826024	2.09834e-10
COQ5	458.259	-1.22426	0.111532	2.29702e-10
HPS6	140.532	-1.732	0.200319	2.34904e-10
SPON1	3053.88	-0.954136	0.0645487	2.50987e-10
ETS2	814.629	1.09999	0.090166	2.67667e-10
LPCAT3	720.489	-1.11485	0.0930951	2.73991e-10
UROS	524.442	-1.25054	0.117031	2.80487e-10
KCTD9	739.431	1.18869	0.106387	2.94098e-10
JUND	878.773	1.34233	0.133536	3.08198e-10
ABCC4	745.479	-1.13649	0.0973783	3.15612e-10
TRAF6	767.886	1.16966	0.103348	3.30866e-10
MACC1	1829.51	1.10218	0.0914859	3.3871e-10
FEM1C	689.08	1.26383	0.120317	3.47086e-10
ARL8A	271.172	1.52066	0.166041	3.55806e-10
MALT1	742.961	1.1593	0.10216	3.74048e-10
TKFC	441.159	-1.24604	0.117628	3.83547e-10
CDKL5	1433.19	1.10948	0.0933315	3.93035e-10
SAV1	468.505	1.20808	0.110954	4.02736e-10
GSTA4	433.678	-1.2589	0.120161	4.2272e-10
TEX261	875.701	-1.09311	0.0906354	4.32924e-10
ZG16	365.178	1.40891	0.147204	4.43688e-10
SAMD8	675.326	1.23914	0.116958	4.54695e-10
LCP1	962.678	1.10521	0.0930608	4.6587e-10
SLC5A3	1816.53	1.12891	0.097314	4.77074e-10
USP36	1557.08	1.03027	0.0796967	4.88397e-10
GRPEL1	825.165	1.10211	0.0925555	4.99703e-10
KLF5	4294.27	0.963005	0.0676912	5.11165e-10
MYOF	3363	0.936241	0.0631401	5.59923e-10
TFPI	862.566	1.11433	0.0954103	6.01524e-10
FOXQ1	389.493	-1.42912	0.152159	6.15592e-10
SLC25A38	1081.27	1.05676	0.0851271	6.44322e-10
SLC25A20	447.163	-1.20475	0.111849	6.58866e-10
GM2A	2425.64	0.99802	0.074744	6.89535e-10
ALKBH5	1644.18	1.02078	0.0788636	7.05342e-10
HGH1	164.53	-1.58969	0.182113	7.38064e-10
KDM7A	431.783	1.24956	0.120551	7.71649e-10
AZI2	435.701	1.231	0.117314	8.06496e-10
PLAA	303.228	1.32028	0.133611	8.24349e-10
RASSF7	1027.68	1.19027	0.110044	8.42468e-10
SMAD3	2211.92	0.969932	0.0700546	8.61131e-10
HPX	1057.66	-1.11823	0.0972191	8.80901e-10
SMIM4	123.129	-1.78912	0.219791	9.01409e-10
ZBTB25	453.825	1.26098	0.123453	9.22206e-10
PRR15	638.033	1.18436	0.109683	9.6515e-10
TFEC	3345	-1.13294	0.100638	1.03636e-09
CRYBG1	954.274	-1.05362	0.0860727	1.06102e-09
ZNF480	346.006	-1.45233	0.159404	1.08616e-09
HLA-E	2767.01	0.966249	0.0701455	1.13722e-09
EYA3	556.575	1.15058	0.104076	1.18898e-09
PRDX1	5867.18	0.905449	0.0590568	1.21608e-09
PSMB7	2090.86	0.99754	0.076046	1.24334e-09
OSBP2	407.768	-1.26864	0.126035	1.27069e-09
NPEPPS	2596.91	0.986174	0.0739649	1.29801e-09
MMAB	412.435	-1.25371	0.123328	1.32558e-09
AMDHD2	181.808	-1.50662	0.170093	1.38177e-09
OPLAH	195.767	-1.53299	0.175102	1.41055e-09
EFNB1	447.454	1.28417	0.129459	1.4708e-09
SLC25A51	160.481	1.65391	0.198279	1.50352e-09
SOWAHA	159.456	-1.58627	0.185744	1.53624e-09
GVQW3	904.317	-1.1211	0.0996993	1.60523e-09
RCBTB1	288.098	-1.41416	0.154275	1.64092e-09
RPS20	8692.92	0.971319	0.0719264	1.67722e-09
NRIP3	307.549	1.37054	0.146434	1.71492e-09
HIBCH	579.879	-1.16461	0.108063	1.75269e-09
NFKBIA	513.642	1.17068	0.109242	1.79092e-09
NPNT	3846.44	0.933988	0.0652985	1.95356e-09
ULBP2	136.431	1.61925	0.193971	2.08413e-09
MRPL24	326.52	-1.28695	0.13171	2.12936e-09
FUT2	267.437	-1.35086	0.14371	2.17458e-09
COL26A1	260.464	-1.37812	0.149107	2.26932e-09
TSKU	1204.65	1.07732	0.0927292	2.3197e-09
CLCN7	898.896	-1.06419	0.0902664	2.37016e-09
SCD	53093	0.97066	0.0727177	2.47268e-09
ZNRF3	370.802	-1.36304	0.146714	2.52452e-09
TMEM143	178.161	-1.51429	0.175256	2.57644e-09
MYCN	196.369	-1.53526	0.179427	2.63022e-09
PRDX6	8245.79	0.888938	0.0574036	2.68415e-09
PSMA5	1802.49	0.98873	0.0762607	2.73825e-09
CORO1C	3721.47	0.930129	0.0652183	2.84721e-09
CLCF1	114.932	1.79757	0.229255	2.95773e-09
GPX4	4463.83	1.04415	0.0869639	3.07199e-09
UGCG	1474.14	1.09773	0.0971181	3.1301e-09
PSAT1	326.023	-1.34285	0.143672	3.18966e-09
DNASE1	1406.89	-1.01588	0.0816906	3.24917e-09
B4GALT4	2215.76	0.946217	0.0685368	3.30995e-09
SORD	730.784	-1.07788	0.0935297	3.37089e-09
TMEM150A	323.287	-1.30931	0.137528	3.49357e-09
CSNK2A1	4010.14	0.92547	0.0646631	3.55568e-09
MEGF8	518.257	-1.13819	0.105189	3.62003e-09
NARF	986.996	1.02538	0.0837819	3.68523e-09
S100P	267.023	1.31481	0.138856	3.75052e-09
OXSR1	1943.59	0.948507	0.0692488	3.81809e-09
TENT4A	751.805	1.09368	0.0970057	4.09412e-09
NCKIPSD	739.883	1.09665	0.0975949	4.16375e-09
CCNT1	1329.99	1.00855	0.080793	4.23327e-09
ANXA2	11889.6	0.891186	0.0584824	4.30538e-09
PSMD4	2639.21	0.956065	0.0708831	4.37767e-09
FASTKD5	767.618	1.06536	0.0917943	4.45066e-09
HINFP	1261.69	1.04331	0.08761	4.52423e-09
LAMB3	8189.73	0.936688	0.0672555	4.59852e-09
DNAJB2	1104.14	1.06359	0.091529	4.67283e-09
SEC24B	1299.6	1.09603	0.097764	4.82195e-09
MIDN	1150.91	1.1022	0.0989603	4.97152e-09
BFAR	1426.91	1.00462	0.0803105	5.12158e-09
PNP	1427.99	0.980794	0.0758373	5.19919e-09
ALS2CL	761.755	-1.18449	0.114881	5.27702e-09
TDP2	3311.69	0.954935	0.0709153	5.3554e-09
PHTF1	293.551	1.29075	0.135325	5.43435e-09
IGFBP6	215.444	1.46085	0.168028	5.51444e-09
IER5	477.216	1.17126	0.112633	5.76208e-09
CYP2W1	614.443	-1.24222	0.126312	5.84593e-09
CLPB	685.167	1.07572	0.0943772	6.01594e-09
SLC44A3	514.681	-1.16799	0.112327	6.19118e-09
HYAL2	276.994	-1.3339	0.144891	6.39069e-09
MRM1	81.7682	-1.93168	0.260879	6.70024e-09
GPCPD1	355.933	1.23408	0.125763	6.80475e-09
CDK14	332.898	-1.26463	0.131723	6.91006e-09
RPL30	4524.25	1.01019	0.0824297	7.01587e-09
SSTR1	428.991	-1.20139	0.119517	7.12211e-09
ALG8	1209.7	-1.02099	0.0849293	7.47238e-09
CSNK2A2	1818.34	0.956567	0.0723867	7.59314e-09
PURB	853.05	-1.12434	0.105154	7.83832e-09
NMD3	1551.66	1.04613	0.0900031	8.08952e-09
ZNF595	233.213	1.48183	0.175222	8.34605e-09
ZNF514	469.536	-1.17396	0.115075	8.47593e-09
METAP1D	178.086	-1.48317	0.176086	9.30541e-09
UCP2	521.818	-1.14579	0.110047	9.59404e-09
MTERF2	190.689	-1.52837	0.185388	1.00387e-08
ARFRP1	560.268	-1.12802	0.106777	1.01912e-08
AADAC	146.023	-1.57043	0.193968	1.05017e-08
ROR1	325.234	-1.27058	0.134975	1.06589e-08
ERMP1	1240.23	1.10648	0.102673	1.08159e-08
ANKLE2	1579.99	0.958546	0.0736589	1.09794e-08
SEL1L3	518.244	1.13263	0.108544	1.16875e-08
GOLIM4	1291.16	-0.971908	0.07692	1.22804e-08
CAMLG	994.936	1.03921	0.0905695	1.25003e-08
AFF1	2388.71	0.950435	0.0730129	1.29599e-08
CTSD	2813.87	1.07417	0.0978052	1.34278e-08
NOXA1	115.318	-1.80406	0.243866	1.36661e-08
RSBN1L	923.932	1.09496	0.102022	1.39043e-08
YOD1	498.548	1.3251	0.148083	1.41431e-08
CSRNP1	370.454	1.22795	0.128743	1.46266e-08
DNAJC25	584.037	1.17231	0.117824	1.51297e-08
NYNRIN	668.959	-1.09187	0.101772	1.59046e-08
TAF9B	452.261	1.21786	0.127133	1.6167e-08
ZNF263	1171.28	1.02526	0.0885212	1.64352e-08
HPDL	474.196	-1.16869	0.117451	1.69793e-08
SLC29A2	521.206	-1.14867	0.113655	1.72673e-08
WHAMM	449.29	1.19253	0.122528	1.75568e-08
SUSD4	204.363	-1.37554	0.159484	1.7848e-08
MTARC1	710.403	-1.04705	0.0933863	1.90382e-08
GALE	555.752	-1.16468	0.117355	1.93552e-08
DSG2	1934.03	1.00935	0.0859366	1.96743e-08
MDM2	1191.33	1.04831	0.0939779	2.06581e-08
SERTAD2	1220.2	0.983863	0.0809236	2.09907e-08
OSBP	3073.47	0.903688	0.064672	2.13246e-08
IRF2BP1	166.807	-1.53369	0.192703	2.16673e-08
RBM7	847.632	1.04044	0.0925162	2.20094e-08
SMAP1	299.126	1.23742	0.132689	2.27079e-08
JUP	9726.38	0.959804	0.0762492	2.30617e-08
RBCK1	1698.71	1.00629	0.0860832	2.42087e-08
PSME4	2682.66	1.02265	0.0894264	2.46033e-08
MARS1	1287.97	-0.976104	0.0799476	2.50014e-08
PRKAB2	2109.49	1.00969	0.0868651	2.54052e-08
CDKN2AIP	593.058	1.14613	0.115021	2.74879e-08
FGB	5616.28	-1.03048	0.0913814	2.79191e-08
MDM4	856.482	1.04843	0.0950723	2.83506e-08
MKRN1	2049.54	0.942355	0.0733747	2.87909e-08
UBE2V1	203.277	1.42923	0.173472	2.96869e-08
OAS3	310.513	-1.24014	0.134671	3.01386e-08
SPTY2D1	1170.71	0.995309	0.0844615	3.10589e-08
SORBS1	2460.73	0.904489	0.0658051	3.24681e-08
GYS1	1637.32	1.0237	0.0904077	3.34215e-08
CDA	82.8572	1.82641	0.256253	3.39185e-08
ZCCHC7	505.449	1.13594	0.113877	3.44315e-08
UIMC1	648.422	1.05526	0.0972587	3.49515e-08
RPL38	9104.61	0.925311	0.0703954	3.54724e-08
TTPAL	709.321	-1.03602	0.0933022	3.65135e-08
FLOT2	1302.99	-0.95982	0.0776009	3.80911e-08
TET2	901.04	1.11328	0.109423	3.86253e-08
TLCD3A	283.349	1.26878	0.141705	3.91662e-08
RECQL5	466.471	-1.12915	0.112777	3.97067e-08
DCDC2	641.616	-1.07614	0.101886	4.02594e-08
TFE3	739.118	1.0586	0.0982546	4.08125e-08
GAMT	340.676	-1.21308	0.130715	4.2533e-08
CTDP1	265.118	1.2972	0.148397	4.43476e-08
GHDC	371.438	-1.24064	0.136712	4.49699e-08
DDX28	205.847	-1.36282	0.162225	4.55949e-08
PODXL	1433.18	-0.990427	0.0845969	4.68493e-08
SUN1	3776.85	0.888955	0.0635086	4.74991e-08
TRIM21	527.495	1.10082	0.107986	4.81815e-08
DNAJB4	175.048	1.46774	0.185181	5.03074e-08
LGALS2	809.366	-1.03045	0.0934929	5.17467e-08
PNRC1	899.328	1.02581	0.0925529	5.24733e-08
ARFGAP3	1226.97	0.967516	0.0803295	5.32022e-08
RASSF8	338.763	-1.26577	0.142973	5.46591e-08
PNPLA8	776.454	1.11529	0.111501	5.61444e-08
SNAI1	164.979	1.4484	0.181647	5.69021e-08
PSMD1	2637.63	0.947231	0.0763955	5.92338e-08
NBEAL2	569.402	-1.08474	0.105479	6.16548e-08
ZRSR2	192.349	1.38535	0.168968	6.24714e-08
RPS24	28361	0.894392	0.0654155	6.41316e-08
MAPRE2	397.297	1.24671	0.139957	6.583e-08
KCTD11	146.715	1.49667	0.192879	6.75364e-08
PIK3IP1	147.469	1.50005	0.193594	6.83878e-08
DEPDC1B	471.872	-1.14972	0.119942	7.11404e-08
PTTG1IP	7065.24	0.860638	0.0585557	7.20741e-08
MOB2	458.255	1.14683	0.11939	7.30149e-08
TMTC4	596.5	-1.06524	0.102165	7.39795e-08
G6PD	464.842	1.11142	0.112055	7.49571e-08
GALT	449.244	-1.13216	0.11651	7.59413e-08
SLU7	1610.91	0.953409	0.0785853	7.79769e-08
EIF4B	6545.38	0.85811	0.058264	7.90004e-08
FBXO30	597.867	1.2411	0.140303	8.32959e-08
METTL16	1529.55	0.954785	0.0790939	8.43783e-08
PIM2	185.408	1.37543	0.169133	8.5471e-08
CEBPA	852.479	-1.07997	0.106062	8.77138e-08
FCSK	426.427	-1.14498	0.120005	8.99666e-08
NECTIN3	930.631	-1.10931	0.112376	9.22191e-08
FKTN	424.795	-1.1411	0.119204	9.33467e-08
TOMM40L	202.582	-1.35836	0.166	9.45105e-08
ANP32E	443.189	1.17353	0.126606	9.92676e-08
ZNF326	1025.26	0.972071	0.0833864	1.00526e-07
RNF157	333.396	-1.24713	0.142701	1.01796e-07
RPS29	5042.3	0.936667	0.0758624	1.03091e-07
KPNB1	11602	0.853336	0.0579665	1.0573e-07
SLC38A7	337.586	-1.18014	0.128634	1.07081e-07
ALDH5A1	1454.16	-0.942369	0.0772719	1.08442e-07
SEMA3C	1109.91	-0.983682	0.0863274	1.11219e-07
MSANTD3	283.484	1.24091	0.142023	1.1262e-07
RLF	727.85	1.17871	0.128751	1.15517e-07
RPL21	9796.51	0.867293	0.0612962	1.18461e-07
SLC35F6	375.709	-1.14723	0.122074	1.19944e-07
CLDND1	836.641	1.11963	0.116132	1.21441e-07
IQGAP2	1657.04	-0.967766	0.0834244	1.32316e-07
S100A14	6530.56	0.888715	0.0661976	1.33915e-07
UGT2A3	1672.9	-0.960783	0.0819132	1.38707e-07
ST6GAL1	6008.43	-0.845447	0.0568671	1.42008e-07
ECPAS	2909.58	0.909446	0.0709497	1.43719e-07
H1-2	477.927	1.20173	0.134947	1.45454e-07
GATAD2B	868.153	0.984828	0.0875213	1.48939e-07
PABPC1L	965.55	-1.03594	0.0988794	1.54278e-07
PSMA3	2201.59	0.943169	0.0785396	1.56082e-07
NPAT	1261.24	1.09354	0.111628	1.61581e-07
TM2D2	567.405	1.09213	0.11133	1.63424e-07
HOXC12	170.224	-1.48497	0.197843	1.6719e-07
PLEC	4376.05	0.973199	0.0854302	1.72939e-07
TBCD	771.291	-1.04445	0.10153	1.77165e-07
CREG2	550.882	1.07479	0.10837	1.83591e-07
KEAP1	943.453	1.01587	0.09552	1.85858e-07
CYP4F3	384.937	-1.14744	0.124787	1.90424e-07
DMAP1	479.76	-1.08753	0.111604	1.9508e-07
COX11	435.845	-1.18303	0.13292	1.97466e-07
AGTPBP1	220.645	1.3519	0.170678	2.02339e-07
BAG5	968.822	1.00085	0.0926425	2.04839e-07
BTG1	936.159	1.0139	0.0956275	2.07382e-07
BAIAP2L1	1058.62	0.979651	0.0880703	2.12531e-07
SNX17	745.596	-1.04105	0.101796	2.15127e-07
TES	2676.75	0.911392	0.0729137	2.25582e-07
INO80D	791.871	1.11397	0.118173	2.28209e-07
MYL12B	8077.38	0.856974	0.0608552	2.38876e-07
TRIM11	475.574	1.09258	0.114229	2.50594e-07
SULT1E1	262.934	-1.32149	0.165779	2.53658e-07
ACSS1	2545.71	-0.905969	0.0722904	2.56753e-07
C8orf82	123.066	-1.53226	0.213708	2.59965e-07
GFPT1	4940.94	0.913674	0.0741954	2.66437e-07
TCTA	364.322	-1.26007	0.15252	2.72975e-07
ARHGEF28	626.272	1.0333	0.10133	2.79594e-07
PBX2	1206.04	-0.946569	0.0817799	2.82949e-07
DNAJC7	2197.18	0.914234	0.0745346	2.86366e-07
RPS13	14331	0.85593	0.0613599	2.89805e-07
FASTK	784.051	-1.02265	0.0991519	2.96702e-07
EREG	269.257	1.24573	0.149803	3.00215e-07
TTC31	654.766	-1.00835	0.095997	3.0373e-07
SERPINB9	351.159	1.13693	0.1254	3.07394e-07
SAP30	79.8036	1.77737	0.271225	3.14877e-07
FBXO42	498.751	1.05715	0.107455	3.18658e-07
RFLNA	1360.3	-0.983826	0.0909829	3.42097e-07
GALK1	409.853	-1.12692	0.123797	3.46155e-07
RRAGD	412.1	1.14273	0.127487	3.54326e-07
TTR	6783.37	-0.942783	0.0818859	3.58527e-07
PDZD3	649.209	-1.06206	0.109229	3.62761e-07
SLC12A9	483.91	-1.05944	0.10866	3.67014e-07
LASP1	8299.73	0.863213	0.0638215	3.71404e-07
ZBTB7A	486.626	1.13007	0.12525	3.84843e-07
IVD	1101.2	-0.96446	0.0872855	3.94075e-07
OVOL1	731.536	1.04321	0.105435	4.07961e-07
PPP1R13L	566.767	1.09171	0.116595	4.1259e-07
TNS1	1076.26	0.976115	0.0900209	4.17237e-07
LMAN1	2595.58	0.900183	0.0725988	4.26611e-07
SLC26A2	15588.9	0.931496	0.0799043	4.31428e-07
NFRKB	2653.05	0.8809	0.0682402	4.3624e-07
XPNPEP2	144.804	-1.42382	0.193613	4.4596e-07
FAM83B	658.873	1.09376	0.117435	4.50849e-07
MTF1	403.134	1.09194	0.117147	4.60812e-07
ELOC	497.538	1.08267	0.115107	4.65889e-07
PSD4	514.094	-1.1545	0.131823	4.76135e-07
FAHD1	455.709	-1.07561	0.113613	4.86454e-07
LHPP	338.065	-1.17302	0.136233	4.91676e-07
SLC25A11	290.645	-1.254	0.155158	4.97008e-07
THAP3	228.643	1.3077	0.167767	5.02437e-07
TMEM64	425.625	-1.22597	0.148988	5.08005e-07
H6PD	963.884	-0.953629	0.0857229	5.19179e-07
PSMD6	1170.11	0.950677	0.0850557	5.24796e-07
RAB3D	506.459	-1.10715	0.121465	5.30421e-07
ACAT1	1543.44	-0.944369	0.0836384	5.36092e-07
CLN8	588.979	1.03331	0.104479	5.47695e-07
FKBP14	409.04	1.10304	0.120788	5.53562e-07
RAB27A	309.266	-1.18285	0.139404	5.59429e-07
ZBTB43	644.573	1.06719	0.112472	5.71181e-07
FBXO7	2413.2	0.890593	0.0713623	5.83104e-07
PSMB3	2430.42	0.926784	0.0800773	5.95772e-07
FUOM	406.465	-1.10736	0.122459	6.02258e-07
TMEM42	158.419	-1.34862	0.17909	6.15308e-07
CHMP5	1067.66	0.967617	0.0897935	6.28458e-07
KIF22	1370.38	0.961521	0.0884863	6.41892e-07
LIPH	1391.03	0.953953	0.0867233	6.48664e-07
SLC27A3	337.889	-1.18879	0.141934	6.55444e-07
UPB1	303.557	-1.14393	0.131523	6.62355e-07
LIPT2	97.621	-1.6076	0.2407	6.69302e-07
DZIP3	581.021	-1.12037	0.126513	6.98812e-07
HDHD5	943.549	1.00564	0.0996982	7.21887e-07
SNX19	1771.36	-0.883883	0.0708658	7.29824e-07
SLC17A4	445.765	-1.21702	0.149845	7.37751e-07
IL18BP	773.135	0.973667	0.092159	7.45679e-07
DDX55	837.242	0.97496	0.0925177	7.61657e-07
PIGM	316.751	-1.16425	0.137496	7.69728e-07
FOXJ3	1488.83	0.905905	0.0761866	7.77809e-07
GOPC	597.44	-1.12161	0.127434	8.02101e-07
CEMIP2	671.922	1.01597	0.102461	8.18467e-07
HARS1	1086.41	0.956928	0.0885087	8.26869e-07
YY1AP1	964.363	0.949204	0.0866772	8.35271e-07
ACSL1	755.522	-0.971168	0.0919454	8.43737e-07
IER3	68.1529	1.84503	0.300051	8.52227e-07
TTC9C	578.859	1.00557	0.100174	8.60734e-07
KMT2C	3589.42	0.916381	0.0790088	8.69395e-07
HES4	145.603	1.57447	0.235932	8.78072e-07
TNFAIP3	921.329	0.97826	0.0938681	8.95637e-07
AIFM1	832.507	-0.994958	0.0979896	9.13517e-07
PPP1R11	1111.2	0.944424	0.0859383	9.22604e-07
NSD1	1383.86	-0.909918	0.0777277	9.31768e-07
HSD17B8	185.945	-1.33184	0.17871	9.50139e-07
CRTC1	283.352	-1.17011	0.140227	9.68923e-07
EIF1AD	798.945	0.969404	0.0922225	9.78555e-07
TCP11L2	496.542	1.04928	0.111398	9.88199e-07
COPS2	1604.81	1.04166	0.109585	9.97858e-07
PCED1A	498.986	-1.06939	0.116427	1.02757e-06
MICA	667.958	1.00072	0.0999958	1.05756e-06
ATP6V1G1	1895.88	0.92239	0.0812831	1.10837e-06
BCL3	283.938	1.22313	0.153785	1.13921e-06
SLC38A1	3097.99	-0.928435	0.0827861	1.14953e-06
PHRF1	1464.66	0.995651	0.0992427	1.17077e-06
SYAP1	1742.26	0.900114	0.0762906	1.18196e-06
PAK2	2386.69	0.899866	0.0762858	1.19329e-06
SLC46A1	730.524	-0.990493	0.0982877	1.25007e-06
SLC26A6	3230.29	0.907191	0.0781804	1.27306e-06
CDX2	3313.09	0.93132	0.0840828	1.31947e-06
TMEM164	1468.85	-0.898853	0.0762675	1.34304e-06
B4GALNT4	367.717	1.1646	0.140903	1.35492e-06
POLR1A	1062.72	-0.966249	0.0927452	1.37892e-06
PPP1R15B	1784.37	0.927476	0.0833418	1.39098e-06
SHANK2	1737.59	-0.883013	0.0725557	1.40312e-06
FRK	739.18	1.02666	0.107567	1.41535e-06
BCAP31	2784.25	0.90589	0.0782082	1.42772e-06
GCNT2	1210.57	0.91138	0.0796591	1.4404e-06
THBS1	1116.62	0.9567	0.0907812	1.45324e-06
EIF3A	7127.75	0.817318	0.0567489	1.46609e-06
SERPINB1	2512.45	0.859934	0.067245	1.47924e-06
MAPK6	2318.8	0.93913	0.0866558	1.50565e-06
GJB1	1566	-0.892587	0.0753417	1.51912e-06
OSBPL7	371.632	-1.08679	0.122913	1.54604e-06
ATG4A	232.508	1.21679	0.15482	1.59998e-06
DSP	13261.3	0.797747	0.0522548	1.62762e-06
NGLY1	736.122	1.04534	0.113121	1.64177e-06
MICAL3	1132.33	0.953923	0.0907284	1.65612e-06
HAVCR1	5295.34	0.848	0.0647513	1.67073e-06
CYP2R1	323.16	-1.17709	0.145877	1.68555e-06
TBCA	1728.94	0.890857	0.0753614	1.70034e-06
RUVBL1	424.264	-1.07026	0.119754	1.74563e-06
PSMB5	3152.17	0.86877	0.0700564	1.7609e-06
KRCC1	150.758	-1.33443	0.185221	1.80715e-06
TRNP1	269.857	-1.24077	0.162122	1.83828e-06
SDE2	550.964	1.04183	0.113056	1.85415e-06
DHX15	3113.59	0.921664	0.0833409	1.87007e-06
RBMS2	852.873	0.969171	0.0952707	1.8865e-06
RPL37	25256.6	0.86098	0.0688228	1.93946e-06
ACTB	29920.5	0.833715	0.0620519	1.9577e-06
AMIGO2	160.802	-1.40985	0.205992	1.97627e-06
SLC35C2	1241.73	-0.941564	0.0890812	1.99493e-06
USP40	535.133	-1.04104	0.114017	2.03246e-06
PSAP	57449.1	0.82099	0.0590848	2.05177e-06
KAT2A	757.563	-0.961203	0.0943209	2.11059e-06
ZNF253	141.929	-1.3543	0.193051	2.15061e-06
KCNK5	698.948	-1.00775	0.10614	2.17078e-06
MAPK7	297.277	1.12605	0.135865	2.191e-06
SLC5A9	1109.77	-0.954052	0.0927144	2.21133e-06
ABCB6	283.873	1.18823	0.151553	2.23167e-06
WNT11	191.641	1.30077	0.18	2.29328e-06
MUC13	2797.04	0.898303	0.0788245	2.31402e-06
TUBGCP6	577.932	-1.02289	0.11024	2.33498e-06
F11R	4143.42	0.848675	0.0665391	2.399e-06
PLEKHA1	1794.01	0.947907	0.0916975	2.44298e-06
RHEB	994.978	0.973617	0.0983839	2.46595e-06
SEC13	2006.82	0.861793	0.0701379	2.48925e-06
AARS2	283.217	-1.16613	0.14729	2.51264e-06
ABTB2	184.467	1.24478	0.167265	2.53611e-06
KBTBD11	359.486	-1.10395	0.131622	2.58318e-06
TNFAIP8L1	320.129	-1.12996	0.13853	2.77559e-06
LEAP2	84.1066	1.59392	0.257261	2.85064e-06
VIL1	9190.75	-0.820188	0.0599859	2.87623e-06
PDLIM2	601.306	1.0047	0.107052	2.90185e-06
PEA15	781.841	0.946873	0.0924102	2.97942e-06
TFF2	144.038	-1.35982	0.19803	3.00583e-06
NT5E	236.096	-1.23109	0.165375	3.08572e-06
VDR	342.423	-1.10161	0.132332	3.11303e-06
IFI35	229.442	-1.22759	0.165157	3.25285e-06
PTMA	6563.98	0.870966	0.0735287	3.28175e-06
FMO5	438.941	-1.0586	0.121861	3.33988e-06
POLR1D	2299.6	0.8543	0.0693613	3.36952e-06
PITHD1	587.547	0.993389	0.105448	3.43039e-06
DEPDC7	1051.91	0.974657	0.100683	3.4616e-06
PDGFA	1137.39	0.907361	0.0834071	3.52489e-06
IPMK	1124.2	0.992672	0.105689	3.62188e-06
ZC3H12A	170.095	1.27937	0.18022	3.68815e-06
YBX3	1498.29	0.872285	0.0746162	3.7552e-06
NEURL3	114.61	1.3949	0.210533	3.85676e-06
SOGA1	657.434	-0.958594	0.0971217	3.89079e-06
RTN3	4689.1	0.88244	0.077442	3.96012e-06
PRDM1	409.099	-1.06476	0.125219	4.06692e-06
RASSF3	404.04	1.03997	0.118783	4.10321e-06
WBP2	1525.79	0.898327	0.081885	4.28547e-06
ARV1	151.512	-1.29959	0.186821	4.32236e-06
CNOT11	2305.94	0.856829	0.0711258	4.43388e-06
TBK1	725.74	0.97667	0.102493	4.47114e-06
BNIP1	239.352	1.15103	0.148261	4.50896e-06
FANCF	198.667	-1.23017	0.169112	4.62321e-06
P4HB	11173.7	0.858153	0.0716998	4.73903e-06
RPS3A	8398.05	0.845407	0.0683614	4.7779e-06
TPM3	6870.83	0.828755	0.0639957	4.81677e-06
PGAP6	1094.32	-0.942332	0.0938353	4.85578e-06
RPL24	10085.7	0.818809	0.0614447	4.97377e-06
PSMC2	2363.85	0.874965	0.0763785	5.13388e-06
ESPL1	681.749	-0.962728	0.0994941	5.17451e-06
ZNF394	560.709	0.992683	0.1074	5.21519e-06
SLC25A29	308.545	1.10929	0.138198	5.29691e-06
CABLES2	598.036	-0.972492	0.10227	5.42129e-06
SMARCB1	824.521	-0.947054	0.095577	5.46308e-06
PPP1R12B	831.333	0.957426	0.0983909	5.50535e-06
CTTNBP2NL	436.096	1.01157	0.112906	5.59149e-06
ODC1	3992.69	0.842209	0.0681436	5.63556e-06
IQGAP1	4630.61	0.842004	0.0681213	5.72422e-06
ARID5B	2732.24	-0.83112	0.0653339	5.90392e-06
YPEL5	1343.49	0.899528	0.0834995	5.94912e-06
LRRC45	166.72	-1.29629	0.188899	5.99459e-06
ZC3H4	488.012	-1.05682	0.125411	6.08616e-06
ZBTB5	922.739	0.907597	0.08582	6.13269e-06
SND1	8678.39	0.833045	0.0661059	6.27519e-06
SLC45A3	473.459	-1.00499	0.111945	6.37068e-06
MREG	449.063	1.06225	0.12724	6.46633e-06
HLA-C	3323.11	0.865544	0.0749037	6.56319e-06
PAQR8	482.545	-0.999046	0.110781	6.8118e-06
IRF6	2656.1	0.832492	0.0663014	6.86294e-06
APBB2	1095.54	-0.893094	0.0825679	6.91435e-06
PCSK1N	117.893	1.44251	0.230364	7.02112e-06
RPL34	7410.68	0.81696	0.0624591	7.07632e-06
GNPAT	1596.98	-0.892432	0.0828429	7.18734e-06
SYF2	853.261	0.942422	0.0963131	7.24304e-06
ACBD4	309.41	-1.08248	0.134368	7.46995e-06
TBC1D20	1732.43	0.845763	0.0705086	7.58595e-06
RAPGEF5	1039.99	0.908947	0.0876273	7.70284e-06
ANO9	1313.15	-0.909861	0.0878891	7.76152e-06
PEX11A	255.545	1.11799	0.144341	7.88031e-06
ZBTB21	523.237	1.01865	0.117532	7.94048e-06
P3H4	367.533	-1.06373	0.129842	8.06176e-06
GUCY2C	1636.44	-0.953962	0.100105	8.18328e-06
OXLD1	168.476	-1.21692	0.171795	8.36829e-06
SLC35E1	1063.94	0.896882	0.0848462	8.49427e-06
ITGA6	1113.39	0.899071	0.085544	8.55847e-06
MED6	502.409	1.01293	0.116651	8.75227e-06
PXMP2	65.7632	-1.59916	0.277191	9.08133e-06
RAC1	3162.29	0.851959	0.0730673	9.14979e-06
RPL23A	2410.98	0.848822	0.0722226	9.2867e-06
RABGGTB	1209.86	0.907828	0.088416	9.56151e-06
C1S	924.111	0.89907	0.0860193	9.63015e-06
EPHB4	1408.84	-0.878702	0.0806237	9.77132e-06
FTH1	1343.29	1.61171	0.281826	9.84219e-06
PDE8A	1172.66	0.899014	0.0863657	9.98724e-06
DEPTOR	167.572	-1.24007	0.180432	1.02081e-05
GOLGB1	4943.97	1.33745	0.20735	1.02828e-05
DSC2	599.378	0.944565	0.0991883	1.03585e-05
CEP152	343.312	1.04528	0.126979	1.04342e-05
PSMC3	1878.75	0.903406	0.0878474	1.05099e-05
EIF3L	6784.87	0.814153	0.0632274	1.05856e-05
HENMT1	223.213	-1.14675	0.155126	1.07379e-05
ADARB1	447.655	-0.988067	0.111454	1.08159e-05
TRMU	769.483	0.927232	0.0948821	1.11363e-05
RNF114	3737.54	0.815303	0.0639279	1.12183e-05
CENPJ	585.643	0.963225	0.105204	1.1719e-05
CGREF1	155.659	-1.24618	0.183957	1.18034e-05
NUP58	1326.69	0.937265	0.0981006	1.20592e-05
SRPX	138.573	1.26443	0.189295	1.21449e-05
ABI1	1947.28	0.861292	0.077029	1.23173e-05
MCRIP1	189.441	-1.19976	0.171504	1.24045e-05
TFRC	12357.3	0.80953	0.0627948	1.26723e-05
FXR1	2459.55	0.869771	0.0797803	1.27645e-05
TAF13	151.713	1.2507	0.186733	1.29507e-05
ZNF384	1067.63	0.88305	0.0837534	1.32355e-05
ST3GAL2	379.386	-1.13334	0.154254	1.35273e-05
GPR39	141.218	-1.29122	0.19868	1.36245e-05
PAIP2	666.334	0.941543	0.100396	1.39176e-05
TMCO6	223.636	-1.16279	0.162765	1.41146e-05
P2RY1	299.426	-1.05484	0.132382	1.42133e-05
GOLGA2	1861.64	0.844847	0.0732574	1.43126e-05
MPHOSPH10	1410.7	0.907044	0.0909862	1.45154e-05
RPL32	16313.5	0.837896	0.0714763	1.47203e-05
USP37	549.447	1.00298	0.118154	1.48231e-05
TMEM184A	293.697	-1.07598	0.138845	1.49264e-05
TMEM80	809.615	-0.908118	0.0914605	1.5342e-05
OGDH	1071.35	-0.901486	0.089815	1.56629e-05
PYCR1	583.787	-1.01387	0.121775	1.58795e-05
SLC9B2	366.468	-1.00742	0.119962	1.59881e-05
DNAAF2	180.157	-1.19308	0.17284	1.6533e-05
RBPJ	1424.18	0.945112	0.102428	1.66433e-05
TUBA1C	1896.56	0.922532	0.0960665	1.67544e-05
IPO9	1607.32	-0.858963	0.0780018	1.68659e-05
GASK1B	404.188	-1.05833	0.134795	1.69778e-05
NR3C1	817.421	-0.913752	0.0937238	1.70912e-05
RPL35A	10808.5	0.824638	0.0683665	1.72056e-05
ZDHHC24	367.036	-1.0479	0.132113	1.73206e-05
ZNF329	298.37	1.07059	0.138618	1.74358e-05
IRGQ	518.698	0.957932	0.106512	1.75518e-05
TOR1AIP2	1257.39	0.859742	0.0785558	1.77863e-05
RFX5	310.353	-1.06118	0.136246	1.80227e-05
SLC25A26	450.979	0.995435	0.117446	1.81411e-05
CHPF2	1049.55	0.913297	0.0939549	1.82597e-05
SH3GLB1	788.536	0.925911	0.0976472	1.83795e-05
MLXIPL	351.497	-1.09844	0.147272	1.88628e-05
ASL	733.588	-0.943374	0.102824	1.92282e-05
CCDC71	144.837	-1.26114	0.194279	1.97221e-05
MIF4GD	128.078	-1.33179	0.214637	1.98464e-05
AIP	1698.61	0.921575	0.0969416	2.00984e-05
PIGA	354.433	1.05747	0.136135	2.02266e-05
SNRNP48	685.855	0.951177	0.105739	2.08782e-05
PKP4	2443.74	-0.829072	0.070567	2.10118e-05
IRF2BPL	195.765	-1.27004	0.198351	2.12825e-05
POMGNT1	531.605	-0.965917	0.110299	2.14185e-05
AP2B1	5555.33	0.821898	0.0686186	2.15549e-05
MOCS3	234.685	-1.087	0.145546	2.18301e-05
CTSC	1620.99	-0.837566	0.0732597	2.19687e-05
LCMT1	817.438	0.911426	0.0947019	2.21076e-05
TIMD4	61.6096	1.59333	0.293032	2.26715e-05
SIRT5	316.212	-1.09689	0.148834	2.2814e-05
TMEM86B	102.495	-1.33394	0.218984	2.35611e-05
HMGB3	277.463	-1.06885	0.141532	2.37149e-05
RPL31	22031.3	0.816448	0.0677613	2.4025e-05
RNASEL	471.116	0.993705	0.119681	2.41806e-05
PGAP3	351.011	-1.03558	0.131947	2.4336e-05
IRF2BP2	1987.82	0.853244	0.0785688	2.46469e-05
CCNT2	1448.48	0.885579	0.0880862	2.48034e-05
ADGRG6	4785.78	-0.879911	0.0864355	2.49599e-05
LPCAT1	489.919	0.960769	0.110298	2.52762e-05
PAM	2012.25	0.823951	0.070299	2.56003e-05
LTBP1	539.243	-0.962624	0.111138	2.59286e-05
ASCC1	907.795	0.880621	0.0870441	2.6094e-05
HES1	1324.14	0.911315	0.0961363	2.65917e-05
SLC6A20	286.537	-1.06355	0.14101	2.67581e-05
COLCA2	83.6504	-1.43856	0.252698	2.79711e-05
CKS1B	442.149	0.986851	0.119343	2.8691e-05
TULP3	744.736	0.90544	0.0952492	2.90578e-05
SLC23A1	1704.54	-0.836035	0.0746817	2.94295e-05
TMEM189	735.916	0.89919	0.0934862	2.96156e-05
ESYT2	3319.89	0.819757	0.0698707	2.98022e-05
KCNE3	1045.1	-0.865974	0.0836376	2.9989e-05
RPL9	10796.9	0.817743	0.0694495	3.03689e-05
SELENBP1	566.465	-0.94925	0.108834	3.09528e-05
CCDC47	2853.58	0.800161	0.0643229	3.1149e-05
IL1R2	266.309	1.06108	0.142313	3.13451e-05
RGS10	168.673	1.22103	0.190137	3.15412e-05
CRABP2	72.3885	1.56422	0.292992	3.21327e-05
STIL	639.972	0.951495	0.109667	3.23303e-05
LSS	1954.78	-0.845112	0.0778758	3.25291e-05
SH3RF1	837.041	0.908311	0.0968541	3.29277e-05
LRRFIP2	1259.05	0.84515	0.0779764	3.31287e-05
POLR2C	2599.13	0.818419	0.0700194	3.33316e-05
CCNC	1496.21	0.89333	0.0925533	3.39426e-05
AMOT	996.27	-0.867662	0.0848724	3.41473e-05
ACTL8	417.494	-1.02052	0.130971	3.47688e-05
VCL	2165.43	0.807388	0.0669013	3.51855e-05
CCDC90B	842.704	-0.939792	0.106851	3.56055e-05
DMAC1	356.592	-1.00464	0.126466	3.58185e-05
DNAJC15	668.334	-0.938311	0.106554	3.60333e-05
PRRG2	111.409	-1.28307	0.210612	3.62491e-05
COL5A2	5798.28	-0.776123	0.0576975	3.64659e-05
ASTE1	540.944	-0.956102	0.112208	3.69071e-05
FILIP1L	1062.38	-0.874448	0.0875309	3.71283e-05
SMARCC2	1133.49	-0.875999	0.0880426	3.73507e-05
EEF1B2	15606	0.801733	0.0655786	3.75729e-05
BOP1	260.523	-1.06756	0.146131	3.80213e-05
PXMP4	680.142	-0.917223	0.100838	3.87094e-05
UROD	287.797	-1.10123	0.156683	3.89395e-05
TRNAU1AP	222.909	1.10329	0.157325	3.91696e-05
ATP1A1	21463.9	0.76228	0.0538511	3.94012e-05
GNAI3	964.009	0.892921	0.0936342	4.0103e-05
ARHGEF7	1964.19	0.819132	0.0714602	4.15435e-05
RNF111	856.004	0.867756	0.086405	4.20374e-05
CCNG2	1555.07	0.85197	0.0816456	4.27836e-05
RPS11	29647.6	0.81004	0.0688417	4.30331e-05
GCFC2	228.676	-1.12787	0.166503	4.40451e-05
ABCC5	589.589	0.926368	0.104773	4.50745e-05
WDR72	436.527	-1.00878	0.130109	4.55914e-05
UQCC2	366.212	-1.02543	0.135246	4.6109e-05
GGA2	3172.39	0.787383	0.0622026	4.63701e-05
RPL7	13654.7	0.801506	0.0665791	4.68943e-05
ZNF239	115.96	-1.26917	0.210536	4.7159e-05
CPSF6	1059.37	-0.894967	0.0953932	4.74235e-05
ZNF12	1390.02	0.896112	0.09577	4.76886e-05
MCCC2	2000.65	-0.807679	0.0686661	4.82259e-05
GPA33	375.453	1.00367	0.129117	4.84965e-05
IRAK4	227.559	-1.06459	0.147997	4.87689e-05
PIP5K1A	1388.07	0.836971	0.0778833	4.98655e-05
TUBB2B	153.137	1.21146	0.193796	5.04232e-05
PHETA1	259.94	-1.11175	0.162973	5.07026e-05
RNF149	1720.44	0.821683	0.0732736	5.12632e-05
DUSP14	359.965	0.978715	0.121992	5.21093e-05
ZNF841	769.095	0.942971	0.11127	5.29772e-05
TRMT1L	348.976	-1.04211	0.142198	5.32731e-05
BIN3	236.374	1.08461	0.155644	5.41709e-05
EDN1	140.136	1.18724	0.187805	5.5379e-05
SUGCT	165.805	-1.14458	0.174777	5.62993e-05
WWTR1	1110.48	-0.8734	0.090279	5.75538e-05
ADPGK	1277.46	0.8348	0.0782698	5.81892e-05
RPS23	5080.56	0.82563	0.0754963	5.88323e-05
ELOA	617.194	0.911244	0.102368	5.91546e-05
XPNPEP1	2285.57	0.827619	0.0761537	5.98002e-05
ZNHIT3	786.48	0.88173	0.0932335	6.0449e-05
PLP2	589.692	0.92456	0.10684	6.17632e-05
SLC35A3	739.422	0.962654	0.118858	6.20945e-05
STRAP	2753.75	0.84	0.0803576	6.30972e-05
NACA	9407.15	0.783181	0.0625154	6.3436e-05
R3HCC1L	602.887	0.947855	0.11446	6.37748e-05
RPS12	20215.7	0.795908	0.0665579	6.41147e-05
DENND2D	317.502	-1.00982	0.134172	6.44579e-05
ZNF189	622.692	-0.945918	0.114072	6.48036e-05
YTHDF1	2650.25	0.801302	0.0685308	6.55123e-05
TMEM106C	2366.84	-0.8208	0.0747675	6.62261e-05
ETFB	542.104	-0.945634	0.114344	6.65833e-05
THG1L	593.26	0.901534	0.100374	6.69406e-05
LARGE2	168.813	-1.1478	0.178604	6.76578e-05
DNAJB6	1129.33	0.844438	0.0824487	6.91125e-05
SH3D21	394.251	1.00093	0.132191	6.94771e-05
RPL10	21342.1	0.832064	0.0785708	7.02094e-05
GEM	145.817	1.17042	0.186208	7.05765e-05
ATP8A1	1629.15	-0.869386	0.0904805	7.13108e-05
DCTN4	2081.57	0.825748	0.0766089	7.16783e-05
NFKB1	593.589	-0.904344	0.101816	7.27915e-05
FBXO34	1130.88	0.848594	0.0841107	7.39211e-05
GSS	1265.79	-0.827581	0.0774446	7.43003e-05
ZNF136	222.281	1.07879	0.157679	7.46805e-05
SYTL5	204.331	-1.08453	0.159608	7.5063e-05
OSGEPL1	125.305	-1.27486	0.220653	7.62199e-05
MYO15B	1588.34	-0.909783	0.104112	7.85631e-05
ABCB7	1080.23	0.855967	0.0868805	7.89574e-05
LRRC59	4746.24	0.784091	0.063878	7.97481e-05
CHDH	1980.03	-0.837012	0.0808783	8.01454e-05
MPV17	469.806	-0.981759	0.127422	8.21377e-05
TNFRSF1A	1417.45	0.849829	0.0850563	8.25363e-05
SERPINA11	63.1139	-1.48128	0.288868	8.41796e-05
NRBP1	2852.61	0.789209	0.0658344	8.50074e-05
HMGCS1	17019.8	0.824233	0.077226	8.58443e-05
DHRS2	319.469	1.05363	0.152105	8.71634e-05
VKORC1	275.673	1.03137	0.145125	8.80693e-05
GSDMB	636.805	0.933235	0.113228	8.85222e-05
SLC16A10	425.972	-0.961303	0.12238	8.89758e-05
ASAP2	838.445	0.894795	0.100938	9.03531e-05
ZFAND3	1518.1	0.813386	0.0744918	9.08196e-05
TAF7	3331.77	0.772883	0.0613701	9.12932e-05
PNPO	1037.19	-0.848452	0.0860854	9.17685e-05
RPL23	34455.1	0.775927	0.0623945	9.22437e-05
ALDH18A1	7138.93	0.758759	0.0568094	9.27208e-05
UBXN4	5109.51	0.81595	0.0756045	9.36834e-05
PAICS	3552.67	0.81083	0.0739347	9.41667e-05
RINT1	458.233	0.985822	0.131319	9.51392e-05
RIDA	295.063	-1.03668	0.148008	9.56263e-05
TMEM63A	1819.33	-0.808747	0.0733677	9.61162e-05
ELL	270.248	1.09641	0.167808	9.66098e-05
SGSM2	750.463	-0.901919	0.104285	9.96164e-05
NFE2L2	1749.12	0.827135	0.0796873	0.000100123
CPSF2	917.607	-0.864071	0.0920419	0.000101659
ZNF516	370.602	0.952049	0.121368	0.000104806
CERS4	374.277	-0.999887	0.137255	0.000105337
PFDN5	3312.72	0.780311	0.0646405	0.00010587
C16orf58	472.961	-0.974806	0.129122	0.000106942
UGT2B7	105.312	-1.31856	0.243074	0.000108019
RHOBTB1	223.522	-1.04435	0.152277	0.000109636
ZUP1	308.467	1.02547	0.146153	0.000111262
RLIM	945.258	0.879788	0.0978202	0.000111805
STAG1	504.452	-0.92918	0.114237	0.000112349
CHMP6	108.721	-1.23918	0.217546	0.000114009
NAB2	566.969	0.910275	0.108325	0.000116796
UBA52	5503.1	0.813593	0.0761403	0.000117356
BABAM2	594.334	-0.904578	0.106543	0.000117922
HSPE1	681.326	-0.894418	0.103181	0.000118489
CCDC120	514.823	0.949238	0.121584	0.000120198
DNAJC30	96.9681	-1.25463	0.223522	0.000120769
RBM22	1530.11	0.80804	0.0745727	0.000121928
KCTD5	598.737	0.903974	0.106708	0.00012309
WEE1	1484.3	0.839278	0.0850788	0.000123673
PTPRA	2619.03	0.79852	0.0716382	0.000126618
LUZP1	814.969	0.852715	0.0898734	0.000127816
RAB29	567.31	-0.899875	0.105783	0.00012842
NOB1	1150.23	0.863063	0.0934728	0.000129028
LDLRAP1	261.862	-1.009	0.142751	0.000130252
ITGB5	1161.4	-0.839443	0.0857983	0.000132739
AGPAT5	828.027	0.869875	0.0960649	0.000133363
CABIN1	1428.22	0.825578	0.0811685	0.00013399
MUC3A	1036.26	0.859788	0.0927892	0.000135248
DUSP9	370.502	-0.954603	0.124842	0.000135881
HPGD	649.585	-0.913475	0.111113	0.000138441
NDUFC2	839.483	-0.89818	0.106046	0.000140374
BBS2	529.971	-0.892766	0.104214	0.000141019
GPD1L	189.795	-1.07463	0.165828	0.000142309
CENPX	385.955	0.976011	0.132477	0.000142956
NAALAD2	1382.32	-0.908488	0.109604	0.000143603
PYGB	998.83	-0.854141	0.0913133	0.000146861
CDK7	1505.45	0.814572	0.0781749	0.000149536
SMG1	4870.39	0.811703	0.0772055	0.000150212
SRD5A3	178.47	-1.07792	0.168063	0.000151577
HINT1	5200.78	0.752367	0.0571236	0.000152952
C1orf52	273.411	1.02706	0.150949	0.000154332
CAMKV	265.083	-0.99625	0.140448	0.000155024
CFAP36	482.641	0.931737	0.118474	0.000156411
RPS18	30314.8	0.785353	0.0685255	0.000157806
MIDEAS	882.064	0.846916	0.0895843	0.000158505
PSMD8	2557.67	0.795041	0.0718589	0.000159904
PODXL2	662.511	-0.88979	0.104431	0.000162022
DHRS1	302.814	-0.982935	0.136444	0.000162736
CHP1	3501.24	0.779768	0.0670486	0.000166365
SNX25	446.453	0.919965	0.115339	0.000167106
ANP32B	3901.74	0.762266	0.0610971	0.000170081
RTL8C	600.016	0.87624	0.100536	0.000174576
UNC119	1013.7	0.830442	0.0847286	0.00017533
SLC10A7	282.665	0.974003	0.134287	0.000176083
GLUL	9115.08	-0.746669	0.0558231	0.000176836
RNF126	488.308	0.989035	0.139526	0.00017759
ARHGAP17	1608.86	0.801922	0.0751024	0.00018141
ABCA3	333.65	-0.957845	0.129086	0.00018218
GPR137B	110.361	1.26027	0.233852	0.000183721
ZNF222	130.877	1.18321	0.207418	0.000186052
TMC4	694.394	-0.883253	0.103647	0.00018763
ARHGAP27	1764.45	0.820237	0.0818952	0.000189237
PLEKHA4	330.674	1.02553	0.153371	0.000190045
KDM6A	1126.37	0.829233	0.0850759	0.000191664
CYB5D2	88.5747	-1.38074	0.277172	0.000192474
PAN2	612.184	-0.878741	0.102549	0.000198234
SLC29A3	263.193	1	0.145137	0.000200715
FMO4	126.798	-1.16821	0.204302	0.000201563
PITPNM2	350.783	0.941889	0.125078	0.000205807
JDP2	303.716	-0.972513	0.135823	0.000206656
TRAPPC2	256.446	0.984597	0.1401	0.000207507
RPS28	4971.78	0.872761	0.10117	0.000210102
VILL	538.973	-0.904121	0.11253	0.000214509
CDR2L	529.277	0.946769	0.127667	0.000216301
CRYBG2	953.442	0.845124	0.091835	0.000217203
ZNF621	1129.45	0.831959	0.0873121	0.000219022
RAP2B	574.154	0.874781	0.10246	0.000219934
ADCK5	127.542	-1.19228	0.214765	0.000221761
CROT	319.14	-0.964683	0.13432	0.000222676
EPCAM	16170.5	0.776659	0.067888	0.000224522
RSL1D1	4234.49	0.754772	0.0601479	0.000225448
IRX3	128.221	-1.24163	0.23263	0.000227297
VPS37B	409.941	0.964686	0.134598	0.000228227
RWDD2B	220.529	-1.04414	0.162952	0.000229166
ZNF577	337.203	-0.946109	0.128209	0.000230107
STK31	511.994	-0.889018	0.108048	0.000232
ADAMTSL5	268.284	-0.983972	0.141843	0.000233899
CRY2	1158.97	0.814492	0.0816039	0.00023485
ANG	464.243	0.928405	0.122324	0.000235817
ITPKC	1740.28	0.828489	0.0868013	0.000241627
ARHGAP19	381.354	0.940781	0.126897	0.0002426
SH3YL1	1885.21	0.777388	0.068765	0.000246526
RPS9	11666.6	0.819311	0.0840719	0.000250561
CELSR1	642.235	-0.871595	0.103052	0.000254676
BMT2	218.582	1.06991	0.174357	0.000255716
MRPL12	75.1584	-1.33475	0.269693	0.000256759
MIPEP	378.968	-0.942074	0.128488	0.000257805
SART3	1246.06	0.807533	0.0801124	0.000258853
IRF7	212.377	1.09482	0.183572	0.000259903
C6orf47	235.164	-1.0085	0.15283	0.000266248
PHETA2	210.289	-1.00975	0.153329	0.000267317
BRD2	4385.87	0.751213	0.0600235	0.000270523
SPRED2	1104.66	0.805073	0.0795449	0.000272669
PDLIM1	2652.12	0.812746	0.0824424	0.000280244
GSTA1	1278.29	-0.852973	0.0970194	0.000281331
EPHX2	1814.59	-0.810706	0.0817476	0.00028242
SPRY1	244.468	0.995289	0.148786	0.000285719
RSL24D1	1423.31	0.824893	0.0870904	0.000287929
RPS15A	3563.14	0.808389	0.0811514	0.000290156
WDR44	320.951	0.954543	0.134408	0.000293519
CCDC125	431.811	-0.898445	0.11404	0.000294646
SH3GLB2	716.832	-0.870073	0.103891	0.000299175
CAPN8	475.484	-0.895326	0.113277	0.000303787
TMEM207	311.645	-0.999763	0.151432	0.000304942
HMBS	574.565	-0.885628	0.109779	0.000306098
TMEM139	243.259	-0.983424	0.145618	0.000307262
TTC1	1091.39	0.820319	0.0860237	0.000308427
GPBP1	2764.36	0.822108	0.0866819	0.000309591
BAG2	340.897	0.956194	0.135779	0.000311929
PANK1	639.349	-0.865363	0.10283	0.000314296
PPP1R10	834.633	-0.831154	0.090367	0.000315502
RB1CC1	1170.37	0.908024	0.118599	0.000316707
PPIL1	497.72	-0.893086	0.113365	0.000324009
GPATCH1	629.48	0.882143	0.109473	0.000328944
POMP	1437.75	0.849191	0.0975568	0.00033394
TOMM34	1968.01	-0.805866	0.0815807	0.000335197
ICMT	973.506	-0.830674	0.0909057	0.000342788
PPP2R2A	1256.11	0.806202	0.0820166	0.000347936
SNX11	676.446	0.850218	0.0983415	0.000350516
DNAJA2	1232.5	0.802595	0.0808317	0.00035443
PTPN23	1190.01	0.812287	0.0846519	0.000363648
FOPNL	509.766	0.897195	0.116502	0.000370369
SLC38A10	692.593	-0.863989	0.104119	0.000371718
UBE2R2	1870.83	0.780848	0.0731942	0.000375795
SF1	3514.76	0.755531	0.0637754	0.000378526
ATP6V1E1	1945.3	0.78554	0.0750978	0.000382661
ECHDC1	644.282	-0.856737	0.102008	0.000388236
NDOR1	110.57	-1.19686	0.230646	0.000401099
HSPB1	251.694	1.02081	0.164375	0.000402554
PLEKHM1	345.066	0.94082	0.134416	0.000412783
MED8	661.521	0.844779	0.0984383	0.000421685
POLDIP2	3707.17	-0.755015	0.0644612	0.000424689
TRAK1	3256.68	0.758656	0.0658554	0.000426193
NOP53	7918.7	0.836338	0.0953264	0.000427698
GTPBP1	1541.57	0.783636	0.0753621	0.00043071
FBXO17	1152.88	0.836928	0.0956184	0.000432221
ZNF160	1272.39	0.839058	0.0965401	0.000435262
SAMD4B	2066.52	0.79786	0.0810878	0.000442982
SLC35A2	989.857	0.807714	0.0848681	0.000446085
OGFR	1489.38	0.836731	0.0960207	0.000452313
ANKRD9	512.046	0.914586	0.125722	0.000453874
ATIC	1924.76	-0.778903	0.0740282	0.000457003
ALDH4A1	141.356	-1.08517	0.191491	0.000461781
SMUG1	368.795	-0.949334	0.139498	0.000463385
KRBOX4	195.192	1.0336	0.172408	0.000473158
SLC35C1	246.196	-0.958101	0.143573	0.000478117
FAM20C	665.012	-0.877129	0.112468	0.000481449
CLCC1	425.559	0.885342	0.115694	0.00048312
XAB2	896.899	0.83059	0.0946601	0.000484799
TMEM38A	139.226	-1.11629	0.204957	0.00048649
UGGT2	447.777	-0.948815	0.140359	0.00048818
MAX	946.399	0.811013	0.0872023	0.000489868
AMER1	309.089	-0.918105	0.128582	0.00049325
C6orf120	388.601	-0.908111	0.124759	0.000494946
THNSL1	302.233	-0.941452	0.137646	0.000496643
UCK1	340.223	-0.90651	0.12424	0.000501745
UNC5B	2267.2	0.768396	0.0708759	0.000503446
TIMMDC1	476.54	-0.87506	0.112401	0.000506904
LMNA	2544.1	0.81053	0.0874159	0.000508644
RPS21	15556.4	0.790563	0.0797542	0.000510396
CSNK1E	993.694	0.821519	0.0918208	0.000513908
CLIC1	8463.26	0.757365	0.0673432	0.000535358
MYL12A	2890.37	0.761834	0.0691388	0.000537203
A2M	1512.3	-0.791334	0.0807355	0.000540903
WDR5B	216.459	-1.02518	0.172492	0.00054278
UBE2I	954.882	0.819229	0.0922387	0.000552288
ZNF473	503.31	0.862116	0.109163	0.000554236
RPS15	5056.98	0.821386	0.0932127	0.000560096
NEK9	1181.34	-0.789755	0.0807811	0.000564022
RAB5A	1034.33	0.818021	0.092198	0.000567995
RPS6KA1	1177.27	0.806955	0.0879247	0.000574045
WIPI1	504.763	0.8545	0.106885	0.000576084
N6AMT1	300.471	-0.919259	0.132665	0.00058222
KBTBD7	184.296	-0.997197	0.163668	0.000586321
MYO5C	568.049	-0.855501	0.107426	0.000588373
MCM5	796.253	0.824991	0.0953415	0.000592481
VAT1	4466.93	0.756404	0.0681293	0.000594541
TMEM82	125.947	-1.0989	0.204246	0.000598658
RTN4IP1	111.085	-1.14877	0.224254	0.000604846
PLSCR1	582.795	0.8389	0.101016	0.000606913
MISP	770.268	0.854961	0.107424	0.000611046
SPATA20	3961.32	-0.764072	0.0712745	0.000613114
PRNP	542.394	0.84165	0.102406	0.0006236
NETO2	279.03	-0.932935	0.138895	0.000625709
PRRC1	2435.13	0.776924	0.0766375	0.00062782
CPNE7	170.684	-1.03492	0.179885	0.000632075
TSPAN14	1745.1	0.769736	0.073887	0.000634208
TTF1	263.562	0.93297	0.139174	0.000636341
RPLP0	24673	0.745744	0.0643146	0.000638476
RPL18	14766.8	0.791837	0.0827932	0.000640618
BRD4	1429.51	0.784538	0.0799627	0.000644922
TRMT61A	364.497	0.909061	0.129925	0.000649242
SFXN3	1785.03	-0.776611	0.0768639	0.000651411
BORCS7	267.304	-0.980826	0.158797	0.000655752
RABAC1	106.206	1.11693	0.213599	0.00066227
H2BC8	132.625	1.09824	0.206197	0.000664458
TMEM11	442.547	0.875173	0.116967	0.000677724
PAFAH1B1	3115.12	0.750638	0.0668323	0.000682207
PCSK6	691.586	-0.828029	0.0981238	0.000691215
SFN	390.585	0.903705	0.128858	0.000695755
BPHL	536.882	-0.860154	0.111814	0.000714326
COQ9	806.153	-0.811816	0.0922837	0.000723763
RPS3	69435.6	0.759043	0.0709566	0.000730897
ANXA7	3155.62	0.746625	0.0659125	0.000733294
TSTD1	160.423	-1.0767	0.200767	0.000738127
FAM151A	158.149	-1.01875	0.177134	0.000742963
SMG7	2725.36	0.754171	0.0691645	0.000745397
DDX24	2313.93	0.749605	0.0673349	0.00074784
PIGO	644.828	-0.832845	0.101862	0.000770145
NOL3	407.475	0.898577	0.128899	0.000775174
PPIC	376.082	-0.884347	0.123134	0.000780218
PUS7L	493.576	-0.936561	0.144814	0.000785307
CENPBD1	319.916	-0.90902	0.13355	0.000787863
MEGF9	397.914	-0.880631	0.122022	0.000795563
CDC6	703.471	0.820639	0.0973298	0.000800738
RAB11A	2406.74	0.774638	0.078454	0.000803352
IL17RB	947.651	-0.792377	0.0858167	0.00080597
VPS9D1	119.87	-1.08618	0.207452	0.000808594
RPL27A	17278.2	0.742876	0.0654021	0.000813851
CRTC2	615.051	0.84027	0.105785	0.000816489
CA2	122.957	-1.12565	0.224301	0.000827088
DHX40	612.554	0.831539	0.102444	0.000832449
AKAP10	1075.88	0.810125	0.0936148	0.000843178
C6orf132	721.098	0.82511	0.0999582	0.00085127
SPSB1	479.156	0.889795	0.126918	0.000853976
BEX3	808.844	-0.818584	0.0972913	0.000856684
SLC1A3	1157.82	-0.793045	0.0866567	0.000859391
BAZ2A	4148.2	0.738057	0.0638049	0.000867529
CSDE1	10880.8	0.740955	0.0650948	0.00087299
ZHX2	193.82	1.00128	0.173857	0.000878481
TRMT112	1104.9	0.790966	0.086033	0.000883972
C1orf210	246.098	-0.930808	0.144548	0.000889474
ZNF227	384.396	0.87038	0.119355	0.000892239
BCL9	586.391	-0.84366	0.108264	0.000897785
NUP153	1974.08	0.800629	0.0905251	0.000909
NGDN	666.84	0.817532	0.0976849	0.00091184
ZBED8	118.361	-1.0822	0.208988	0.000914692
HNRNPC	5272.94	0.737523	0.0641292	0.000917544
AFF4	3973.53	0.769667	0.0777382	0.000926132
VAC14	831.832	-0.813792	0.0963691	0.000934756
MRPL10	3289.97	0.750993	0.0699528	0.000937641
MFSD13A	203.991	-0.966586	0.160824	0.000940529
IFNGR2	900.049	0.812029	0.0957061	0.000943418
TBC1D23	1094.42	0.842098	0.108394	0.000946307
DDX39B	2315.91	0.765754	0.0762481	0.00095209
RPS4X	25662.9	0.737346	0.0643048	0.00095789
SPG11	1077.28	-0.794677	0.0886827	0.000963747
STAU1	6539.7	0.730816	0.0617072	0.000966698
MTSS1	451.215	-0.843241	0.109434	0.000984458
AMPD2	521.733	0.842206	0.109028	0.000987431
EFR3A	708.9	-0.847451	0.111338	0.000993391
BTF3	8786.48	0.737455	0.0647691	0.0010024
RPL37A	19938.2	0.76252	0.0755153	0.00101145
FURIN	580.513	-0.850458	0.112942	0.00101752
LRRC42	788.688	0.80027	0.0919833	0.00103895
NFXL1	313.996	0.899463	0.134433	0.00104828
HMGCR	6222.63	0.761668	0.0756225	0.00106076
STIP1	3957.71	0.751641	0.0713457	0.00106389
TMEM117	372.046	-0.902764	0.136459	0.00108915
DECR1	558.326	-0.829812	0.10517	0.00109552
RETREG3	1324.4	0.775286	0.081812	0.00109872
C11orf86	55.9376	1.27619	0.298261	0.00112143
PEX10	129.004	-1.07113	0.209966	0.00112472
ME3	196.923	-0.988546	0.174382	0.00112801
JPT1	882.134	0.785095	0.0865033	0.00113131
ZCCHC17	391.76	0.870929	0.123759	0.00113796
CEP89	334.835	0.890406	0.132297	0.00114464
STK40	967.763	0.796378	0.0915782	0.00114797
PEX7	110.278	-1.08011	0.214624	0.00115132
RPL10A	12954.4	0.737579	0.0661813	0.00115468
COG4	1148.93	-0.789393	0.0886672	0.00115804
HDAC3	1377.53	0.773685	0.082029	0.00116824
ELOVL7	540.313	-0.830829	0.107011	0.0011785
OCA2	118.478	-1.05829	0.206527	0.00119579
SH3BP5L	538.982	0.832285	0.10797	0.00119927
PTRH2	548.981	0.83598	0.109656	0.00120626
PRMT3	259.107	-0.948583	0.158936	0.00121326
ADGRA3	783.284	-0.804385	0.0959189	0.00122026
MARCKSL1	1458.85	-0.819917	0.102819	0.00122378
DDRGK1	992.119	0.794043	0.0915006	0.0012273
REEP1	558.629	-0.825402	0.105665	0.00124517
KXD1	643.565	0.815009	0.101335	0.00126697
RPL28	8166.35	0.790378	0.0905278	0.00127063
EPOR	118.65	-1.05415	0.206774	0.00127429
SIRT7	581.504	0.829252	0.107956	0.00130378
NDUFB1	426.618	-0.846535	0.115792	0.00131869
ZNF395	1131.28	0.766162	0.0802486	0.00132243
NEPRO	1033.18	0.792038	0.0918084	0.00133741
SUMF1	471.676	-0.837823	0.112145	0.00134869
CCSAP	260.065	0.899474	0.139574	0.00135622
PDHB	909.443	-0.780225	0.0866958	0.00136
EEF1E1	85.8546	-1.13032	0.242296	0.00137136
DRG1	945.598	0.775141	0.0844936	0.00137514
PPP3CA	468.033	-0.828904	0.108526	0.00137896
GDI2	10128.9	0.733749	0.0662682	0.0013828
RBP5	116.73	-1.07575	0.218684	0.00138665
HMGA1	1859.19	0.762635	0.079219	0.00139436
HLA-A	3404.81	0.747014	0.0723752	0.00140603
CNBP	4598.45	0.733989	0.0666584	0.00141385
ING1	327.855	0.865148	0.125673	0.00142178
VIPR1	476.162	-0.848255	0.118137	0.00142578
BET1L	1327.02	0.763562	0.0801843	0.00142979
FAF2	2439.01	0.747669	0.0730794	0.00143782
PPP2CB	1332.67	0.798921	0.0962007	0.0014459
RPL14	11363.8	0.727597	0.0641692	0.00144995
TMEM126B	881.434	-0.792501	0.0934096	0.0014621
LSM11	416.272	0.844173	0.116761	0.00146617
FMOD	2139.03	0.760956	0.0793214	0.00147433
DHRS11	1669.58	-0.756662	0.0775712	0.00148666
SMC1B	163.798	-0.969564	0.173789	0.0014908
CHI3L1	151.65	-1.11242	0.23837	0.00149494
MBD4	796.105	0.796605	0.0956601	0.00149908
GOLPH3L	607.109	0.80677	0.100313	0.00150737
EEF2	49865.3	0.7544	0.0767372	0.0015199
PSMG2	1242.02	0.791769	0.0937544	0.00153248
FERMT1	714.032	-0.800466	0.0977384	0.00154088
DENND1C	789.994	0.806846	0.100743	0.00154932
BDP1	1648.24	0.822323	0.107934	0.00155781
SMO	786.117	-0.795041	0.0955873	0.00156208
ANXA9	650.853	-0.80964	0.102258	0.00156636
SLC25A3	11863.4	0.719092	0.0610617	0.00157064
FUT8	659.652	-0.802044	0.0988771	0.0015835
ORC6	393.461	0.853934	0.1226	0.00159209
MAN2C1	653.545	-0.802096	0.0989783	0.00159639
LPAR1	191.364	0.935796	0.15995	0.0016007
STK35	1828.58	0.742129	0.0717297	0.00160502
STAT6	840.743	-0.787699	0.0925742	0.00160936
PPA2	457.303	-0.831394	0.112564	0.00161804
CEP76	336.29	0.884915	0.13731	0.00163114
SEPHS1	882.358	-0.783559	0.0910826	0.0016532
ATG101	197.004	0.951864	0.168337	0.00165763
CCDC84	963.902	0.775662	0.0876041	0.0016621
RTN4	4298.15	0.743106	0.0726629	0.00166657
CNTNAP2	892.106	-0.781706	0.090402	0.00167104
GOLGA3	2141.1	0.750542	0.0761119	0.00167551
CNP	993.394	-0.779719	0.0895313	0.00167999
COQ2	148.446	-0.994505	0.188652	0.00169352
ACOT9	589.699	0.815082	0.106141	0.0017026
TPM4	2364.7	0.735773	0.069604	0.00170717
OSBPL10	758.828	0.800596	0.0999635	0.00173501
UEVLD	440.685	-0.863487	0.129188	0.00174437
GTF2B	430.391	0.828359	0.113156	0.00178212
C1orf131	475.816	-0.846613	0.12244	0.00181569
CLIC4	1000.69	-0.791696	0.0967628	0.00182058
TUBB2A	161.963	1.00282	0.195712	0.00183039
ARF6	1614.45	0.764002	0.0839163	0.00183531
TMEM127	1221.34	-0.755496	0.0799933	0.00185504
RPS7	14627	0.745238	0.0751861	0.00185997
FAM24B	95.8395	1.07521	0.22999	0.0018649
SSR3	3024.32	0.76324	0.0837434	0.00188468
CXADR	1603.78	0.778767	0.0914639	0.00192487
MAML2	355.271	-0.846129	0.123449	0.00194016
OGDHL	564.244	-0.826256	0.114114	0.00194527
UBA6	977.357	0.830668	0.116306	0.00196067
CTSS	328.894	0.871398	0.135859	0.0019813
RBP4	9161.67	-0.71891	0.0635383	0.00199165
AP1S3	268.816	-0.89435	0.146926	0.00200722
SS18L1	1178.68	0.766485	0.0863226	0.00202289
ANGEL1	467.404	-0.825705	0.1146	0.00203863
FABP1	2625.57	-0.736022	0.0719201	0.00204389
PSEN2	148.87	-0.962196	0.179688	0.00204915
RFXANK	200.689	-0.92746	0.163328	0.00205972
HAUS5	188.195	-0.942379	0.170537	0.00207033
MLN	62.1632	-1.23897	0.312411	0.00210221
DIPK2A	491.293	0.832946	0.118476	0.00210753
MKRN2	789.035	0.783665	0.0951307	0.00212364
ANXA6	217.121	-0.939167	0.169668	0.00213977
MAFK	374.899	0.87736	0.140098	0.00214515
RPS19	20872.2	0.758906	0.0833489	0.00215054
EIF4H	3165.84	0.715574	0.0626813	0.00216139
NDUFAF3	319.835	-0.913287	0.157607	0.00216682
UBE4B	1566.08	0.73486	0.0720001	0.00218855
ZNF436	346.929	0.843779	0.124344	0.00219399
TRUB2	428.548	-0.835262	0.120689	0.00223239
SLC2A4RG	1403.25	-0.807243	0.107183	0.00223792
MORF4L2	3714.45	0.719527	0.0649292	0.00224346
ELK4	648.869	0.858075	0.132047	0.00225462
MITD1	358.512	-0.851874	0.129103	0.00226023
PLEKHH1	1356.17	0.747276	0.0786002	0.00227712
FAXDC2	364.705	-0.837076	0.122216	0.00229969
SLC35A5	437.124	-0.841124	0.124389	0.00231677
RPL5	25342.3	0.698344	0.0550599	0.00232246
TSC2	702.083	-0.789257	0.0993374	0.00234527
USP48	1303.98	0.772313	0.0911402	0.002351
ZC3HAV1L	245.221	0.879774	0.143424	0.00236246
CHPT1	971.916	-0.77489	0.0924658	0.00237966
TFF3	467.178	-0.832777	0.120728	0.0023969
CDCP1	1239.22	0.750271	0.0807027	0.00242005
RAE1	2149.55	0.74474	0.0780254	0.00243166
LZTS3	244.865	0.889906	0.149	0.00243748
G3BP2	3431.51	0.744868	0.0782576	0.00244335
HLCS	398.17	-0.821869	0.116249	0.00247293
EPB41L5	1378.13	0.771052	0.0913293	0.00247887
BLOC1S2	752.903	0.803088	0.107094	0.00249074
WDR77	161.409	-0.95617	0.182327	0.00250859
SAYSD1	186.828	-0.911557	0.160993	0.00256254
NR1H3	950.92	-0.769927	0.091182	0.00256856
TMEM81	51.6714	1.29397	0.34955	0.00257459
AFTPH	1781.88	0.760028	0.0863289	0.00258664
NINL	233.38	-0.903186	0.156958	0.00259267
BAX	432.058	-0.822267	0.117358	0.00262918
ERCC2	487.057	-0.804357	0.108552	0.00264139
USP27X	190.911	-0.911869	0.161765	0.00264749
ZNF76	366.891	-0.850064	0.13136	0.00265363
KCNJ8	186.634	-0.93489	0.17357	0.00268444
CMBL	613.733	0.795361	0.104441	0.00269062
DOCK1	983.657	-0.752593	0.0832901	0.00270302
NAP1L4	3222.62	0.71285	0.0635986	0.00270925
ABLIM1	2533.74	0.73046	0.0725518	0.00273433
HIGD1A	1406.2	1.0373	0.226117	0.00274708
C11orf49	385.824	0.828917	0.121954	0.00275346
STYXL1	383.531	-0.864019	0.139701	0.00277272
TP53INP2	518.696	0.795945	0.105702	0.00277916
CBLL1	630.523	0.801914	0.108724	0.00279205
RHBDD3	380.1	0.823239	0.119467	0.00280495
KAT7	2169.21	0.745374	0.0806423	0.00284377
MARS2	158.943	-0.958671	0.188005	0.00285682
HCAR1	290.718	0.849641	0.133163	0.00286335
CREBRF	1179.46	0.794335	0.105479	0.00288959
TNFRSF12A	502.89	0.833102	0.125064	0.00290273
GALNT12	121.525	-0.981233	0.199843	0.0029159
PTGR1	1386.53	0.74002	0.0783086	0.00293573
BLZF1	462.495	0.832058	0.125063	0.00296902
COPA	5606.6	0.703082	0.0598684	0.00299583
RPL29	9817.27	0.744324	0.0809605	0.0030363
CNOT4	569.233	0.800602	0.109737	0.00306344
TLCD1	178.999	-0.928945	0.175061	0.00307025
COMMD8	101.476	-1.03369	0.228722	0.0030976
AIMP2	154.884	-0.930968	0.176501	0.00310447
CDK5	137.159	-0.95652	0.189633	0.00313194
C12orf57	177.957	0.916201	0.169188	0.00313884
SUPT6H	5703.71	0.702292	0.0599461	0.00314574
DBNL	736.47	-0.769931	0.0945591	0.00315958
NAT14	136.416	-0.987588	0.205991	0.00316652
DBNDD1	476.582	0.820806	0.120685	0.00317346
PANK2	743.637	0.777387	0.0985811	0.00318738
PEX6	295.449	-0.871341	0.146759	0.00320831
RPP25	303.2	-0.89531	0.159218	0.00322927
SH2D3A	356.985	0.85041	0.136369	0.00325037
MPC1	430.695	-0.813211	0.117284	0.00325741
ZNF764	161.578	-0.934476	0.17961	0.00326445
SERINC1	3935.61	0.736965	0.0781968	0.00328565
KCTD18	230.198	-0.867605	0.14549	0.00329273
INPPL1	4203.31	-0.732872	0.0761813	0.00329983
TSPAN31	354.704	-0.838825	0.130959	0.00332121
DECR2	279.646	-0.85238	0.138114	0.003357
PRR3	367.559	0.82745	0.125434	0.00337858
TP53I3	90.7982	-1.02786	0.229201	0.00338581
RAB3IL1	131.419	-0.978125	0.203723	0.00340755
FGD3	476.042	-0.807767	0.115494	0.00341482
RNF26	855.652	-0.755237	0.0882659	0.00342208
SLC23A3	342.959	-0.838514	0.131525	0.00342936
C17orf75	209.734	-0.8803	0.153336	0.00343667
ZSCAN30	284.104	-0.852659	0.13905	0.0034513
FAM160B1	426.209	0.818559	0.12138	0.00346594
CAP1	1471.78	0.72863	0.0746639	0.00347327
RAB21	906.648	0.77029	0.0963424	0.0034806
TRNT1	235.77	-0.883201	0.155271	0.00349531
GTF2F1	1505.56	0.75771	0.0899738	0.0035027
RNF7	758.147	0.771363	0.097128	0.0035101
IFT20	828.927	0.75811	0.0902256	0.0035175
PPIL4	798.827	0.786069	0.104804	0.00353228
H4C8	110.181	0.979187	0.205637	0.00356192
RPL27	16339.1	0.716255	0.0685758	0.00358425
KRT10	219.724	0.887406	0.158828	0.00362927
PARS2	121.347	-0.978486	0.207036	0.00365229
SPATS2L	2900.53	0.720717	0.0714246	0.00365996
PFAS	264.43	-0.848576	0.138753	0.00368299
RPS16	18858.5	0.724248	0.0733626	0.00369837
RPS6	27807.3	0.709887	0.0658674	0.00370609
OAF	1518.95	-0.760245	0.0924449	0.00372155
RNF113A	345.951	0.822	0.12506	0.00373701
DIPK1A	212.263	-0.914329	0.173886	0.00375249
MOSPD1	587.867	0.805308	0.116409	0.00376026
SF3B4	951.957	0.75347	0.0891297	0.00378365
HJURP	469.877	0.787669	0.107261	0.00379146
SLC31A1	1935.8	0.741125	0.0827119	0.00382277
ZFR	2665.29	0.732612	0.0782049	0.0038306
TIMM8A	171.087	-0.907928	0.171072	0.00383842
HGSNAT	719.037	-0.762871	0.0947277	0.00390173
ENTR1	496.582	-0.811447	0.120783	0.00391775
STX10	233.197	-0.860882	0.147285	0.00393387
PFDN4	539.65	0.845954	0.140042	0.00401545
C2orf49	844.647	0.753807	0.0909516	0.00406507
CES2	796.664	-0.758158	0.0933202	0.00407342
CREB3L4	137.997	-0.934904	0.18875	0.0040985
GNPTG	409.273	-0.800609	0.116359	0.00413199
EIF2AK3	681.673	0.771777	0.100997	0.00419923
CASC3	2135.52	0.710428	0.0680807	0.00424166
CAMSAP1	750.147	0.752604	0.0909793	0.00425019
TSR1	1164.39	0.738498	0.0833512	0.00425873
BBS10	218.842	-0.876473	0.158501	0.00426733
ACBD3	918.246	0.7558	0.092962	0.00428455
CPNE2	710.187	0.767665	0.0994972	0.00431046
TMEM94	2540.89	0.732776	0.0806806	0.00434522
ACOT13	738.358	-0.761898	0.0966185	0.00435395
C12orf49	2073.4	0.720476	0.0741201	0.00438023
TOMM7	2884.73	0.732398	0.0808927	0.00439789
SBNO1	2070.61	0.730807	0.0800993	0.0044335
USP3	760.651	0.753812	0.092772	0.00445133
SH3BGRL3	411.668	0.827502	0.133275	0.00446915
PMS1	294.042	-0.884656	0.164797	0.00448701
MRI1	116.342	-0.991108	0.223942	0.00453193
ZNF749	299.283	0.838797	0.140913	0.00462336
ERAP2	375.884	0.795832	0.117236	0.00463266
SLC1A4	301.78	-0.833413	0.1383	0.00466064
PATL1	1805.54	0.717579	0.0738278	0.00466998
PPIH	201.002	0.897107	0.173782	0.00467931
SYNJ2	1418.52	0.72192	0.0765837	0.00473589
ID2	3341.13	0.698203	0.0633574	0.00476435
MRPL1	244.742	-0.866285	0.157521	0.00480235
CTNNA1	11416.9	0.690205	0.0590573	0.00483099
EIF3D	5190.74	0.710419	0.0704186	0.00484057
MAP7D1	274.431	0.846364	0.146829	0.00486936
PRSS1	71.7149	-1.09831	0.288684	0.00488859
PDCL	384.717	0.798312	0.120083	0.00494647
PSMB1	2925.73	0.700833	0.0652206	0.00495611
ST13	4710.76	0.703304	0.0666127	0.00496574
TMEM223	169.705	-0.929076	0.193871	0.00499465

## Sheet: Caco-2, oxyquinoline
Gene	baseMean	log2FoldChange	lfcSE	svalue
ACADSB	1713.91	-1.345	0.0840457	0
ADH4	539.46	-2.20237	0.133056	0
CFTR	3756.56	-2.01129	0.0736148	0
DEFB1	254.141	-1.94433	0.151569	0
GLUD1	10560.8	-1.37216	0.0629208	0
GPAM	1912.89	-1.60513	0.0860469	0
GSTA2	2334.91	-1.35803	0.0783223	0
HEPACAM2	2347.66	-1.69141	0.0722883	0
NIPSNAP1	2157.84	-1.28013	0.071719	0
OAT	10880.3	-1.26091	0.0726302	0
ORM1	552.709	-1.70818	0.109098	0
PDGFRB	503.497	-2.05967	0.121572	0
PEG10	27935.7	-1.06449	0.057304	0
SCGN	759.483	-1.74589	0.099523	0
SLC22A9	411.677	-1.61631	0.123691	0
SLC38A4	918.441	-1.69274	0.108792	0
SLC7A2	2480.18	-1.59025	0.0818	0
ST6GAL1	5733.4	-1.13811	0.0635272	0
SLC2A1	9973.59	2.77243	0.0647835	1.495e-251
CKB	25333.5	2.90846	0.0704369	2.84586e-240
HK2	2472.26	3.2051	0.0844707	6.6335e-213
SLC2A3	26883.5	3.25116	0.0889876	6.50514e-199
EMP1	2853.76	3.01802	0.0871197	2.45196e-173
ENO2	1438.01	3.24139	0.095851	9.08412e-171
PFKFB4	1480.01	3.30219	0.100565	1.60419e-162
GPRC5A	6968.5	2.7557	0.0825753	4.69801e-154
NDRG1	14086	2.47018	0.0729418	4.71291e-149
PFKP	1659.87	3.04997	0.096967	2.4536e-144
P4HA1	7009.9	2.65249	0.0823484	6.72703e-141
PLOD2	4795.26	2.3903	0.0750275	9.70007e-130
LDHA	26906.5	2.53108	0.0810538	4.23841e-129
PDK1	1411.9	2.77919	0.0920677	2.29169e-127
ITGA5	531.077	3.8639	0.140845	9.99235e-122
SORL1	9417.32	2.0113	0.0635887	2.74001e-113
BNIP3	2431.91	2.71931	0.0988102	2.40366e-105
ARHGAP45	935.302	3.02329	0.112981	5.84591e-105
CEACAM1	1741.05	2.4159	0.0854313	9.2412e-104
PAM	4150.32	2.19828	0.0762078	2.26708e-101
SLC6A8	878.507	2.97422	0.118518	2.71147e-92
ERO1A	3975.94	2.05159	0.074844	2.00061e-87
ENO1	20610.5	1.91952	0.0682594	6.634e-87
DUSP5	1045.14	2.74176	0.111396	1.91503e-85
PGK1	14864.8	1.99014	0.0746282	4.84621e-81
GPI	6364.07	1.67086	0.0602539	1.42276e-74
SPAG4	473.558	3.03166	0.141356	4.53197e-69
P4HA2	1946.64	1.92186	0.079892	7.58977e-65
FAM13A	1892.36	1.93322	0.0819056	7.0535e-63
SERPINB6	2047.95	1.93602	0.0830165	1.53602e-61
PAG1	4699.44	1.9004	0.0814657	1.29448e-60
SLC36A1	4783.77	1.73446	0.0715703	5.78048e-60
FXYD5	520.042	2.49186	0.1188	1.08547e-59
STC2	3393.08	1.84071	0.0785721	2.61466e-59
KDM3A	4527.55	1.84357	0.0796131	2.66532e-58
GAPDH	33731.5	1.55695	0.0616747	7.76664e-58
PPP1R15A	2663.11	1.87996	0.0823044	1.52238e-57
ALDOC	2076.96	1.76161	0.0756655	1.48314e-56
BHLHE40	1167.45	2.17871	0.103213	8.65208e-56
LRP4	1241.54	1.87756	0.0839877	2.40866e-55
INSIG2	982.364	1.95453	0.0894997	8.30227e-55
MYBL2	3465.49	1.63021	0.0689708	6.39316e-54
PVR	4213.99	1.56246	0.0658711	6.41309e-52
CDT1	918.453	1.99779	0.0955041	1.87435e-51
GBE1	434.51	2.49596	0.129867	5.75854e-51
LDLR	3845.8	1.57618	0.0673684	9.61962e-51
SLC15A1	835.929	1.98261	0.0950272	1.3698e-50
TFAP2C	465.225	2.70189	0.144104	1.88907e-50
LOX	399.689	2.50952	0.132091	4.97824e-50
EPHA2	726.185	2.09425	0.105225	8.72922e-49
ATP8B2	442.991	2.64634	0.15018	4.92369e-45
PKM	11480.4	1.38392	0.0582348	1.01631e-44
MRPS26	1543.5	1.67704	0.0822612	2.17244e-42
GPX3	2709.09	1.50221	0.0696245	1.0373e-41
DDIT4	381.178	2.36482	0.136107	3.96029e-41
TK1	1457.78	1.7485	0.0904107	8.54266e-40
TMBIM1	7422.18	1.43159	0.0660236	1.61449e-39
CEACAM6	1921.97	1.67289	0.0854319	3.9723e-39
BNIP3L	1536.96	1.72459	0.0895773	6.6671e-39
AKAP7	2428.74	1.52697	0.0742651	1.09852e-38
GPR157	1289.11	1.75816	0.0933404	2.96716e-38
ESYT2	4501.82	1.41617	0.0664427	9.4397e-38
TNFRSF10D	932.439	1.83392	0.100265	2.30742e-37
LGI4	1009.45	2.0795	0.120531	3.77343e-37
FUT11	419.774	2.22034	0.132641	7.26676e-37
SLC11A2	5982.93	1.4996	0.0743692	1.23064e-36
RRM2	3241.62	1.41811	0.0684456	3.6118e-36
CLIC5	1994.41	1.49373	0.0749992	8.23313e-36
PFKFB3	1234.12	1.63097	0.0875096	4.17934e-35
TSC22D2	1249.21	1.56848	0.0828782	1.34708e-34
TPI1	13458.8	1.30935	0.0612933	2.98532e-34
SLC2A14	810.217	2.14146	0.135858	1.16225e-32
RHPN2	1802.25	1.5869	0.0885648	6.98278e-32
EFNA1	3213.38	1.5641	0.0876798	5.30875e-31
NFE2L1	14504.4	1.19475	0.0548268	1.01516e-30
ATAD2	1928.14	1.41031	0.0746044	1.94394e-30
LGALS14	1789.55	1.89311	0.121396	2.38541e-29
SLC20A1	2464.2	1.55145	0.0906221	9.56212e-29
CCND1	2560.97	1.40299	0.0768456	1.83034e-28
MAFF	276.228	2.49213	0.179302	2.77145e-28
DSP	17631.4	1.35289	0.0728175	5.24594e-28
GDF15	295.894	2.17301	0.151369	9.62835e-28
E2F1	1198.68	1.45027	0.0830475	1.89012e-27
IMPAD1	1689.01	1.42067	0.0811485	7.48652e-27
MTHFD2	2159.52	1.46031	0.0864926	2.7609e-26
VEGFA	4900.31	1.22682	0.0645295	1.43637e-25
F2RL1	4799.1	1.38676	0.0827496	1.62095e-24
PLAC8	306.35	1.90469	0.136682	3.65137e-24
GOLGA8A	735.1	1.50402	0.0956635	6.86186e-24
OPTN	3539.91	1.52606	0.0981116	1.05224e-23
CEACAM5	605.196	1.5922	0.105957	2.36938e-23
FNDC3B	1394.57	1.32537	0.0788546	4.88127e-23
KLF4	428.792	1.72288	0.122358	1.62656e-22
SYBU	497.807	1.75874	0.127604	3.1001e-22
TINAGL1	716.442	1.61521	0.112268	4.88347e-22
PLIN2	1930.28	1.32973	0.0820376	1.11449e-21
BMP2	1034.69	1.43494	0.0939706	1.69859e-21
GCNT3	375.625	2.25558	0.185443	3.27892e-21
MXI1	1029.91	1.46306	0.0977364	4.26199e-21
TFRC	14669.1	1.13391	0.061726	6.50966e-21
UNC5B	2887.2	1.24237	0.0747434	1.18959e-20
HAVCR1	6201.04	1.14242	0.0639054	2.20484e-20
CDC6	927.232	1.36276	0.08922	3.25483e-20
FAM114A1	847.187	1.51221	0.107228	5.19652e-20
FLNB	22934.9	1.10595	0.0603806	7.46229e-20
FOS	188.285	2.20183	0.188466	1.09223e-19
TNIP1	2412.93	1.22384	0.0747257	1.53511e-19
AQP10	570.032	4.16664	0.420049	2.06901e-19
SLC2A5	425.239	1.84756	0.149292	3.59067e-19
LIN54	807.778	1.38302	0.0944287	4.58528e-19
CHAF1A	699.895	1.43157	0.10062	5.94926e-19
RNF19B	573.269	1.49432	0.109129	8.66725e-19
ZNF488	1644.89	1.23918	0.0788015	1.54902e-18
DSC2	756.155	1.3842	0.096771	2.04108e-18
LSR	5103.6	1.33753	0.0912774	2.58967e-18
KNG1	2425.62	-1.22572	0.0773433	4.04515e-18
TDP2	3758.12	1.17664	0.0721303	4.80005e-18
MMP1	725.814	1.51835	0.115167	6.51983e-18
HPDL	450.335	-1.5394	0.118654	1.15141e-17
GALNT3	2225.44	1.23915	0.081837	1.56897e-17
PNKD	1565.22	1.19749	0.0769134	2.91893e-17
ATF3	195.52	2.16749	0.199705	3.62638e-17
PPP1R13L	671.331	1.40064	0.103303	4.50979e-17
RASSF1	394.512	1.56271	0.124535	5.7697e-17
AMOTL2	3178.4	1.11487	0.0679062	7.60284e-17
PIM1	1242.46	1.2441	0.0849594	1.26862e-16
ZG16	422.105	1.65068	0.137696	1.56483e-16
IGSF3	1528.53	1.16692	0.0756228	2.30606e-16
CRKL	2733	1.19243	0.0789532	2.71926e-16
YEATS2	1754.64	1.19365	0.0792634	3.17929e-16
SERPINA6	408.565	-1.56525	0.128312	3.80428e-16
MALRD1	1103.88	-1.39272	0.106182	4.60477e-16
STON2	368.843	1.57413	0.130132	5.43563e-16
INSIG1	4867.06	1.27148	0.0907091	7.39806e-16
UGT2B15	135.266	-2.21828	0.215826	8.44662e-16
DNAJB9	678.38	1.4494	0.1143	9.52517e-16
CSRNP1	438.357	1.52446	0.12465	1.0837e-15
JUN	351.151	1.55906	0.129387	1.22243e-15
ADAM23	968.494	-1.32163	0.0981896	1.39145e-15
SLCO4A1	563.529	1.43024	0.112787	1.56963e-15
MMP11	264.809	-1.66501	0.144155	1.74904e-15
ITGA2	820.39	1.32747	0.0991861	1.93555e-15
CD55	1969.66	1.28319	0.0939857	2.22522e-15
MCM10	583.08	1.37608	0.106635	2.82498e-15
RIMKLA	738.05	1.32755	0.100249	3.15763e-15
EIF1	6054.53	1.24455	0.0892602	3.53702e-15
GSTA1	1182.96	-1.29641	0.0965163	3.96991e-15
TOR1AIP1	793.069	1.3081	0.0984229	4.48692e-15
DUSP1	292.36	1.61025	0.139894	5.60052e-15
NPC1	1283.47	1.18477	0.0819064	6.20585e-15
CYP2S1	1423.91	1.25673	0.0921797	6.99505e-15
LGR5	294.5	-1.61851	0.1419	7.80096e-15
IQGAP3	1463.27	1.19059	0.0834794	8.79728e-15
PHF1	865.352	1.28321	0.0966193	1.00204e-14
PGAM1	621.273	1.36927	0.109281	1.17876e-14
TMSB10	6200	1.31925	0.102318	1.35422e-14
KIF12	1144.65	-1.28702	0.0978675	1.53192e-14
LDHD	610.522	-1.49495	0.126963	1.71636e-14
FOXJ2	788.501	1.25707	0.0942618	2.16139e-14
JAML	770.29	1.33445	0.105617	2.4678e-14
RBP4	8609.21	-1.06168	0.0675457	2.87271e-14
MXD1	620.088	1.28894	0.100428	3.87317e-14
SEMA3A	467.696	-1.3907	0.11532	4.53619e-14
TM4SF20	467.881	-1.39807	0.116684	5.28832e-14
TMCC1	1211.44	1.28402	0.100337	6.04058e-14
TSPYL2	720.335	1.41297	0.119016	6.84266e-14
CDCA5	948.463	1.24946	0.0958022	7.76981e-14
AGPAT2	1539.33	1.28672	0.101178	8.68953e-14
CHEK1	1346.78	1.14845	0.0812685	9.61605e-14
PDLIM2	696.084	1.26878	0.0986769	1.05596e-13
KDM4B	821.099	1.28652	0.101763	1.17767e-13
ADGRG1	2258.81	-1.20033	0.0893423	1.30405e-13
E2F7	295.439	1.58616	0.146356	1.48027e-13
CYP4F3	366.119	-1.50689	0.135238	1.68751e-13
EHHADH	527.908	-1.3675	0.115042	1.9162e-13
ACCS	332.784	-1.55382	0.142506	2.14847e-13
KLF11	920.621	1.28206	0.102574	2.38313e-13
IL6R	822.294	1.25539	0.098723	2.62431e-13
ULBP2	164.382	1.92511	0.197906	2.89928e-13
RCBTB1	290.035	-1.51562	0.137476	3.17577e-13
OXSR1	2179.96	1.14369	0.0825501	3.45245e-13
CLDN4	5252.86	1.02738	0.0655917	3.777e-13
HILPDA	301.194	1.52732	0.139883	4.11856e-13
GPA33	481.147	1.46801	0.131116	4.4619e-13
UGT2B17	281.46	-1.80727	0.181817	4.83343e-13
DTL	476.709	1.33024	0.110915	5.21073e-13
TMEM92	1271.6	1.16805	0.0871101	6.06848e-13
CDR2	1030.79	1.28721	0.105153	7.02859e-13
GPX2	413.419	1.4347	0.127387	7.54332e-13
FBL	3029.7	1.16719	0.0879175	8.26283e-13
LGALS3	14390.9	0.968739	0.0580409	9.76413e-13
PPP1R15B	2026.07	1.15014	0.0859038	1.07172e-12
ABCG2	277.847	1.57886	0.151416	1.17682e-12
TMSB4X	1215.57	1.44203	0.130735	1.28727e-12
GADD45A	411.885	1.51444	0.141989	1.40443e-12
ZNF367	293.98	1.53933	0.148228	1.77488e-12
RHBG	184.452	-1.68224	0.17043	2.01514e-12
PLEC	4794.12	1.12106	0.0835721	2.29475e-12
BNIP5	154.023	1.78212	0.187033	2.59963e-12
FEN1	1306.11	1.1175	0.0834141	2.93766e-12
SEC24D	1119.77	1.13804	0.0867739	3.29766e-12
ORM2	430.091	-1.38748	0.12623	3.69592e-12
CDR2L	614.048	1.2236	0.101506	4.82101e-12
IPMK	1274.33	1.20986	0.0993843	5.4411e-12
DSG2	2051.88	1.08778	0.0801966	6.7626e-12
EXO1	379.349	1.38945	0.128931	7.59586e-12
WDR72	414.972	-1.34464	0.12209	8.52305e-12
TRIM66	552.246	-1.36665	0.125697	9.46456e-12
TM4SF4	133.757	-1.85557	0.204367	1.04081e-11
GUCA2A	325.424	1.39925	0.13098	1.13471e-11
ELF3	2182.14	1.03273	0.0727733	1.58113e-11
FOXO1	706.873	1.20319	0.10141	1.78068e-11
CYP2C9	173.222	-1.6674	0.1776	1.9807e-11
NR1D1	204.59	1.57112	0.162535	2.45251e-11
TGM2	1256.52	-1.1041	0.085817	3.20796e-11
TNNI2	60.6687	2.66888	0.346296	4.3963e-11
ABCA7	397.408	1.39376	0.134499	4.7106e-11
SLC45A3	451.897	-1.32449	0.123243	5.04966e-11
MYOF	3553.52	1.00641	0.0705803	5.4567e-11
INHA	77.518	2.29652	0.286957	5.87842e-11
GSTA4	436.683	-1.33095	0.125152	6.30753e-11
VARS1	587.762	-1.19733	0.102832	6.74917e-11
MPZL2	4472.07	0.990492	0.0682752	7.68878e-11
ARL15	1022.73	-1.18728	0.101916	8.77396e-11
RNF24	648.797	1.23017	0.109587	9.4304e-11
SLC29A4	590.086	-1.26389	0.117322	1.51034e-10
MAFG	941.363	1.12377	0.0932903	1.63649e-10
PTPRA	3011.23	1.05438	0.081863	1.79809e-10
KLF6	1481.67	1.05472	0.0820772	1.96963e-10
BLCAP	3969.33	0.955063	0.0647452	2.14751e-10
SH3D21	456.424	1.26643	0.119315	2.50809e-10
CLMP	562.888	-1.21143	0.110645	3.16844e-10
TNS1	1145.21	1.06282	0.0844045	3.40718e-10
SLC19A3	2469.07	1.00497	0.0742292	3.64916e-10
JUND	858.537	1.25589	0.118938	3.91619e-10
SNX25	563.651	1.35308	0.136602	4.49189e-10
E2F2	244.566	1.46423	0.156906	4.81989e-10
PNPLA2	993.826	1.08269	0.0888773	5.15301e-10
USP37	600.982	1.14769	0.100517	5.48762e-10
CAPN8	1009.46	1.11395	0.0952701	5.92557e-10
RND3	869.506	1.15047	0.102132	6.40266e-10
CDC25A	483.439	1.19486	0.110251	6.89127e-10
ADH6	292.757	-1.45575	0.157684	7.40525e-10
TMEM39A	1145	1.05256	0.0847412	7.92948e-10
IKBIP	260.547	1.37812	0.144273	9.04654e-10
PCNA	2501.94	1.00815	0.0773091	9.71398e-10
AGAP1	1702.84	1.01497	0.0785964	1.0389e-09
GM2A	2509.41	1.02217	0.0800142	1.10877e-09
KCMF1	1382.08	1.1491	0.103395	1.18157e-09
APELA	224.426	-1.43919	0.156572	1.25406e-09
RBCK1	1711.8	0.978459	0.0724031	1.41002e-09
ME1	2123.76	1.00934	0.0784236	1.59185e-09
TOB1	3868.54	1.0748	0.0905809	1.68512e-09
GBF1	4689.2	0.925663	0.0631219	1.78359e-09
SORBS1	2582.67	0.961373	0.0704121	2.04364e-09
JUNB	195.637	1.47814	0.167183	2.17676e-09
RAD51	303.518	1.37839	0.148582	2.31096e-09
CDC45	334.285	1.30794	0.135536	2.44895e-09
C6orf132	843.58	1.11779	0.100013	2.59148e-09
RBM33	2558.46	0.990156	0.0761903	2.74107e-09
ROR1	330.742	-1.29244	0.133497	3.06165e-09
SULT1C2	1581.49	-1.0849	0.0944507	3.23145e-09
HPX	1098.9	-1.04084	0.086229	3.40652e-09
SEC24A	3279.51	1.03296	0.0850222	3.78459e-09
GRB14	270.588	-1.31846	0.140554	4.23707e-09
RIMS4	511.079	1.18371	0.114828	5.00128e-09
RTN4R	185.188	1.61814	0.199154	6.0942e-09
CEMIP2	712.782	1.09239	0.0980316	6.40122e-09
NOSTRIN	222.428	1.40238	0.158569	7.06746e-09
SPTSSB	843.756	-1.10041	0.100114	7.42011e-09
JMJD6	577.407	1.24707	0.128645	7.77443e-09
FBXO34	1308.08	1.10931	0.102403	8.18305e-09
TTR	6863.46	-0.98204	0.0777441	8.61979e-09
VDAC2	1224.95	1.02997	0.0872671	9.07422e-09
FOXQ1	408.4	-1.28404	0.137183	9.53479e-09
DGAT2	3341.46	-0.913501	0.0644969	9.99817e-09
ORC1	306.297	1.2605	0.132741	1.09329e-08
HKDC1	635.448	1.11326	0.103854	1.14068e-08
DNPH1	364.207	-1.21213	0.12359	1.19117e-08
OLR1	418.911	-1.17372	0.116126	1.2427e-08
UGP2	3591.84	0.974818	0.0771564	1.40507e-08
IGDCC3	281.054	-1.34034	0.149564	1.46128e-08
KRT20	160.905	1.4799	0.177363	1.51866e-08
GPAT3	349.456	1.25857	0.133872	1.5804e-08
CITED2	907.341	1.0234	0.0871955	1.64301e-08
UHRF1	351.987	1.26907	0.13618	1.70695e-08
KIF22	1424.5	0.99949	0.082817	1.77731e-08
NFKB2	409.462	1.18481	0.120577	1.86009e-08
MVD	2111.48	1.03696	0.0911755	2.03649e-08
GOLGA3	2379.65	0.938192	0.0713443	2.12923e-08
F10	1050.43	-1.03353	0.0909878	2.23265e-08
CCL28	457.331	1.20256	0.125576	2.45127e-08
SDCBP	1021.23	1.07461	0.100035	2.68786e-08
KIAA0040	559.644	1.11237	0.108003	2.81742e-08
TCF19	501.576	1.1538	0.116519	2.94723e-08
FREM2	1163.37	-1.04486	0.0943473	3.34258e-08
CCNB1	1367.12	-1.00064	0.0857394	3.49498e-08
POLD3	1002.36	1.04798	0.0960602	3.8301e-08
AADAC	149.785	-1.54884	0.200417	4.18813e-08
TGFB1	227.467	1.35274	0.159716	4.37277e-08
SLC26A2	16157.5	0.960026	0.0784063	4.78671e-08
TMEM214	1581.6	0.973819	0.0813124	4.99402e-08
GSAP	542.806	-1.23484	0.135947	5.20237e-08
METAP1D	184.832	-1.38603	0.167703	5.41373e-08
POLR3D	880.375	1.03277	0.0937862	5.6261e-08
SLC43A1	995.706	-0.992683	0.0854157	5.83903e-08
ARFRP1	570.534	-1.13639	0.115612	6.05515e-08
MAT1A	477.646	-1.1096	0.110446	6.29351e-08
SLC26A6	3390.45	0.96413	0.0799509	6.54041e-08
MASTL	883.246	1.0178	0.0915272	7.05009e-08
SCEL	231.176	1.29454	0.15119	7.94724e-08
PFKL	2574.61	1.01448	0.0917085	8.2733e-08
SPRY4	401.652	1.1683	0.124655	8.60442e-08
LMO7	6408.99	0.895626	0.0664932	8.94701e-08
SLC5A6	1361.95	-0.967725	0.0820154	9.29714e-08
LIG1	1230.69	0.980415	0.0847674	9.64884e-08
AGMAT	729.949	-1.04387	0.0986086	1.03695e-07
NAB1	2777.55	0.933884	0.0753178	1.11493e-07
SMPD3	922.706	1.07793	0.10669	1.15815e-07
POFUT2	849.039	1.01652	0.0936477	1.20394e-07
MRPS6	853.938	1.10331	0.112568	1.25034e-07
TUBB2B	173.172	1.41449	0.180533	1.29891e-07
FGG	9080.12	-0.919828	0.0731522	1.40314e-07
PGGHG	925.736	-1.0818	0.108555	1.45562e-07
NFE2L2	1924.64	0.985198	0.0878251	1.51333e-07
IL18BP	804.904	1.01067	0.0934946	1.62941e-07
USP14	3335.31	0.91678	0.0731276	1.69225e-07
GRB7	1348.72	0.950783	0.0807656	1.75739e-07
FAM111B	902.708	1.18	0.131981	1.89501e-07
EFNB2	329.947	1.15506	0.12655	1.96765e-07
SCRN2	1552.94	-0.964593	0.0842775	2.04009e-07
SAMD4A	599.929	1.06938	0.107561	2.1125e-07
GINS2	732.228	1.01842	0.0964399	2.18794e-07
ERVMER34-1	470.73	-1.082	0.110987	2.26937e-07
RAD51AP1	853.524	0.984146	0.0891891	2.35151e-07
FAM160A1	835.955	1.09006	0.112977	2.43527e-07
RHOBTB1	217.086	-1.27876	0.155387	2.60482e-07
ZFP36	709.375	1.01602	0.0965567	2.6902e-07
RASSF7	998.396	1.08346	0.11172	2.77613e-07
INO80D	790.234	1.06157	0.107158	2.86805e-07
LGSN	1031.82	-0.985266	0.0903295	2.96715e-07
TFEC	3549.92	-0.965932	0.0861919	3.07161e-07
PATL1	2085.09	0.98479	0.0904773	3.17608e-07
E2F8	515.416	1.05778	0.107376	3.61368e-07
HIGD1A	1426.33	1.06216	0.108557	3.72824e-07
OSGIN1	372.366	1.2111	0.143079	3.9753e-07
DHCR7	8727.22	0.869833	0.0651544	4.10226e-07
FUOM	402.96	-1.23394	0.14855	4.23084e-07
RAB37	1058.33	-0.963279	0.0867222	4.36291e-07
NRBP1	3074.28	0.905136	0.073408	4.49494e-07
HSD3B1	354.101	-1.13515	0.126228	4.62826e-07
PPP1R12B	875.902	1.02048	0.100046	4.76466e-07
H2AJ	491.013	-1.1296	0.1253	4.90487e-07
TICRR	466.139	1.09908	0.118416	5.18941e-07
C1QTNF6	398.326	-1.1173	0.122752	5.33474e-07
ALDH1B1	434.992	-1.11533	0.122354	5.48084e-07
PPME1	1550.29	0.946047	0.0833116	5.62672e-07
ABCC4	787.76	-0.986591	0.0927994	5.92157e-07
APOA4	347.492	1.29689	0.165045	6.08089e-07
TNFRSF10B	2334.33	0.911709	0.0757895	6.24134e-07
MCM2	1188.89	0.982138	0.0922656	6.4063e-07
FOXA1	1974.54	-0.918589	0.077661	6.57773e-07
CALU	6582.08	0.944051	0.083759	6.93061e-07
SORD	758.413	-1.0046	0.0979124	7.10843e-07
DOP1B	703.006	1.01094	0.0996083	7.29369e-07
IL2RG	360.086	1.15451	0.133296	7.48154e-07
RARRES1	239.405	-1.25544	0.15692	7.66864e-07
CDCA4	248.245	1.28699	0.164378	7.85672e-07
NR2F2	1838.68	-0.95014	0.0855759	8.04724e-07
CDCP1	1374.23	0.93099	0.0812302	8.24398e-07
EPB41L5	1521.44	0.941231	0.0836571	8.44102e-07
CILK1	932.785	-0.978689	0.0927233	9.04907e-07
PITPNM2	385.155	1.09533	0.120392	9.47207e-07
ATF7IP2	255.862	-1.24662	0.156549	9.69674e-07
HELZ	2385.31	0.936373	0.0832342	1.03752e-06
ZNF292	1375.49	1.0158	0.102095	1.06033e-06
HYAL3	88.1795	1.61138	0.243924	1.08442e-06
EIF2AK3	772.451	0.99564	0.0976226	1.10854e-06
GNE	349.69	1.12651	0.129378	1.16001e-06
ANKZF1	1564.24	0.91421	0.0787198	1.18679e-06
LAMC2	4389.58	0.863089	0.0667238	1.29628e-06
TP53INP2	587.603	1.02001	0.104767	1.35614e-06
DKK1	1252.58	-1.00865	0.102306	1.4185e-06
SUCO	1655.96	0.919732	0.0809582	1.48261e-06
FADS6	480.78	1.0506	0.113454	1.65674e-06
STK24	2515.99	0.973552	0.0948404	1.6944e-06
KLF5	4212.38	0.870434	0.0698833	1.81065e-06
CHPF	1389.09	1.03258	0.109663	1.85053e-06
FSTL3	938.763	0.97975	0.0968284	1.89111e-06
MAP2K1	707.795	1.03157	0.10981	1.93349e-06
SLC23A1	1691.87	-0.949475	0.0898059	1.97735e-06
PLEKHA2	384.955	1.10308	0.127681	2.02124e-06
CHST3	2798.13	-0.860472	0.0679176	2.10887e-06
KIRREL1	1212.5	0.908245	0.0798661	2.15435e-06
GAN	247.376	1.22981	0.159558	2.24698e-06
PIM3	460.181	1.02923	0.110261	2.29599e-06
DNASE1	1457.15	-0.951698	0.0913659	2.34839e-06
DDC	1230.73	-0.932054	0.0868671	2.40514e-06
RRM1	2502.11	0.95078	0.0923355	2.53626e-06
SERPINA4	382.522	-1.09431	0.128882	2.60458e-06
CNNM4	2202.4	0.868707	0.0724692	2.83079e-06
MELK	693.173	0.978283	0.100474	2.91026e-06
TACC2	3636.46	0.833333	0.0635066	2.99075e-06
ACSL3	4680.32	0.860465	0.0706836	3.40889e-06
ADAT2	319.489	-1.08137	0.127388	3.49268e-06
FANCI	1175.45	0.902808	0.0817431	3.57935e-06
SPRED2	1174.92	0.892523	0.0792593	3.84404e-06
RBM47	3361.52	0.8453	0.0671691	4.02278e-06
NPEPPS	2586.42	0.923955	0.0878677	4.21287e-06
ARID3B	571.617	1.02098	0.113337	4.31389e-06
APOL2	501.19	1.09476	0.132992	4.52121e-06
WASF2	2515.68	0.879961	0.0770013	4.62838e-06
NDUFC2	834.197	-1.01526	0.112604	4.95718e-06
PRMT3	252.436	-1.17006	0.154039	5.19769e-06
UBAP1	1246.98	0.912248	0.0861677	5.31873e-06
DUSP6	249.715	1.13761	0.145964	5.56822e-06
GPD1	224.8	-1.23971	0.172986	5.69508e-06
FDFT1	3421.64	0.919715	0.0885229	5.82338e-06
DPY19L3	729.189	-0.979879	0.104493	6.07987e-06
RBM15	442.9	1.00759	0.112307	6.48357e-06
FAM53C	1058.49	0.899792	0.083838	6.62437e-06
RNF128	1603.63	-0.869947	0.0759393	6.76614e-06
BARD1	290.376	1.11969	0.1425	6.90762e-06
AK3	423.638	-1.03875	0.120952	7.04902e-06
ACTG1	18883	0.798827	0.057162	7.48548e-06
MECOM	764.372	-0.932845	0.0931748	7.9311e-06
HMGCS2	2357.47	-0.85564	0.0725722	8.08291e-06
WDR76	314.769	1.09237	0.136175	8.23657e-06
RASSF3	412.211	1.03037	0.119689	8.54778e-06
H1-2	208.681	-1.20417	0.166461	8.70409e-06
SLC1A4	602.442	1.00769	0.113787	9.02137e-06
SOCS3	196.495	1.21364	0.1693	9.18047e-06
CHMP4B	5115.41	0.880294	0.0797319	9.5049e-06
POLE	2116.83	0.876754	0.0789018	1.00045e-05
RPS6KA3	5157.83	-0.930042	0.093473	1.01757e-05
ATF4	7530.4	0.85481	0.073226	1.05222e-05
HHLA2	1487.89	0.946459	0.0983418	1.07036e-05
MELTF	728.889	1.00689	0.115058	1.10779e-05
CHI3L1	148.82	-1.30449	0.196265	1.12653e-05
ZWINT	1835.9	0.84793	0.0717534	1.1453e-05
PGM1	1059.52	0.902029	0.086582	1.16425e-05
C11orf71	269.148	-1.13441	0.150087	1.18322e-05
CDYL	670.349	0.955971	0.101485	1.22177e-05
PLEKHG4	1566.36	-1.0082	0.115792	1.24103e-05
KIF13B	1450.59	0.882518	0.0814564	1.2604e-05
ZNF703	441.448	1.02206	0.119795	1.28007e-05
TRMT61A	403.061	1.07501	0.134498	1.30012e-05
S100G	42.7576	1.95375	0.376098	1.32045e-05
NT5E	244.542	-1.15299	0.156172	1.36131e-05
MEF2D	709.928	0.929237	0.0946937	1.38177e-05
NCAPG2	1012.02	0.893702	0.0849296	1.4022e-05
MPZL3	1823.31	0.869797	0.0783543	1.42257e-05
APOH	8618.37	-0.862505	0.0763597	1.44292e-05
DNMT1	1802.08	0.855151	0.0745839	1.46428e-05
LZTS3	277.298	1.10777	0.144746	1.48658e-05
CLN8	581.953	0.958908	0.103696	1.53162e-05
PCLAF	169.113	1.21057	0.173589	1.59973e-05
ETFRF1	136.922	-1.28975	0.19573	1.64544e-05
BDH2	465.994	-1.04119	0.126949	1.66892e-05
PREP	1433.07	0.944527	0.100234	1.71668e-05
MT-ND2	42070.4	-0.850098	0.0740025	1.74105e-05
ZNF395	1224.51	0.892214	0.0857931	1.78979e-05
SESTD1	1054.03	0.889717	0.0851558	1.83878e-05
ETS2	778.888	0.950597	0.102246	1.86347e-05
PEA15	793.955	0.928809	0.0961922	1.9129e-05
UGT2B7	107.442	-1.36104	0.217303	1.93784e-05
SMAD7	284.525	1.10881	0.146683	1.96272e-05
A2M	1511.49	-0.879463	0.0825283	2.01281e-05
FRAS1	5177.13	-0.847078	0.0735041	2.03802e-05
ITGA6	1130.18	0.880629	0.0829396	2.06328e-05
PRNP	583.668	0.95237	0.103067	2.08847e-05
SLC38A3	751.133	-0.976282	0.109792	2.11364e-05
RWDD2B	220.535	-1.13132	0.153688	2.13975e-05
HPN	1842.51	0.929089	0.096998	2.16659e-05
DECR2	268.368	-1.11051	0.148283	2.19376e-05
DMKN	1022.56	-0.881134	0.0837051	2.24883e-05
ARF4	4185.93	0.874056	0.0817178	2.2765e-05
MVK	647.357	0.933531	0.0987647	2.36077e-05
FERMT2	455.376	0.98999	0.114879	2.38954e-05
C4orf3	1852.63	0.882644	0.0849066	2.48177e-05
KLHL13	878.693	-0.933894	0.0995296	2.51269e-05
SLC29A3	281.304	1.09039	0.144632	2.64007e-05
YPEL2	619.36	0.966415	0.109223	2.67229e-05
MCM4	2611.38	0.84151	0.073518	2.70479e-05
SFN	416.347	0.998012	0.118523	2.73783e-05
MCM5	845.44	0.908792	0.0939778	2.98789e-05
CD300LF	97.5693	1.36544	0.226513	3.02589e-05
LACTB2	678.436	-0.93758	0.102426	3.10205e-05
RFFL	467.194	0.988439	0.117206	3.14021e-05
IFRD1	853.592	0.90338	0.0925803	3.17875e-05
MED15	1114.43	0.879611	0.0856921	3.21732e-05
OGDHL	556.15	-0.965393	0.110792	3.25654e-05
NYNRIN	705.113	-0.947882	0.105851	3.29648e-05
GDPD2	169.189	1.23922	0.192297	3.46781e-05
HMGCR	6489.99	0.808304	0.0657007	3.55629e-05
EZR	8002.02	0.817511	0.0685465	3.60164e-05
RHOG	452.069	0.971222	0.114035	3.64786e-05
IL1R2	276.677	1.08708	0.148913	3.69688e-05
ACTL8	430.362	-0.973399	0.115569	3.79842e-05
CAD	1612.55	-0.92044	0.0998952	3.90062e-05
PIM2	172.618	1.17808	0.176642	3.95176e-05
RAB27A	327.445	-1.01824	0.129087	4.00301e-05
SULT1E1	280.341	-1.11766	0.159782	4.2773e-05
BSDC1	1201.47	0.876934	0.0876495	4.38806e-05
MT-CO3	59776.4	-0.812279	0.0684028	4.44527e-05
SUGCT	168.587	-1.16479	0.174782	4.56113e-05
MSMO1	3429.83	0.907388	0.0975029	4.7392e-05
CDK1	2324.22	0.8461	0.0791355	4.92367e-05
RUVBL1	442.498	-0.969992	0.117177	5.04987e-05
APAF1	743.506	0.985649	0.122036	5.11482e-05
NPNT	3761.65	0.832319	0.075502	5.18144e-05
RFX5	320.557	-1.00751	0.129035	5.3147e-05
OLFML3	326.206	-1.01797	0.132492	5.38286e-05
C2CD2L	374.514	1.00671	0.129472	5.66229e-05
ZRANB1	753.874	0.963725	0.116972	5.73789e-05
ADAM22	888.291	-0.889878	0.0942592	5.81423e-05
CDKN1A	592.891	0.940804	0.110558	5.9755e-05
CHD2	3570.45	0.81451	0.0713517	6.05656e-05
TARS1	2945.87	0.845623	0.0811055	6.13842e-05
SUN1	3735.12	0.812472	0.0709571	6.38763e-05
SEMA4B	373.858	0.980754	0.123615	6.47242e-05
BRPF3	2286.99	0.803314	0.0682038	6.5571e-05
STIL	641.207	0.903249	0.0995688	6.72794e-05
DDIT3	479.929	0.994228	0.128267	6.98708e-05
NDEL1	775.634	0.911701	0.102446	7.07433e-05
MSH6	1826.76	0.874737	0.0908734	7.16155e-05
H6PD	992.84	-0.910994	0.102284	7.24895e-05
HMBS	579.448	-0.937316	0.110581	7.33649e-05
SALL4	421.395	-0.988394	0.126925	7.42648e-05
TXNRD1	2368.89	0.856796	0.0858007	7.79321e-05
ZBED6CL	431.294	-0.949291	0.115059	7.88619e-05
TULP3	764.405	0.908139	0.102354	8.07633e-05
PLS3	3566.72	-0.790188	0.0652031	8.17548e-05
ABHD4	1371.54	0.827224	0.0772184	8.37839e-05
WHAMM	414.394	0.967056	0.121989	8.6871e-05
JMJD1C	4477.33	0.852271	0.0858004	9.01364e-05
NCAPH2	772.285	0.890864	0.0982228	9.12335e-05
PTBP1	4879.29	0.784102	0.0640775	9.45769e-05
DZIP3	620.847	-0.921851	0.108641	9.68557e-05
MT2A	109.94	1.42461	0.27165	0.000100335
LCN12	192.346	-1.17955	0.19247	0.000101512
GCFC2	234.714	-1.0971	0.166244	0.000103916
MINPP1	518.798	-0.956199	0.120516	0.000105123
KLB	1151.81	-0.892617	0.100695	0.000107668
UGT2A3	1771.67	-0.814731	0.0752403	0.000108991
LNPK	692.344	0.899171	0.103108	0.000111683
SPTLC3	2584.94	-0.806346	0.0729419	0.000115828
CDH24	173.967	1.10059	0.170202	0.000117252
COPA	5927.54	0.778842	0.06403	0.00011868
TYMS	616.246	0.960928	0.124225	0.000120112
DGAT1	2015.08	-0.82174	0.0782571	0.000121545
PPP1R3B	2111.11	0.820055	0.0777412	0.000122982
TMEM42	170.193	-1.0969	0.170471	0.000128956
CES2	786.066	-0.889223	0.101332	0.000130491
COL26A1	286.571	-1.00878	0.141278	0.000132037
BEX3	813.701	-0.875263	0.0973722	0.000136855
RIDA	304.27	-1.00007	0.139575	0.000140169
ANKRD11	4409.78	0.772608	0.0631258	0.00014185
SULT2A1	363.317	-0.959171	0.126043	0.000143549
KPNB1	11726.9	0.822245	0.0800501	0.000145273
GRTP1	196.547	-1.05836	0.159804	0.000148729
CCNE1	215.306	1.04244	0.154512	0.000150461
SLC39A7	4719.63	0.791845	0.0698827	0.000152191
SEC23A	3793.76	0.798674	0.0722737	0.000153938
MYADM	631.79	0.892296	0.103943	0.000155682
UBLCP1	264.818	-1.00146	0.141235	0.000161029
PIR	186.709	1.16002	0.195006	0.000162805
ICAM1	660.906	0.894704	0.105061	0.000164581
NRBP2	315.413	-0.996984	0.140027	0.000168174
MT-ND5	47020.8	-0.775853	0.0652135	0.000171903
WNT11	179.842	1.1232	0.184071	0.000175712
NES	605.597	0.90045	0.108017	0.000179559
DECR1	560.5	-0.893877	0.105918	0.000183424
CDKL5	1298.87	0.844976	0.0892543	0.000189263
ACP2	507.156	-0.920944	0.1156	0.000193218
TM4SF1	1555.96	0.882168	0.102428	0.000197232
IMPACT	273.89	-1.00706	0.145599	0.000199259
GFPT1	4864.66	0.825757	0.0830976	0.00020129
PRELID2	404.588	0.979833	0.136387	0.000205363
MFSD3	108.095	-1.21647	0.218294	0.000209445
PHYH	2288.72	-0.800699	0.0745863	0.000213528
BTG1	919.831	0.9162	0.114595	0.000215578
FIG4	172.507	-1.06664	0.16872	0.000241244
ID1	91.2099	1.2958	0.249546	0.000248078
PITHD1	584.893	0.927266	0.1204	0.000252715
DARS2	945.624	-0.843195	0.0911212	0.000259822
SQLE	3901.52	0.83386	0.0881123	0.000271867
NSD1	1442.48	-0.824287	0.0847597	0.000274312
HAPLN3	189.637	-1.05524	0.166813	0.000279246
MED8	690.639	0.885765	0.10673	0.000281719
PRADC1	306.485	0.980034	0.140278	0.00028668
ETNK1	1329.33	0.816661	0.0823233	0.00028917
ALDH18A1	7421.37	0.792982	0.0739283	0.000294141
CDA	67.1595	1.3564	0.274431	0.000296644
RIOK3	862.176	0.855899	0.0967521	0.000309367
ACTR6	308.048	-1.00581	0.150396	0.000311949
KIF16B	679.883	0.863379	0.0998897	0.000322532
SLC5A3	1648.99	0.867891	0.101572	0.000325202
BACH1	1770.87	0.822782	0.0854327	0.000327883
BCL3	262.911	1.01112	0.154071	0.000344344
PKDCC	3806.28	-0.790628	0.0744349	0.000349997
RASD1	115.777	-1.14763	0.203685	0.000352827
PDZD3	691.127	-0.88245	0.107741	0.000355663
AKAP1	5597.2	0.748343	0.0592479	0.000364217
SLC3A2	4666.44	0.755993	0.0620533	0.000367077
OSER1	1951.73	0.860533	0.0999965	0.000369934
TVP23B	386.295	0.93167	0.126301	0.000375764
YOD1	435.195	0.986852	0.14642	0.000378714
TMEM192	461.561	-0.916513	0.120885	0.00038755
SMAP1	280.357	1.03539	0.16454	0.000393517
MCM3	2721.21	0.814412	0.0839221	0.000396538
POLR1A	1123.39	-0.819115	0.0857961	0.000402637
NAGLU	368.31	-0.933216	0.127685	0.000405708
CENPJ	578.219	0.88054	0.108376	0.000408774
ERICH4	254.973	0.97588	0.143701	0.000418056
FGFR2	2909.52	-0.770518	0.0685142	0.000427615
MCCC1	570.422	-0.875897	0.107572	0.000434135
CPNE2	756.811	0.858747	0.101528	0.000440779
RPS6KA1	1205.24	0.810437	0.0838785	0.000447532
MCM6	2307.96	0.785643	0.0747776	0.000450995
ARCN1	9429.03	0.762641	0.0662772	0.000457944
XRCC2	312.436	0.938015	0.131735	0.000461429
DPCD	135.282	1.17197	0.219383	0.00046846
CYP27A1	1620.49	0.798201	0.0798235	0.000475536
MOB3A	322.959	0.92734	0.128174	0.000479088
NCKIPSD	689.855	0.891509	0.114833	0.000486203
TMEM86B	107.117	-1.19664	0.229778	0.000493478
CYTH1	1086.87	0.805218	0.0827682	0.000497115
FGA	3012.62	-0.822485	0.0897886	0.000519432
ABCC1	389.179	0.926526	0.129635	0.000534865
PEX1	493.883	-0.880986	0.112435	0.000542671
TMF1	1047.29	0.819671	0.0892441	0.000554371
MED23	1546.48	0.794819	0.079848	0.000558301
WIPF3	260.784	0.990259	0.154272	0.000562237
WIPF2	1899.02	0.817682	0.0887174	0.000566218
TBC1D16	1491.54	-0.799864	0.0820087	0.000570227
SPSB2	169.248	-1.07181	0.186003	0.000574268
LRCH1	787.974	0.851708	0.102004	0.000578333
CDC20	400.04	-0.918101	0.127499	0.000586476
TUBGCP3	914.318	0.817143	0.0890473	0.000594749
DIAPH3	451.855	0.904083	0.122543	0.000598922
ODC1	2295.91	-0.787529	0.0777952	0.000603091
LASP1	8057	0.746582	0.0621301	0.000607286
CDC42EP4	1544.11	0.788436	0.0783191	0.000619896
WDR54	133.502	1.07775	0.189796	0.000624126
NSDHL	909.241	0.872408	0.110966	0.000641221
BRD4	1463.88	0.788131	0.0784746	0.000645513
CEBPA	910.993	-0.873575	0.111741	0.000649885
DCLRE1B	183.316	1.02386	0.169979	0.000662969
OSBPL2	3208.7	0.780676	0.0758186	0.000667327
CREBRF	1209.7	0.802034	0.0841135	0.00067603
RBMS2	822.112	0.83584	0.0972285	0.000680377
SNX9	1715.48	0.802405	0.08431	0.000684733
ATIC	1948.72	-0.808906	0.0870157	0.000697869
COL4A5	609.017	-0.842483	0.100341	0.000711187
LPIN2	2048.22	0.77727	0.0751656	0.000720309
SEC61G	641.138	0.869793	0.111396	0.000724915
SDCBP2	436.486	0.920869	0.131427	0.000729528
RGL1	1337.67	-0.806196	0.0865673	0.000734136
ZNF550	562.967	0.8855	0.117725	0.000743388
FANCA	801.985	0.851996	0.104913	0.000757487
HIC2	2473.82	0.753813	0.0663804	0.000762223
STEAP3	239.132	-1.00085	0.163928	0.000781338
IQGAP2	1778.23	-0.769025	0.072933	0.000786348
OAF	1535.59	-0.797049	0.0840839	0.000791371
NFIL3	592.676	0.908881	0.12845	0.000801401
MICAL3	1087.42	0.814701	0.0911291	0.00081141
TENT4A	687.112	0.843648	0.102817	0.000821493
SCRN3	356.894	-0.89706	0.124167	0.000836748
ORC6	410.305	0.892462	0.122465	0.00084186
SHCBP1	275.595	0.93682	0.1407	0.000852268
MCMBP	1699.7	0.77446	0.0760028	0.000862949
ABCC6	704.076	-0.90726	0.129345	0.00086834
FAM89A	134.066	-1.05859	0.190134	0.000879109
PCK2	1020.99	-0.812446	0.0913936	0.000884515
EZH2	818.947	0.840684	0.102791	0.000889934
ANKRD9	507.621	0.851434	0.10719	0.000900786
JAG1	2143.66	0.756284	0.069071	0.000911809
TUBB2A	165.881	1.01394	0.173197	0.00091737
CCDC90B	885.341	-0.8241	0.0965912	0.000928494
SLC12A2	844.246	-0.864016	0.112746	0.000934053
FLVCR1	1960.98	0.777879	0.0779936	0.000945191
NTN4	710.277	-0.823251	0.0963409	0.000950748
FKBP14	378.468	0.884034	0.121755	0.000990138
INSR	2031.48	0.766442	0.0738912	0.000995929
ERCC2	489.846	-0.858013	0.111539	0.00101361
HMMR	525.507	-0.868491	0.115857	0.00101952
UBE2T	525.857	0.871679	0.117692	0.00102564
PLEKHM3	847.501	0.808393	0.0917567	0.00103176
SCD	49516.9	0.767764	0.0751428	0.00103792
TGFBR1	611.198	0.846054	0.107661	0.00105659
STK31	526.055	-0.863761	0.115725	0.00107628
RFWD3	1796.97	0.757059	0.0715392	0.00108946
C5	502.498	-0.896306	0.129487	0.00109609
GPC5	192.033	-0.996183	0.171491	0.00110284
SENP5	870.252	0.808802	0.0933646	0.00110958
IL1R1	497.334	-0.858998	0.114419	0.00112314
MCU	1270.18	0.787692	0.084691	0.00112993
MEX3D	278.079	0.966803	0.16053	0.00115797
CAMSAP3	999.268	0.817279	0.0978204	0.00117218
ZNF512	498.671	-0.86781	0.119616	0.00120133
H2BC21	163.855	-0.991402	0.172379	0.00122343
PGM3	2666.14	0.753052	0.0713445	0.00123087
MGAT4A	2786.87	0.77491	0.0807581	0.00126067
RILP	265.642	0.917144	0.141231	0.00126814
CXADR	1645.39	0.783897	0.0846087	0.00127561
RAPGEF2	2441.77	0.771638	0.0794095	0.00128307
CYP51A1	163.688	1.02564	0.187771	0.00129805
FANCG	402.558	0.856319	0.116192	0.0013518
WDR81	458.024	-0.85674	0.116402	0.0013595
PAIP2	652.548	0.837896	0.108709	0.00137513
REXO1	428.198	0.869527	0.122498	0.00138307
MSMB	110.133	1.14443	0.241254	0.0013911
ACAD10	739.426	-0.805192	0.0953765	0.00143191
MAST2	2042.19	0.777852	0.0835751	0.00144012
MCM7	2887.08	0.75863	0.0752797	0.00145655
BCAT1	893.017	-0.876471	0.126457	0.00147298
ZNF581	718.694	0.805244	0.0958066	0.00150606
MIDN	1014.55	0.780177	0.0850526	0.0015395
COPG1	3990.57	0.737403	0.0665549	0.00156481
LHPP	368.584	-0.871042	0.124974	0.00159009
CCDC28A	217.093	0.995825	0.179562	0.00159853
MPP6	526.158	-0.831644	0.10782	0.00160696
TMEM94	2669.15	0.790602	0.0900335	0.00161547
UGDH	3049.71	0.778364	0.0848554	0.0016241
FAM210A	481.731	0.845694	0.114413	0.00163272
CPNE8	293.71	0.890954	0.134431	0.00165001
H1-0	5426.98	-0.732809	0.0650487	0.00165874
EPC1	915.038	0.799278	0.0943461	0.00166749
RLF	638.9	0.846917	0.115369	0.00167625
KMT2C	3399.75	0.74441	0.0702522	0.00168503
LBH	916.731	0.803607	0.0968039	0.0017207
CENPM	246.016	0.938838	0.156747	0.00174769
PWWP2A	780.977	0.803336	0.0969824	0.00177483
CA12	770.858	0.789308	0.0907751	0.00178393
NOCT	168.154	0.991015	0.180708	0.00179313
HSD17B8	205.559	-0.94839	0.162093	0.00181175
ANG	463.781	0.869996	0.12727	0.00182111
PLBD1	160.994	-1.00279	0.186763	0.00183052
SPATA20	4035.36	-0.769057	0.0823758	0.00184942
ZRANB2	774.662	-0.817699	0.104168	0.00185887
THNSL1	312.939	-0.883841	0.134004	0.00186841
BCL2L1	3606.24	0.736642	0.0681109	0.00189707
ELF1	3475.71	0.766691	0.0819396	0.00192604
DERA	2851.58	0.749937	0.0746079	0.00197555
TJP1	3441.58	0.728475	0.0649269	0.00198548
ALKBH5	1503.7	0.771376	0.0843751	0.00200533
SLC7A6	840.734	0.788479	0.0924327	0.00203553
OBI1	411.562	0.863779	0.126713	0.00204565
ACOT9	611.887	0.841952	0.116865	0.0020558
TUFT1	1004.3	0.790874	0.0937104	0.00207611
ZBTB34	974.756	0.796048	0.0961452	0.00209647
ERF	1103.09	0.7667	0.0827784	0.00210664
ARFGAP3	1153.65	0.77634	0.0873144	0.0021169
RFC5	677.799	0.80575	0.100751	0.00212716
ZNF764	163.458	-0.970271	0.176367	0.00214787
ATP8A1	1706.05	-0.769859	0.084857	0.00215846
ARAP3	252.528	-0.889487	0.140095	0.00219045
SLC25A24	944.089	0.807223	0.102281	0.00220116
PPARG	765.831	0.814314	0.106782	0.00229066
CABLES1	719.46	0.825167	0.111835	0.00230202
CCDC68	251.489	0.916544	0.154435	0.00231338
ERCC8	207.459	-0.928476	0.160296	0.00234762
PRSS23	1834.88	0.750249	0.0771424	0.00235906
LNX2	1395.01	0.759042	0.0813609	0.0023935
RRS1	112.343	-1.06871	0.227181	0.00241689
SLC26A3	1880.2	0.779767	0.091491	0.00242867
RNMT	1886.63	0.738456	0.0729453	0.00255063
ACBD3	959.843	0.799799	0.10268	0.0026263
TIGD1	121.153	-1.0405	0.217783	0.00263906
TXNIP	10735.1	0.745527	0.0770975	0.00271609
MALT1	645.802	0.801157	0.103882	0.0027291
ZBTB43	590.273	0.819274	0.112822	0.00275532
ARV1	166.354	-0.958114	0.17992	0.00276853
TRMT1L	372.657	-0.856988	0.131263	0.00279498
MSRB1	346.082	-0.856169	0.132123	0.00287714
GEM	138.283	0.987863	0.196388	0.00289101
ARID5B	2864.61	-0.725517	0.0685396	0.00290489
SEPHS2	3577.96	-0.731804	0.0716696	0.00293267
PLD1	798.554	-0.786408	0.0984743	0.00294669
MFSD1	269.845	-0.896786	0.152644	0.00296079
BTN2A1	572.096	0.796755	0.104048	0.00303226
EPS8	2720.87	0.723686	0.0682153	0.0030466
HMGB2	2428.26	0.791833	0.102138	0.00309021
RBP2	654.387	-0.848892	0.130775	0.00311966
PCSK9	2402.66	0.765039	0.0892536	0.00313451
MISP	763.474	0.785795	0.0997492	0.00319401
CHMP4C	364.923	0.870705	0.141935	0.00320892
C1RL	796.368	-0.776137	0.0951414	0.00322397
FIGNL1	494.033	0.81447	0.114295	0.00323906
SLC25A4	628.286	0.781973	0.0983817	0.00325435
CACNA1D	1166.23	-0.75841	0.0866708	0.00326967
CCNJL	794.514	0.766056	0.0905134	0.00328499
CCDC25	484.384	-0.813418	0.114428	0.00336194
IRF7	203.75	0.954146	0.185141	0.00340815
TKFC	490.738	-0.849725	0.132961	0.00343903
OAS1	299.551	0.87616	0.146376	0.00347002
PPM1D	386.942	0.821629	0.118984	0.00348552
TSPYL4	384.331	-0.835522	0.126044	0.00350106
C11orf86	55.2007	1.18218	0.300922	0.0035167
OVOL1	664.714	0.783484	0.100441	0.00361132
KIAA1522	3113.2	0.710711	0.0638425	0.00369078
LATS1	953.654	0.772431	0.0953659	0.0037552
IER5	419.639	0.835305	0.127378	0.0037713
DCDC2	703.38	-0.776045	0.0972323	0.00378739
NSMCE4A	1328.31	0.746464	0.0822207	0.00380349
PLPP6	149.906	-0.946822	0.184267	0.00383565
DNAJB4	140.202	0.946406	0.184469	0.00385189
DHRS1	318.817	-0.844183	0.132396	0.00386817
CAVIN1	2315.24	0.723263	0.0706536	0.00388446
CENPX	369.734	0.830641	0.125551	0.00390074
SLC38A7	373.557	-0.827577	0.123994	0.00391701
GNAI3	926.994	0.752085	0.0856727	0.00399914
VPS50	536.76	-0.836966	0.129423	0.00403216
ASPHD1	128.125	-0.961788	0.194431	0.00408237
MT-ATP6	40054.7	-0.707245	0.0631957	0.00411629
RAB3D	556.501	-0.788869	0.105452	0.00415024
SH3RF1	806.294	0.769961	0.0959935	0.00421845
POLR1B	623.654	-0.78007	0.1013	0.00423564
GAMT	378.312	-0.832855	0.128917	0.0043218
PDZK1IP1	62.6092	-1.12292	0.279996	0.00433906
ERG28	1504.21	0.771338	0.0975339	0.00444399
BST2	711.768	-0.773355	0.0987183	0.00446168
SUSD4	231.188	-0.888772	0.159272	0.00447939
ETHE1	1053.81	0.767254	0.0956437	0.00451486
H2BC5	274.819	-0.853018	0.140734	0.00453263
ZNF239	125.04	-0.986659	0.211012	0.00458586
HBP1	1233.77	0.773638	0.0992042	0.00460366
WIPI1	504.56	0.797445	0.111946	0.00462161
COBL	2002.43	0.724611	0.073615	0.00465753
MBTPS2	683.366	-0.791617	0.109188	0.00471172
KCNK6	333.409	0.822157	0.125372	0.00472981
KANK2	356.503	0.825932	0.127778	0.00476652
TMEM189	711.637	0.770187	0.098291	0.00478491
CASP8	752.832	-0.75758	0.0916224	0.00480329
TYSND1	486.953	-0.809512	0.119259	0.00484008
MOCS1	480.319	-0.801946	0.115424	0.00485858
TMCO6	243.849	-0.871324	0.152523	0.00487718
BAG3	730.076	0.759345	0.0929836	0.00495152
MND1	126.044	1.02758	0.23608	0.00497011
KREMEN1	1708.46	0.724629	0.0746457	0.00498887

## Sheet: HT-29, CoCl2
Gene	baseMean	log2FoldChange	lfcSE	svalue
AASDHPPT	531.712	-1.47511	0.101484	0
ABCC3	5922.04	-1.57184	0.0514213	0
ABCC4	1066.02	-1.80975	0.0760253	0
ABHD4	1570.39	4.34379	0.0869846	0
ACP6	775.656	-1.27991	0.0827277	0
ACSS2	2301.63	3.3091	0.0645667	0
ADAMTS6	561.526	-2.86716	0.112372	0
ADCY3	350.54	-1.7085	0.123234	0
ADGRG6	1355.81	-2.25196	0.084737	0
ADM	1424.96	5.40216	0.112207	0
ADM2	449.308	-1.52381	0.10498	0
AGBL5	637.338	-1.34839	0.0913357	0
AGL	823.512	-1.49877	0.0809659	0
AGMAT	235.408	-3.13725	0.173829	0
AJUBA	1579.08	-2.61857	0.0798484	0
AKR1B10	2711.46	3.47196	0.0743837	0
AKR1C1	1731.85	5.2768	0.101906	0
AKR7A3	438.23	-1.52016	0.10534	0
ALDH3B1	689.796	-1.77954	0.0903978	0
ALDOC	2111.01	3.19032	0.0667248	0
AMOTL2	790.308	-2.06341	0.0909398	0
ANKS6	504.973	-1.68153	0.106402	0
ANXA13	5578.76	-3.85202	0.062484	0
ANXA4	6331.38	-1.16194	0.0463319	0
ANXA9	441.515	-1.7688	0.117308	0
AOC1	338.466	-1.72844	0.122744	0
APOL1	3085.69	4.03943	0.0745613	0
APOL2	2307.48	4.46806	0.0772776	0
AQP3	604.304	-1.76223	0.0985077	0
AQP5	292.055	-3.71557	0.178326	0
AREG	3154.87	-3.1104	0.163213	0
ARFRP1	386.206	-1.82836	0.115241	0
ARHGAP11A	1318.19	-1.9101	0.0802146	0
ARHGAP23	3394.72	-1.49123	0.0626981	0
ARHGEF17	586.608	-1.87504	0.105489	0
ARID5B	658.552	-1.5372	0.0953618	0
ARPIN	506.287	-3.01062	0.119595	0
ARSD	601.026	-1.75319	0.0940896	0
ARV1	138.528	-2.87028	0.215124	0
ASPM	2325.17	-1.39559	0.0670811	0
ATIC	1432.73	-1.2854	0.064563	0
ATP2C2	1071.89	-2.22544	0.0837502	0
AUNIP	211.698	-1.94465	0.156199	0
AURKA	1512.4	-1.5141	0.0677573	0
B3GALT6	211.439	-2.50445	0.165649	0
BCAS1	1425.87	-1.56922	0.0730194	0
BHLHE40	2631.7	4.58755	0.0721005	0
BLM	511.444	-1.7944	0.103992	0
BORA	439.027	-2.22491	0.118359	0
BRCA1	1254.45	-2.01006	0.0780929	0
BRI3BP	539.316	-1.48474	0.107731	0
BTG2	593.67	-1.50549	0.0928397	0
BTNL9	738.681	-1.66961	0.096797	0
C12orf49	4415.48	2.79037	0.0517015	0
C17orf75	385.031	-1.57183	0.112354	0
C19orf54	281.964	-1.92595	0.139427	0
C1RL	349.74	-2.91881	0.141685	0
C9orf152	529.931	-1.58666	0.0990907	0
C9orf64	248.284	-2.0138	0.145348	0
CABLES1	461.552	-1.89072	0.110814	0
CAD	613.29	-2.60889	0.105264	0
CALM2	6255.77	-1.028	0.0488783	0
CARD9	467.556	-3.62824	0.139591	0
CCDC112	241.56	-1.79735	0.143885	0
CCDC198	408.158	-1.8614	0.119739	0
CCDC71	111.799	-2.4346	0.221282	0
CCDC88C	672.045	-1.51226	0.0928627	0
CCDC9B	409.53	-2.13186	0.124589	0
CCNA2	948.249	-1.65439	0.0788056	0
CCNB1	2128.37	-1.53197	0.0672175	0
CCNB2	1542.46	-1.78881	0.0681503	0
CCND1	719.116	-2.52785	0.0978674	0
CCNF	313.239	-2.09339	0.143416	0
CD24	3574.9	-1.21647	0.04991	0
CDC20	973.364	-1.42442	0.0864714	0
CDC25B	1220.03	-2.41605	0.0798035	0
CDC25C	332.16	-2.26396	0.132654	0
CDC42EP1	815.629	-2.78488	0.0964854	0
CDCA7	1374.87	-2.39678	0.0778054	0
CDK2	559.623	-1.49467	0.095605	0
CENPA	184.432	-2.41444	0.174853	0
CENPB	756.953	-1.49504	0.0868229	0
CENPE	1356.39	-2.06881	0.0731137	0
CENPF	4969.97	-1.47082	0.0615781	0
CENPI	334.331	-1.81772	0.127564	0
CENPK	578.463	-1.59805	0.0960808	0
CEP55	1069.53	-1.62975	0.077332	0
CFTR	3468.34	-4.05908	0.065805	0
CHAC1	884.162	-1.78458	0.0841407	0
CHAMP1	489.401	-1.67144	0.101906	0
CIP2A	740.609	-2.0632	0.0877934	0
CISD3	581.613	-1.99019	0.0988038	0
CLDN1	1162.61	-2.50719	0.0887265	0
CLEC3A	862.432	-3.77527	0.113311	0
CLK3	4336.23	3.00818	0.0578598	0
CNTRL	571.273	-2.5463	0.104291	0
COLCA2	364.034	-3.8285	0.16469	0
COQ2	291.938	-1.68633	0.12749	0
CORO2A	1230.71	-1.26519	0.0684788	0
CREB3L1	1634.85	-1.55084	0.0799405	0
CREB3L4	219.013	-1.94914	0.15336	0
CTDSPL	1167.94	-1.48176	0.0733383	0
CTSD	6697.55	2.7563	0.0536705	0
DARS2	432.075	-1.93653	0.110926	0
DBN1	1180.32	-1.53524	0.0879801	0
DBNL	1150.77	-1.32225	0.0710298	0
DCPS	432.727	-1.54268	0.105208	0
DDC	207.74	-1.89717	0.153032	0
DEDD2	2943.49	3.11517	0.0612328	0
DENND2D	912.011	-1.66039	0.0787715	0
DEPDC1	594.425	-2.72465	0.106859	0
DEPTOR	513.799	-2.74294	0.114104	0
DHFR	529.435	-2.32869	0.107142	0
DHRS11	501.698	-1.75007	0.106414	0
DIS3L	258.777	-2.49751	0.152915	0
DKC1	2642.9	-1.24079	0.0637697	0
DLG3	2347.39	-1.40253	0.0583994	0
DLGAP5	616.684	-2.12167	0.0978487	0
DNAJC22	348.543	-2.80669	0.140307	0
DSCC1	522.175	-1.69515	0.102158	0
DTX4	1219.71	-1.29013	0.0726256	0
DUSP6	1181.86	-2.56589	0.0852843	0
DUT	409.763	-1.51832	0.109064	0
DYNC1H1	15632.3	2.18706	0.0391419	0
DZIP3	334.291	-2.04439	0.126637	0
E2F8	267.592	-2.54435	0.152184	0
ECT2	3147.82	-1.22386	0.0530381	0
EDN1	225.583	-3.34968	0.186694	0
EGFR	1481.48	-1.72614	0.0682245	0
EGLN3	2285.1	3.97493	0.0713137	0
EGR1	1284.84	-3.7084	0.111238	0
ENC1	4437.01	-2.41445	0.0524882	0
ENDOD1	930.425	-1.58098	0.0810021	0
ENO1	59778.9	2.44496	0.0390458	0
ENO2	5251.11	4.85819	0.0620513	0
EPHB4	2460.66	-2.30871	0.0627542	0
ERBB2	1858.94	-1.21557	0.0692968	0
EREG	2337.64	-3.85965	0.162423	0
ERO1A	5562.85	3.25428	0.0596414	0
EXOSC2	316.756	-2.44689	0.136904	0
EXTL2	299.341	-1.74472	0.13545	0
F2R	955.206	-4.212	0.117641	0
F5	2623.87	-1.36647	0.0660514	0
FAM111B	565.338	-1.62397	0.0998168	0
FAM136A	1065.15	-1.27678	0.0736036	0
FAM149A	414.977	-1.60625	0.114728	0
FAM162A	5363.29	3.53419	0.0562135	0
FAM210B	266.338	-2.19275	0.140996	0
FAM219A	1919.47	5.08349	0.0922859	0
FAM83D	526.503	-1.58127	0.100875	0
FANCF	287.682	-2.17177	0.138809	0
FANCI	3153.86	-1.06729	0.0574225	0
FBXO30	1910.7	3.70255	0.0753361	0
FERMT1	2115.54	-1.88589	0.0595779	0
FFAR4	432.03	-1.65106	0.110619	0
FGF19	534.138	-1.7297	0.109186	0
FGFR2	507.74	-1.79132	0.110233	0
FGFR3	695.398	-1.4012	0.0890126	0
FKTN	603.758	-1.42572	0.0951685	0
FLRT3	246.525	-2.29178	0.151208	0
FOXA1	1117.16	-1.51489	0.0822754	0
FOXA3	213.555	-2.54077	0.166919	0
FOXM1	996.848	-1.42177	0.0905068	0
FOXQ1	750.138	-2.1992	0.107749	0
FRAS1	2486.53	-1.85906	0.0557014	0
FTL	145680	3.80487	0.041513	0
FUT1	305.33	-2.37525	0.141213	0
FUT11	1786.58	3.67221	0.0735534	0
FUT2	158.989	-2.15916	0.179266	0
FUT4	934.696	-1.91876	0.0821829	0
G0S2	287.01	-1.97429	0.135091	0
GABARAPL1	4695.02	4.70797	0.0639282	0
GABRP	447.152	-2.83487	0.127078	0
GALNT12	636.318	-1.42845	0.0910112	0
GALNT7	939.899	-1.36807	0.0802187	0
GAPDH	87793.6	2.58432	0.0374358	0
GART	1657.17	-1.25958	0.0636737	0
GASK1B	511.927	-1.83564	0.109805	0
GATA2	517.504	-2.40609	0.112517	0
GATD1	1297.52	-1.17661	0.0670323	0
GCLC	6267.66	3.4561	0.0503998	0
GCLM	4247.16	4.05698	0.0614985	0
GDA	1209.62	-2.02747	0.0780257	0
GEN1	651.872	-1.93079	0.0991233	0
GJB2	520.85	-1.60646	0.100455	0
GJC2	279.346	-2.89325	0.159446	0
GLA	4167.53	4.20057	0.0601583	0
GNPNAT1	533.824	-1.61018	0.0986267	0
GPATCH4	473.551	-2.24879	0.113362	0
GPI	19676.2	2.90971	0.0445944	0
GPX3	3211.7	4.39797	0.0680041	0
GPX8	261.137	-2.36825	0.150205	0
GRAMD1B	4119.35	-1.08641	0.0506657	0
H1-0	5279.15	-2.16923	0.0708792	0
HBEGF	838.438	-1.84649	0.109433	0
HCAR1	1151.18	-3.59168	0.0919046	0
HEATR1	1036.15	-1.5784	0.0798393	0
HENMT1	247.722	-2.1052	0.145327	0
HES6	253.514	-2.1523	0.145205	0
HGH1	183.215	-2.37704	0.179596	0
HIBCH	367.905	-1.9975	0.120999	0
HK2	7133.88	4.50137	0.0535511	0
HMGB1	4162.12	-1.05198	0.0554776	0
HMGB3	701.174	-2.2114	0.0962707	0
HMGCS1	16124.3	4.19762	0.0514275	0
HMGCS2	141.112	-2.71268	0.208176	0
HMOX1	16880.4	8.74797	0.0956602	0
HNF4G	806.398	-1.42617	0.0879675	0
HOXB8	388.799	-2.2818	0.143453	0
HOXB9	4128.66	-1.13663	0.0509741	0
HOXC4	198.075	-3.0667	0.209412	0
HS3ST1	447.863	-2.0587	0.11249	0
HSPH1	11862.1	2.27259	0.0421884	0
ICMT	1123.84	-1.25189	0.0719479	0
ID1	632.725	-1.97954	0.100843	0
ID2	474.859	-1.69751	0.110908	0
IDI1	5493.85	3.16388	0.0637414	0
IFT46	320.574	-1.8598	0.128653	0
IFT81	320.378	-2.46278	0.14001	0
IGFBP6	2062.79	3.05955	0.0633588	0
IL20RB	236.285	-2.81464	0.176386	0
INSIG1	15109.4	4.63176	0.0655094	0
IQGAP2	1017.75	-1.89208	0.0778744	0
IRS1	884.43	-2.19076	0.0873915	0
ITGA1	1773.62	-1.18246	0.0609402	0
ITPR2	1216.75	-1.19619	0.0709545	0
IVD	1246.03	-1.9275	0.0747735	0
JADE1	475.665	-2.00268	0.111323	0
JDP2	401.202	-1.58869	0.10989	0
JRKL	559.598	-1.41116	0.0936661	0
KAT2A	611.293	-1.77101	0.0942775	0
KCNE3	506.801	-2.12495	0.105176	0
KDM3A	9777.3	3.52347	0.0465407	0
KIF12	330.179	-2.42487	0.134489	0
KIF15	485.299	-1.52782	0.103829	0
KIF18A	750.988	-1.32932	0.0857156	0
KIF1B	5680.1	2.56361	0.0497357	0
KIF20A	529.724	-1.54988	0.108153	0
KIF21B	696.391	-2.86366	0.105994	0
KIF23	1631.83	-1.49327	0.0685169	0
KITLG	980.732	-3.39066	0.0948062	0
KLHL21	2927.92	3.77035	0.0641483	0
KNSTRN	849.156	-2.42808	0.0899566	0
KRT80	1353.15	-1.62842	0.0904206	0
LAD1	1438.25	-1.65342	0.0692626	0
LDHA	61691.8	3.16577	0.0434209	0
LFNG	355.185	-2.23932	0.132467	0
LIMS2	546.23	-1.5801	0.0977995	0
LMNB1	1063.67	-1.78265	0.0890618	0
LMNB2	1632.33	-1.37301	0.0681861	0
LMO4	2225.15	-2.09634	0.0616291	0
LPIN1	2098.18	3.81184	0.0742737	0
LRATD2	7195	-1.1621	0.0461863	0
LRRC14	273.321	-1.71601	0.132428	0
LRRC31	232.682	-2.87716	0.170418	0
LRRC8D	702.844	-1.90694	0.0902039	0
LXN	135.102	-2.39554	0.201178	0
MAFG	5267.46	2.96198	0.0535756	0
MAOA	1154.2	-1.85986	0.0746521	0
MAP1A	3009.59	7.66579	0.146527	0
MAP3K5	525.719	-1.58789	0.0979086	0
MARCKSL1	4358.91	-1.13871	0.0568703	0
MARVELD1	325.451	-2.04753	0.126471	0
MAT2A	5261.6	-1.73035	0.0466551	0
ME1	5120.96	3.54891	0.0525885	0
MECOM	1099.67	-2.75624	0.0854691	0
MICAL2	2962.64	-2.06686	0.0571616	0
MIPEP	415.712	-1.54252	0.112368	0
MKNK2	10707.2	2.7279	0.0526123	0
MMRN2	240.621	-1.99773	0.15411	0
MOGAT3	179.788	-2.16333	0.169161	0
MORC4	612.56	-1.45446	0.101148	0
MRAP2	237.607	-2.04758	0.149841	0
MRM1	102.028	-3.33438	0.271774	0
MRNIP	3126.48	4.17179	0.0733762	0
MT2A	2735.21	4.49036	0.0812659	0
MTBP	598.612	-1.66907	0.0939611	0
MUC5AC	1239.69	-2.56014	0.096394	0
MYB	401.18	-3.25853	0.144005	0
MYBBP1A	349.22	-1.64264	0.121015	0
MYC	1661.29	-1.88203	0.0661711	0
MYO1C	3846.84	-1.37405	0.0532364	0
MYOM3	1202.55	-1.52388	0.0741705	0
NAA25	3830.78	2.93144	0.0586175	0
NCDN	420.19	-1.52045	0.1116	0
NDC80	1370.24	-1.731	0.0747842	0
NDRG1	67721.6	5.95868	0.0518508	0
NEK2	709.492	-1.4896	0.0889005	0
NEK9	726.176	-1.35189	0.087018	0
NEU3	551.754	-1.92535	0.099041	0
NFE2L3	1417.1	-1.35276	0.0693679	0
NFYB	420.304	-2.05885	0.113312	0
NHS	650.033	-1.90733	0.094387	0
NIPSNAP1	1480.27	-1.52059	0.0689489	0
NMUR2	1221.32	-1.66101	0.0791956	0
NNMT	339.649	-2.70063	0.156073	0
NOSTRIN	388.869	-1.87127	0.114418	0
NOX1	717.31	-5.32734	0.170982	0
NPLOC4	6923.45	2.36086	0.04696	0
NSD1	1942.98	-1.8127	0.0618051	0
NT5E	1422.18	-1.15539	0.0637686	0
ORC5	470.855	-1.46672	0.103614	0
OSBPL5	531.169	-1.64423	0.100157	0
OSER1	5094.38	2.72163	0.0538774	0
OSGIN1	2576.11	5.21247	0.0831894	0
OTULINL	507.489	-2.16405	0.108008	0
P3H4	200.811	-2.05944	0.163142	0
P4HA1	7584.36	3.41522	0.0484171	0
PCK2	1508.52	-2.78895	0.0819781	0
PDCD11	948.107	-1.88928	0.0793873	0
PDE3B	605.481	-1.75355	0.0964268	0
PDK1	3433.13	2.91026	0.0556179	0
PELO	2707.22	3.099	0.0584358	0
PFKFB3	8682.94	5.17253	0.0592183	0
PFKFB4	2118.74	5.46464	0.0977063	0
PFKP	5567.48	2.72398	0.0523889	0
PGK1	49356.1	2.86672	0.0368542	0
PHF1	2286.05	3.16291	0.0642309	0
PHF19	729.123	-1.64401	0.0880291	0
PHLDA1	1274.99	-1.94912	0.0818414	0
PHLDB1	1742.57	-1.47623	0.0706835	0
PHYKPL	746.683	-1.50056	0.0841331	0
PIGW	305.882	-2.08839	0.130667	0
PIK3C2B	859.942	-1.48032	0.0795626	0
PIK3R1	1609.98	-1.41977	0.0684058	0
PIMREG	274.831	-2.26801	0.141264	0
PKDCC	594.268	-2.14289	0.101961	0
PKM	57743.1	2.72167	0.0457865	0
PKN3	160.377	-2.12371	0.178898	0
PKP2	838.435	-1.65465	0.085074	0
PLA2R1	995.724	-1.75921	0.0858286	0
PLBD1	145.068	-2.32035	0.194582	0
PLCD3	1281.12	-1.49696	0.0730121	0
PLD1	1030.55	-1.38896	0.0757961	0
PLEKHA5	867.33	-1.314	0.078787	0
PLEKHG2	631.51	-3.20035	0.116499	0
PLEKHG4	633.592	-2.10286	0.100822	0
PLK1	715.78	-1.59494	0.0930848	0
PLK2	3875.2	-2.2366	0.0623694	0
PLOD2	5853.43	3.26324	0.0586989	0
PM20D2	626.983	-1.69101	0.0912528	0
PMS1	293.778	-1.84303	0.131694	0
POF1B	4162.69	-1.56299	0.0591962	0
POFUT1	1364.37	-1.88	0.0687585	0
POGLUT3	356.041	-1.60095	0.118396	0
POLR1B	529.628	-1.93903	0.100399	0
PPIL1	447.245	-1.72199	0.10912	0
PPP1R10	1390.23	-1.29106	0.0770239	0
PPP1R1B	255.975	-2.53031	0.155756	0
PROM1	2034.17	-1.08582	0.0581399	0
PRR11	1171.64	-1.32441	0.074229	0
PRTFDC1	307.095	-1.79103	0.127134	0
PSAP	29617.1	2.60093	0.0450386	0
PSIP1	1340.29	-1.55755	0.0835684	0
PSMB2	8526.62	2.77983	0.0467475	0
PSMB3	6556.29	2.46644	0.0493314	0
PSMB4	5652.87	2.49642	0.0474868	0
PSMC4	8547.85	3.19561	0.0446152	0
PSMD1	6846.84	2.50769	0.0486918	0
PSMD11	10094	2.78621	0.0446976	0
PSMD2	11148.4	2.68285	0.0446573	0
PSMD3	4707.91	2.68869	0.0521591	0
PSME4	7767.56	2.5669	0.0516247	0
PSPH	1162.13	-2.30529	0.0961295	0
PSRC1	362.712	-2.56408	0.131508	0
PTGS2	393.479	-2.31243	0.12189	0
PTPN13	574.702	-1.52224	0.0960774	0
PTPN18	624.352	-2.04787	0.09564	0
PYCR1	1145.57	-1.68129	0.0875613	0
RANBP1	2539.75	-1.07695	0.055375	0
RARRES1	112.421	-2.55844	0.23139	0
RASSF10	149.162	-2.38249	0.195744	0
RBBP9	303.609	-1.98508	0.131538	0
RBMS2	998.178	-1.42862	0.0780971	0
REG4	331.753	-1.93347	0.134291	0
RFXAP	127.611	-2.99378	0.230037	0
RGS16	248.829	-2.24808	0.164168	0
RGS2	784.857	-2.15211	0.0958053	0
RHOBTB3	802.533	-1.38374	0.0821417	0
RHOU	640.432	-2.28025	0.0991131	0
RIOX2	673.328	-1.59286	0.0900399	0
RIT1	2636.4	3.33973	0.0602111	0
RNF41	1559.51	-1.38937	0.0726002	0
ROCK2	4159.61	-1.07529	0.049387	0
ROR1	648.324	-2.99219	0.109812	0
RUVBL1	1297.38	-1.28866	0.0708	0
RWDD2B	182.076	-2.45308	0.176649	0
SAMD10	238.134	-1.991	0.159071	0
SAPCD2	573.084	-2.17562	0.113314	0
SBSPON	666.783	-2.51562	0.097772	0
SDCBP2	2036.83	5.06983	0.0945599	0
SEMA3C	1588.96	-2.13241	0.0722711	0
SEMA4G	598.759	-1.58012	0.100212	0
SEPHS1	973.484	-1.29158	0.0756558	0
SEPTIN8	694.896	-2.03881	0.0936482	0
SERPINB1	4056.81	-1.16676	0.057367	0
SGO2	414.888	-1.5094	0.111448	0
SHH	835.968	-1.9544	0.0941757	0
SHROOM3	1421.72	-1.19167	0.0681552	0
SIGMAR1	653.914	-2.5858	0.108778	0
SLC12A2	8415.47	-2.18407	0.04563	0
SLC12A9	667.767	-1.41108	0.0958689	0
SLC16A3	3239.62	2.97658	0.0613612	0
SLC1A4	928.768	-1.50969	0.0877059	0
SLC25A15	246.618	-1.86381	0.14068	0
SLC25A43	293.353	-1.92473	0.129928	0
SLC29A1	338.888	-1.76266	0.126786	0
SLC29A2	293.437	-2.00158	0.140624	0
SLC2A1	37880.9	3.16917	0.0481422	0
SLC39A10	441.182	-1.53563	0.107958	0
SLC43A1	1028.95	-2.58719	0.0870089	0
SLC44A2	1321.52	-1.45174	0.0743755	0
SLC44A3	450.148	-1.81562	0.107498	0
SLITRK6	1446.55	-2.63911	0.0779325	0
SMARCC2	1135.31	-1.37499	0.0804468	0
SMIM3	207.682	-1.92119	0.155379	0
SNTB1	3053.26	-1.26136	0.0590769	0
SPC24	209.454	-2.56933	0.179778	0
SPDL1	516.387	-1.83215	0.102032	0
SPRY2	482.926	-1.5445	0.104619	0
SQSTM1	44318.9	4.90365	0.0411359	0
STEAP2	436.352	-2.36139	0.117033	0
STMN1	2859.95	-1.54762	0.0586724	0
SYK	547.43	-1.72274	0.0979463	0
SYTL2	1250.76	-1.98917	0.0761923	0
TARBP1	817.069	-2.25363	0.0873159	0
TASOR	1058.1	-1.72048	0.0777125	0
TBC1D31	661.154	-2.15449	0.0983589	0
TCF12	2422.76	-1.17787	0.0576594	0
TEAD2	316.307	-1.78984	0.126889	0
TESC	787.995	-1.56161	0.0816458	0
TGFBR2	1884.45	-1.10372	0.0595079	0
TGIF2	255.154	-1.80277	0.140999	0
THRA	502.662	-1.62225	0.115055	0
TIGD2	302.29	-1.88562	0.132432	0
TKFC	557.292	-1.42517	0.0943559	0
TKT	17393	2.32015	0.0394484	0
TM4SF4	5729.83	-1.7509	0.051613	0
TMEM139	177.673	-2.58736	0.18606	0
TMEM168	679.864	-2.07322	0.0914437	0
TMEM177	126.306	-2.27312	0.202857	0
TMEM185B	658.2	-1.75707	0.0935625	0
TMPO	2831.69	-1.41201	0.0572566	0
TMTC4	368.715	-1.76199	0.116666	0
TNFSF15	1138.29	-1.23383	0.0719402	0
TNRC18	3115.54	-1.17384	0.0585346	0
TNS2	789.272	-2.75632	0.100266	0
TNS4	843.018	-3.66635	0.107646	0
TOP2A	8245.57	-1.48586	0.0525938	0
TOX3	570.75	-1.42182	0.093719	0
TPM1	1668.46	-1.10796	0.061099	0
TPX2	3489.54	-1.77713	0.0528827	0
TRIOBP	695.511	-2.2096	0.095047	0
TRMT6	412.188	-1.68743	0.113218	0
TRNP1	1568.94	-1.16288	0.0658711	0
TROAP	460.775	-1.88994	0.115448	0
TSEN15	614.791	-1.82664	0.0941761	0
TST	508.771	-1.62994	0.109314	0
TWNK	394.242	-1.61599	0.113839	0
UBC	53064.3	3.1146	0.0522085	0
UBE2E3	526.461	-1.47609	0.101403	0
UBR4	19471.2	2.37913	0.0404499	0
UBTF	861.201	-2.86444	0.0993636	0
UCP2	998.945	-2.05181	0.0787495	0
UFD1	7029.94	3.89454	0.0507281	0
ULBP1	300.836	-2.51688	0.142578	0
UNKL	1490.9	3.7938	0.0786834	0
URB2	298.638	-1.79084	0.139815	0
USP40	911.08	-1.48654	0.0800616	0
UTP20	596.235	-1.41153	0.0927679	0
VANGL1	573.583	-1.41971	0.0953136	0
VCP	19187.8	3.13919	0.0420769	0
VIL1	1920.54	-2.62671	0.0698908	0
VWA1	698.852	-1.65256	0.102118	0
WDR12	573.579	-1.43299	0.0953054	0
WDR3	759.27	-1.40152	0.0874219	0
WNK4	329.04	-2.94501	0.143903	0
WWC1	1295.35	-1.27331	0.0671673	0
XRCC2	397.227	-1.85087	0.119607	0
YAE1	159.212	-2.30719	0.187426	0
ZBED3	791.181	-1.86885	0.0917507	0
ZBED5	907.454	-1.30041	0.0807478	0
ZBED6CL	632.261	-1.49292	0.0914677	0
ZC3H7B	837.802	-1.80572	0.0848349	0
ZFAND2A	1454.62	3.73944	0.0802902	0
ZFYVE9	357.782	-1.69377	0.123261	0
ZNF239	185.279	-3.1826	0.195766	0
ZNF292	4097.25	3.06372	0.0549617	0
ZNF318	523.12	-1.86085	0.104524	0
ZNF512	266.878	-1.82011	0.145014	0
ZNF544	544.523	-1.70772	0.10283	0
ZNF711	269.01	-2.13093	0.141681	0
ZNF780B	578.023	-2.3981	0.108611	0
ZNF816	354.249	-1.93255	0.120443	0
ZNF888	1073.48	-1.87688	0.0769479	0
ZNRF3	991.943	-1.39443	0.0746525	0
NAMPT	4514.41	2.87249	0.061573	2.88513e-305
LGALS8	3970.92	2.53674	0.0534666	6.49495e-295
ATP6V0E1	2723.03	2.60349	0.055784	7.3242e-290
TNIP1	4915.34	2.27578	0.0467413	1.80804e-289
FAM102A	3438.69	2.64631	0.0570565	7.45588e-289
HBP1	3097.42	2.662	0.0578246	1.04257e-285
MT1E	3447.69	3.16658	0.0719782	8.0173e-285
PSMC2	5205.56	2.26255	0.0468423	5.4743e-284
EFNA1	2115.15	3.03558	0.0688201	6.99508e-281
PSMD14	6231.46	2.74717	0.0612063	1.57137e-276
HSPA1A	1853.87	3.322	0.0776245	1.80933e-275
NPC1	3478.58	2.81695	0.0636606	1.82631e-272
PLEKHB2	8353.58	2.14457	0.0448313	2.50201e-268
SLC6A6	3226.43	2.80091	0.0637253	6.67376e-268
SLC6A8	5166.04	2.38087	0.0516513	1.14124e-267
ZBTB43	1667.14	3.61473	0.0873392	8.80876e-267
NEU1	2620.29	2.53511	0.0562351	2.01124e-266
GSR	2605.56	2.54015	0.0563999	3.71538e-266
UBE2O	2129.45	2.79494	0.0643454	1.32509e-261
SPAG9	6144.94	2.39397	0.0527114	4.08386e-261
HSP90AB1	47167.2	2.013	0.0420313	3.45708e-256
PSMB7	5015.63	2.22023	0.0483905	1.67393e-253
GBE1	945.573	3.79863	0.0957813	5.64454e-250
HSPA8	58850.8	2.12744	0.0459935	1.50202e-249
BNIP3L	2303.01	3.27276	0.0802254	4.41628e-249
PSMD13	6772.19	2.25365	0.0498266	8.92785e-249
YPEL5	2589.44	2.6369	0.0615239	4.678e-247
FAM13A	2109.51	2.609	0.0619278	1.77097e-237
HILPDA	1263.67	3.23415	0.0811746	1.03083e-236
BLCAP	5771.54	2.15024	0.0482104	2.05011e-234
OSBPL2	4312.67	2.24851	0.0513383	1.83218e-233
DNTTIP2	3858.39	2.37185	0.0554347	3.9227e-231
KIAA1217	2609.71	2.44605	0.0578408	2.92673e-230
GPAT3	1406.39	3.23459	0.0823827	6.85497e-230
FEM1C	2963.04	2.75097	0.0675515	9.78875e-229
TBC1D17	2882.4	2.36638	0.0557472	3.12305e-227
QSOX1	5851.68	2.11458	0.0479889	4.28841e-226
KRT19	15646.7	2.33248	0.0548537	1.10633e-225
WFS1	1923.35	3.07385	0.0787036	1.15424e-222
HMGCR	6175.97	2.10449	0.0482028	2.82403e-221
WDR45B	5613.98	2.04841	0.0466037	1.28113e-219
RIMKLA	970.397	3.33576	0.0877709	9.84651e-219
SCD	44344.8	2.02922	0.0462073	1.30542e-217
LAMA3	2469.74	2.45743	0.0600017	6.92293e-217
CA9	2510.93	2.49615	0.0618045	4.01161e-213
DNAJC2	3500.51	2.28661	0.0551606	4.1587e-212
MVD	1605.56	2.7352	0.0699181	7.53318e-211
HSPA1B	1754.53	3.06208	0.0808126	1.66059e-209
BLOC1S2	1559.67	2.74793	0.0705692	3.35993e-209
RLF	2542.85	2.74962	0.0709166	8.43942e-208
DNAJA1	5909.02	2.11462	0.0501511	2.48373e-207
SLC20A1	1888.2	2.56334	0.0652133	2.42824e-205
NSFL1C	3089.12	2.40294	0.0600245	1.33088e-204
SEC24D	2327.74	2.39032	0.0600152	5.44911e-202
PTGR1	3430.49	2.34452	0.0586957	1.28907e-200
MUC13	11519	2.00463	0.0474245	5.68908e-200
DAP3	4877.27	1.97419	0.0465199	4.37584e-199
HLA-C	3375.2	2.35646	0.0593734	1.28045e-198
AKT1S1	4902.31	2.14386	0.0523879	1.03413e-197
SAMD4B	6317.5	1.98138	0.0469503	2.42651e-197
KDM2A	6601.43	1.96729	0.0465064	4.86669e-197
TPI1	18860	1.81695	0.0418988	3.13432e-193
G6PD	4614.77	2.28216	0.0581287	1.34237e-190
ECPAS	6088.57	2.03094	0.0496034	6.53094e-190
YWHAG	13209.6	1.87589	0.0444206	7.66535e-189
SELENOK	1035.04	3.07077	0.0857451	6.24488e-188
STX3	5187.35	1.93127	0.0464409	1.18741e-187
UGDH	2945.15	2.46338	0.0649089	3.60643e-187
GLRX	1095.1	3.01539	0.084077	9.74041e-187
ANKZF1	2298.11	2.37439	0.0619555	2.22817e-186
AIFM2	1679.19	2.42631	0.0638062	4.73159e-186
STARD4	2567.43	2.85276	0.0786177	8.31732e-186
MGST1	3308.48	2.05853	0.0511022	1.31418e-185
PSMA7	9304.34	2.09248	0.0522812	1.80763e-185
TBC1D15	2589.8	2.37609	0.0621991	3.29176e-185
CREBRF	2060.16	3.00811	0.0843772	1.75502e-184
ALS2	2203.43	2.40292	0.0635011	2.0218e-183
LMTK2	4204.27	2.06315	0.0516545	4.60997e-183
STYK1	1436.43	2.68644	0.0734999	9.94775e-183
KLHL24	2320.29	2.52605	0.0679023	1.6122e-182
RDH11	2995.44	2.12516	0.0539689	4.03147e-182
ITPKC	1634.42	2.47583	0.0663846	1.57089e-181
PSMC6	2644.29	2.47341	0.0664473	8.65541e-181
IL6R	973.46	3.30351	0.0957566	2.52362e-180
FOSL2	4597.8	2.01909	0.0505158	4.20809e-180
LDLR	5633.79	2.51942	0.0683159	1.76493e-179
FAM241B	675.573	3.63236	0.107643	3.35945e-179
FNIP1	1658.51	2.59892	0.0711883	6.14569e-179
UBQLN1	6784.58	1.96384	0.0490161	2.58015e-177
KCMF1	3685.42	2.06646	0.0528755	6.21851e-176
BCAP31	10119.8	1.82611	0.0444509	9.56873e-175
MAPRE3	836.453	3.26077	0.0959647	3.5772e-174
CREM	688.142	3.37066	0.100485	2.33707e-172
SLC5A3	1962.1	2.24425	0.059867	5.05879e-172
PSMD8	7691.95	1.81053	0.0442514	9.90724e-172
BLVRB	1429.02	2.53933	0.0705752	1.52319e-171
WBP2	2743.11	2.14381	0.0563459	2.62636e-171
GABRE	3787.4	1.94884	0.0493973	7.71357e-171
PSMB1	5228.27	2.00352	0.0514589	2.46455e-170
PSMD6	1924.22	2.38259	0.0652206	4.38334e-170
CLDN4	11331.4	2.21012	0.0590299	8.90984e-170
ATG4A	731.617	3.24755	0.0971908	1.97421e-168
TALDO1	9453.08	1.75362	0.0427337	8.9963e-168
PCYT1A	2811.72	2.09533	0.0553807	6.35709e-167
LIPG	2189.92	2.2522	0.0611611	1.40703e-166
UBXN4	7612.94	1.90894	0.0487483	1.32293e-165
SERPINB5	1729	2.5576	0.0727512	5.29383e-165
RBM15	1548.95	2.49558	0.0704718	9.59311e-165
JUN	6705.81	1.99338	0.0522885	5.16679e-163
PNPLA8	2810.72	2.23792	0.0614887	2.64805e-162
GPATCH2L	2309.08	2.18558	0.0595723	5.73343e-162
TMCC1	1803.01	2.26298	0.0625858	1.99986e-161
CRKL	7155.6	1.90051	0.0490887	3.96989e-161
ZSWIM6	1484.07	2.43238	0.0689549	6.38563e-161
TCP11L2	1071.68	2.84288	0.0846205	5.08124e-160
SERTAD2	2557.22	2.36273	0.066665	1.18309e-159
CRY2	1191.02	2.58257	0.0750804	4.61209e-159
CLTC	17597	1.86098	0.0481407	5.38866e-158
GBF1	3670.6	1.88069	0.0489918	2.83656e-157
SDCBP	10027.4	2.11844	0.058041	7.56498e-157
PLEKHM3	1308.83	2.52471	0.0734354	1.31238e-156
CTDP1	960.79	2.75863	0.0830643	3.61612e-154
ZFAND5	6557.29	1.92023	0.0511046	1.39738e-153
CASP4	4624.22	2.0828	0.0573495	2.74999e-153
TMEM41B	2493.19	2.46664	0.0721993	8.5115e-153
SCPEP1	533.183	3.7433	0.121547	5.216e-152
TTC1	2042.76	2.1769	0.0613348	1.46498e-151
ABL2	1465.74	2.35807	0.0687896	9.90875e-150
PSMD12	6327.19	1.92229	0.0519156	2.46738e-149
CSTB	3377.78	1.88158	0.0503805	5.15085e-149
MSANTD3	947.699	2.71303	0.0827114	8.40739e-149
MAP2K1	3006.56	2.07913	0.0580944	1.25353e-148
DDIT3	3732.66	2.38534	0.0701474	2.91071e-148
HSP90AA1	22977.4	1.59624	0.039452	1.01236e-147
SQLE	10553.1	2.16925	0.0619294	2.41714e-147
DENND4C	3752.13	1.88393	0.0508003	4.32811e-147
PHTF1	1039.31	2.61928	0.0802941	8.10026e-145
FASN	8368.16	2.0608	0.0582945	2.01714e-144
CXCL8	703.935	3.65777	0.121791	1.28332e-143
PSMC5	3847.13	2.09176	0.0598461	5.33429e-143
TXNRD1	42324.7	3.65108	0.121843	1.10016e-142
CTSL	486.943	3.80686	0.128159	2.15467e-142
RNF24	1107.85	2.46169	0.0748099	6.16992e-142
P4HA2	2064.55	2.37784	0.0717295	4.61333e-141
DIAPH1	8662.79	1.68085	0.0439249	1.71815e-140
SUPT6H	6420.57	1.74386	0.0465026	4.24897e-140
PGD	5833.43	1.7006	0.0448136	9.08647e-140
AHCYL1	6632.71	1.69349	0.0445338	1.43053e-139
KDM5C	7696.29	1.71718	0.0455811	3.35216e-139
KMT2C	6854.53	1.64965	0.042884	5.96596e-139
SLC12A7	6015.34	1.9165	0.0540083	1.95637e-137
PLCXD2	770.778	2.79201	0.0897984	1.44285e-136
USP5	2823.09	1.93387	0.0550055	6.22765e-136
POR	2181.83	2.04388	0.059583	1.82738e-135
CLK1	4516.2	1.77608	0.0486824	3.70993e-135
VEGFA	16284.9	1.84725	0.0516694	8.36756e-135
DNAJB4	972.701	2.83141	0.0922312	3.62958e-134
MORF4L2	8090.49	1.73558	0.0472421	6.48166e-134
ALKBH5	1807.85	2.10634	0.062628	1.98983e-133
ABHD3	1088.68	2.66882	0.0858376	3.94412e-133
ACSL1	2309.06	1.94094	0.0558996	7.06769e-133
IDE	3209.3	1.93503	0.0556789	1.10511e-132
PNRC1	1361.03	2.45367	0.0771696	1.96308e-132
PIR	691.322	3.15178	0.106114	3.59182e-132
SFN	1631.53	2.27115	0.069908	1.22352e-131
DHCR7	4347.3	1.84381	0.0522078	2.26824e-131
RB1CC1	3940.84	1.93393	0.0560341	4.89018e-131
RELT	515.51	3.52796	0.12245	1.17383e-130
EPB41	3482.98	1.82056	0.0516077	7.41734e-130
HELZ	5319.11	1.84869	0.0528008	1.50347e-129
MICALL2	2234.51	2.23132	0.068999	5.89547e-129
BAG3	1390.88	2.2253	0.0688431	1.56295e-128
LAMB3	7529.35	2.21619	0.0685483	3.57275e-128
FOSL1	959.158	2.7204	0.09017	3.41217e-127
TXN	10878.5	1.82166	0.052224	6.58762e-127
ELF3	4898.64	1.81752	0.0523935	1.32595e-125
SEM1	2764.43	2.10817	0.0648612	4.61398e-125
PPARD	1483.26	2.15947	0.0670809	9.01218e-125
DNAJB9	1296.91	2.65752	0.0883413	1.46908e-124
PRDX1	5965	1.78993	0.0514618	3.14267e-124
IGHMBP2	996.018	2.51567	0.0825069	5.46911e-124
PSMD4	3785	1.75229	0.0499798	1.20801e-123
NDUFA4L2	1075.24	2.60747	0.0867122	2.59213e-123
SLCO4A1	949.466	2.6597	0.0890139	4.6181e-123
RNMT	3673.64	1.91145	0.0570412	1.15917e-122
TXNL1	2646.24	1.95214	0.0588136	2.01771e-122
ARRDC3	2402.45	2.26619	0.0724734	4.6449e-122
ADPGK	2837.31	1.79799	0.0523094	7.83506e-122
ABTB2	1895.13	2.06097	0.0638461	2.44959e-121
SMCR8	1326.54	2.22153	0.0709987	1.03878e-120
VCPIP1	1634.48	2.13499	0.067713	3.21401e-119
PI4K2A	798.313	2.64629	0.0901229	7.99436e-119
FLCN	740.036	2.7448	0.094463	1.37308e-118
P4HB	13552.8	1.55747	0.0426767	4.67457e-118
HCFC1	5486.86	1.8741	0.0565818	8.30781e-118
GCNT2	607.035	2.94177	0.103573	1.52464e-117
MXD1	2638.16	1.96102	0.0605787	3.24865e-117
TUBA4A	2063.04	2.28662	0.0749706	5.81061e-117
UBR3	2389.32	1.9779	0.0614432	1.05719e-116
FAF2	4072.84	1.67227	0.0480211	1.9565e-116
TOM1	968.92	2.47526	0.0835825	3.58944e-116
RIOK3	3851.87	2.06348	0.0657954	4.63046e-115
ZNF165	629.479	3.07485	0.110967	1.3657e-114
CYP4F11	377.489	6.10938	0.246476	2.92796e-114
PSMA5	5041.59	1.92465	0.0598184	5.24934e-114
BICDL1	963.877	2.31735	0.0774136	8.6927e-114
NQO2	1435.31	2.11241	0.068316	1.40363e-113
BCL2L13	2393.57	1.83873	0.0560797	1.95675e-113
UBFD1	2748.32	1.83579	0.0562349	9.0492e-113
SPATS2	1896.86	1.90559	0.0594386	2.12693e-112
ALDOA	410.116	3.67285	0.139169	4.5263e-112
DNAJB6	2317.14	1.81023	0.0552408	7.36063e-112
PIM1	400.662	3.46203	0.129793	1.12053e-111
BIRC6	10918.7	1.6402	0.0476215	1.5764e-111
SEC24A	1994.42	2.03669	0.0655424	2.13819e-111
ASPH	11093.6	1.58075	0.0450076	3.10779e-111
CYB5R1	977.182	2.42907	0.083496	5.38537e-111
AKR1C3	2330.54	2.15688	0.0712198	8.54788e-111
SLC25A25	1665.75	2.19981	0.0733639	2.04154e-110
PSMC3	4055.44	1.66189	0.0489596	3.69797e-110
AP5Z1	1425.6	2.22447	0.0746004	6.21236e-110
LAMC2	1261.83	2.18213	0.0728077	1.23354e-109
RHBDD3	973.841	2.30297	0.0783227	1.86971e-109
ATP6V0B	2529.58	2.02829	0.0660381	5.46502e-109
MED15	4027.44	1.80051	0.0557518	2.24083e-108
MAP3K2	3775.68	1.81169	0.0565899	1.98593e-107
ZFP36	4556.16	1.8823	0.0599445	5.75495e-107
CWC25	1847.64	1.95092	0.0633562	2.81578e-106
RANBP10	1393.41	2.06737	0.0687651	5.17601e-106
POMP	6089.38	1.9454	0.0632128	1.02924e-105
KDM4B	1149.92	2.186	0.0744357	1.69894e-105
RTN3	9776.67	1.58732	0.0466434	2.71206e-105
CYTH1	1525.22	2.02835	0.067357	6.45736e-105
FLNA	12725.8	1.52474	0.0439445	1.59643e-104
ACADVL	6048.61	1.57152	0.0461341	2.56621e-104
SOD1	3231.45	1.81919	0.0577476	3.80932e-104
CLDND1	1341.62	2.07604	0.069876	6.38057e-104
LSS	2063.73	1.90687	0.0620067	1.0325e-103
UAP1L1	505.565	3.02778	0.114782	1.89197e-103
MLLT11	362.151	3.77482	0.149942	2.91569e-103
SERINC3	7981.04	1.5574	0.0457667	4.70242e-103
JMJD6	1141.24	2.53108	0.0915954	6.52211e-103
TAX1BP1	10428.2	1.75739	0.0552452	9.58903e-103
TSC1	1633.52	1.96352	0.0652863	5.03913e-102
USP14	7019.81	1.65747	0.0508208	8.83238e-102
CPEB4	1521.24	2.23884	0.0784676	1.54451e-101
LNPK	2299.94	2.06719	0.0705702	4.67398e-101
PSMB5	2545.85	1.73191	0.0552034	6.33324e-99
SC5D	3825.77	1.99581	0.067911	1.00578e-98
CHD2	9514.72	1.51206	0.044627	1.38349e-98
DCUN1D3	722.592	2.49462	0.0919394	1.78799e-98
ATP6V1A	3787.75	1.73558	0.055501	2.70701e-98
DUSP3	2307.46	1.79569	0.058479	4.34547e-98
NQO1	10228.3	1.58095	0.0481491	6.73113e-98
EGLN1	466.582	3.00688	0.117131	1.20326e-97
PTPN23	1179.94	2.18455	0.0774607	1.69461e-97
HTT	3646.26	1.63089	0.050671	2.28392e-97
LSMEM1	397.545	3.22964	0.128188	3.01059e-97
PGAM1	962.209	2.17514	0.0770939	3.81151e-97
VLDLR	918.389	2.22012	0.0794192	5.55403e-97
FAM210A	761.72	2.3975	0.0882702	1.47894e-96
DNAJB2	1578.99	1.9346	0.0658728	2.85368e-96
RRAGC	570.775	2.64357	0.100854	9.48329e-96
PSMA3	2107.25	1.78032	0.0585999	1.8126e-95
PRSS8	2451.69	1.75889	0.0578103	7.47502e-95
MAFF	1355.18	2.22542	0.0808258	1.44541e-94
ULK1	2482.39	1.77896	0.058931	2.87067e-94
WDR26	4304.24	1.67272	0.0537021	4.46237e-94
PSMB6	1882.72	1.99619	0.0697293	6.69961e-94
ADRM1	3739.45	1.71814	0.0560104	9.27974e-94
PITRM1	2613.2	1.67627	0.0540111	1.36657e-93
RELB	789.306	2.5161	0.0956425	1.94924e-93
TSPAN9	1121.64	2.23238	0.0818485	4.05477e-93
SAT1	4179.5	1.95338	0.0683465	2.65257e-92
RNASET2	1943.46	1.81624	0.0615637	5.38843e-92
GNPDA1	1908.21	1.82569	0.0621832	1.24218e-91
NARF	1087.29	2.09089	0.0757223	5.07157e-91
PSMA4	6362.97	1.60224	0.051172	8.09893e-91
LASP1	13586.7	1.46441	0.044275	1.22849e-90
PER1	815.277	2.19912	0.0813022	1.73304e-90
VAT1	2258.35	1.71985	0.0571691	2.2614e-90
DNAJC3	2673.84	1.68925	0.0556583	2.91714e-90
FDFT1	5364.46	1.48872	0.0456129	4.03427e-90
ATP6V0D1	1051.97	2.04299	0.0743273	6.06991e-89
DNAJB1	3390.64	1.67044	0.0553623	1.27044e-88
LHFPL2	1227.53	1.95356	0.0698284	2.03757e-88
MSMO1	4171.19	3.50952	0.149421	3.33648e-88
LRP1	7213.22	1.62758	0.0533638	5.89897e-88
CCDC93	2242.47	1.68542	0.0564635	1.68761e-87
NPEPPS	3036.76	1.58272	0.051591	1.38483e-86
DCTN4	3360.68	1.66336	0.0558213	3.21007e-86
MKRN1	4030.4	1.51454	0.0481815	6.19573e-86
PSMD7	2515.28	1.79237	0.0626058	9.63119e-86
TUT7	2182.96	1.7111	0.0584301	1.40021e-85
H2BC21	558.537	2.60324	0.104797	1.97817e-85
HSPA5	13944.9	1.84247	0.0653356	2.7037e-85
MOB3C	717.84	2.33827	0.0911243	3.51949e-85
DERL1	5553.59	1.52383	0.0488658	4.90875e-85
NOCT	401.083	2.9991	0.125929	8.05632e-85
ZBTB40	1706.47	1.78889	0.0628195	1.15681e-84
RBPJ	3134.86	1.9155	0.0695239	1.74697e-84
TFG	5120.14	1.61061	0.05376	3.5963e-84
TSC22D1	5084.1	1.59571	0.0530029	5.77106e-84
KIF21A	2860.59	1.68486	0.0579891	3.59335e-83
MYO18A	5931.18	1.50983	0.0488862	7.43869e-83
WSB1	3088.28	1.5569	0.0513975	1.19501e-82
RAB7A	8473.66	1.55348	0.0512489	1.76018e-82
UBL3	2789	1.60758	0.0542267	2.96624e-82
FBXO42	1353.66	1.9459	0.0723425	5.82449e-82
MVK	822.974	2.2264	0.0872715	8.90763e-82
KDM5B	3138.99	1.54899	0.0512758	1.24573e-81
ABHD2	11035.5	1.34661	0.0406162	2.12913e-81
SMG1	9544.56	1.43386	0.045337	3.62875e-81
PITHD1	1905.95	1.69347	0.0592366	7.12464e-81
PKP3	2476.8	1.65257	0.0571293	1.00889e-80
LAMC1	2282.7	1.65299	0.0572596	1.58241e-80
LAMP2	2881.86	1.67557	0.0585496	3.21571e-80
RNF10	3896.09	1.6037	0.0547276	4.3695e-80
GGA2	2213.32	1.60202	0.054758	8.28793e-80
RAD23B	6539.5	1.46439	0.0474091	1.21468e-79
MSRB1	715.178	2.49318	0.103033	1.88125e-79
RFFL	2036.59	1.64947	0.0574874	2.58731e-79
RNF183	465.709	2.59839	0.108884	3.72545e-79
C9orf72	530.645	2.59679	0.108811	4.91058e-79
FXR1	4076.74	1.49532	0.0492406	6.12033e-79
MADD	3263.92	1.49562	0.049354	8.50179e-79
PPME1	1978.7	1.77711	0.0646184	1.099e-78
AFF4	5409.46	1.54376	0.0519861	1.37441e-78
ARID3B	397.234	2.82885	0.121698	1.67745e-78
MAPK8IP3	1770.94	1.89419	0.0710866	2.1223e-78
EXOC8	1037.59	2.03161	0.0787009	3.52298e-78
NFKB2	1080.27	2.0039	0.077194	4.38383e-78
ZNF562	1603.85	1.84798	0.068717	5.26575e-78
HDAC5	1627.94	1.73162	0.0625372	7.27036e-78
TNFRSF10D	467.629	2.54467	0.10738	1.6867e-77
FAM160A1	681.932	2.48563	0.104698	7.26586e-77
TOR1AIP2	1852.24	1.66766	0.0598103	2.14954e-76
COQ10B	854.748	2.15324	0.087191	1.36506e-75
KDM6A	1952.02	1.76956	0.0661538	1.08825e-74
PGM1	1025.85	1.91014	0.0741926	2.17996e-74
SEMA4B	5436.14	1.61296	0.057607	3.64182e-74
PIM3	1671.41	1.82048	0.0693747	6.40654e-74
KCNK1	768.756	2.1141	0.0858789	9.3466e-74
ARF4	4711.26	1.47421	0.0499901	1.33537e-73
HKDC1	4709.86	1.77329	0.066952	2.14374e-73
SSH1	1400.57	1.78263	0.0674788	2.95389e-73
NNAT	285.799	3.16066	0.145389	4.40696e-73
STK17A	1098.93	1.84033	0.0708736	5.9405e-73
GPX2	10740.3	1.42559	0.0475324	8.43635e-73
CCDC186	2638.25	1.68754	0.0623609	1.11467e-72
CARD19	768.466	2.08002	0.084712	1.59111e-72
ORC1	600.74	2.26819	0.0955999	2.58648e-72
ACO2	1253.76	1.77033	0.0673334	3.62644e-72
C4orf3	1770.3	1.7416	0.0657898	5.20301e-72
BCL10	1047.76	1.88227	0.0741025	1.099e-71
ZFYVE1	411.51	2.71142	0.121575	1.86622e-71
FAM214A	1130.76	1.96245	0.0788281	2.88536e-71
TINAGL1	5293.37	1.40809	0.0472029	4.81833e-71
RAB11FIP5	741.246	2.12609	0.0883899	6.8329e-71
RLIM	3079.96	1.62392	0.0597637	1.17476e-70
ATP2B4	1746.86	1.6993	0.0641344	1.75388e-70
CAMK2G	2327.09	1.6657	0.0622434	2.46545e-70
BAZ2A	6913.59	1.47552	0.0513002	3.21851e-70
EFL1	1738.78	1.68103	0.0631899	4.17962e-70
PSMC1	656.723	2.26304	0.0969241	5.86524e-70
ARF1	9322.62	1.28723	0.0406135	8.32552e-70
ATP6V0A1	1750.22	1.6648	0.0625938	1.32417e-69
CCNC	2014.58	1.67069	0.0629893	2.47833e-69
MACO1	1326.82	1.72028	0.0659147	3.26624e-69
ATP6V1B2	997.684	1.87667	0.0750352	4.19234e-69
HK1	2891.97	1.49712	0.0530386	5.42466e-69
UBE4B	2425.62	1.62183	0.0602932	6.67394e-69
RNASEL	517.635	2.31934	0.10113	1.19562e-68
RSRC2	3368.51	1.52187	0.0546311	1.47753e-68
PPP1R15A	6597.06	1.69189	0.0645796	1.80787e-68
RANBP2	6794.97	1.3986	0.0474838	2.16998e-68
C6orf62	5019.65	1.64218	0.0617315	2.59167e-68
YOD1	1073.27	2.33131	0.102158	3.31719e-68
STK40	2726.33	1.69117	0.0648512	4.68529e-68
HUWE1	16539.1	1.31328	0.042706	6.12896e-68
TANGO2	1090.09	1.90773	0.0776404	8.06616e-68
TBK1	1417.46	1.76397	0.0692187	1.01374e-67
PIGA	665.304	2.28595	0.0999679	1.29409e-67
FDPS	2065.32	1.67234	0.0640877	1.93289e-67
PSMA1	1027.58	1.98616	0.0826401	2.70994e-67
ZSWIM8	959.438	1.87819	0.076443	4.19004e-67
TTC22	664.289	2.16965	0.0938188	6.51265e-67
TNPO1	5976.59	1.38688	0.0475615	1.0386e-66
SLC11A2	3629.36	1.61298	0.0611215	2.26506e-66
MSN	10810.1	1.35161	0.0456298	3.31368e-66
AKIRIN2	928.875	1.92121	0.0795508	4.43665e-66
BRD2	8438.29	1.33747	0.0448653	6.14271e-66
MRGBP	1666.47	1.60421	0.0608274	1.01166e-65
HLA-B	654.897	2.2461	0.0991907	1.27293e-65
NMT1	3679.02	1.41894	0.0498019	1.53854e-65
KEAP1	1332.08	1.78232	0.0715061	1.80857e-65
JMJD1C	5810.24	1.42944	0.0504755	2.15164e-65
MRPS6	665.532	2.08486	0.0899371	4.031e-65
ZBTB7B	1960.95	1.57991	0.0597774	5.48633e-65
IST1	5488.81	1.42482	0.0504744	7.06458e-65
NAXD	2290.93	1.52882	0.056808	1.12725e-64
CCSER2	1216.46	1.96708	0.0832652	1.43486e-64
HELB	280.767	3.01787	0.146778	2.33853e-64
PPP6R1	3588.19	1.52223	0.0565703	2.85023e-64
INSIG2	1621.47	1.71014	0.0679652	3.4855e-64
ADAM17	1570.12	1.66127	0.0652208	5.00968e-64
OSBP	5173.21	1.35814	0.0470594	1.00685e-63
RAB22A	2571.61	1.5565	0.059412	3.66022e-63
PLEKHA8	1185.54	1.72619	0.0698664	6.08348e-63
ZDHHC9	3176.88	1.45401	0.0532075	8.55107e-63
B3GNT5	1158.52	1.87683	0.0793145	1.37342e-62
GOLGA3	2451.88	1.4805	0.0550196	1.99469e-62
IFRD1	4033.75	1.55408	0.0595942	2.78487e-62
LAMTOR5	1148.43	1.78362	0.0740767	6.89555e-62
WDR44	1071.2	1.8397	0.0776424	1.10085e-61
KDM4C	1544.23	1.5942	0.0625205	1.65007e-61
IGSF3	1815.46	1.54242	0.0594002	2.45565e-61
RTN4	6895.92	1.37211	0.048893	3.55707e-61
IRS2	788.921	1.88452	0.080843	5.18557e-61
C18orf25	979.233	1.92636	0.0835388	9.20771e-61
GHITM	8626.7	1.57771	0.0618859	1.19969e-60
PHKG2	700.86	1.97332	0.0867971	1.78524e-60
AKAP13	5395.33	1.36895	0.0493199	6.92592e-60
RBM33	4328.31	1.44112	0.0538946	1.0302e-59
PPP2R5B	509.704	2.18659	0.100858	1.40015e-59
UBB	2466.13	1.6209	0.0652486	1.78852e-59
DSTN	5557.96	1.33107	0.0470281	2.25593e-59
DENND3	1522.35	1.6548	0.0675553	2.99431e-59
SON	7166.77	1.29363	0.0448589	4.36143e-59
SMAD3	4728.22	1.42449	0.0532251	6.37304e-59
TBC1D23	1738.96	1.66561	0.0685647	8.81108e-59
FADS3	651.169	2.00573	0.0903801	1.34711e-58
TMPRSS13	334.194	2.59058	0.127747	2.58168e-58
FTH1	18707.7	3.43596	0.181609	3.23176e-58
ATG2A	1302.97	1.64392	0.0674618	3.89574e-58
PPP1R13L	1185.58	1.70055	0.0711215	5.481e-58
NAA20	1701.79	1.59696	0.0649378	1.25137e-57
MMP7	1490.77	1.61313	0.06604	1.74714e-57
CHP1	3738.25	1.38053	0.0511252	2.83958e-57
TMEM59	5949.55	1.37914	0.0510561	3.45323e-57
CIC	3086.45	1.51156	0.0597069	4.52795e-57
TIPARP	2622.52	1.54399	0.0619327	6.35175e-57
MXI1	1470.11	1.57768	0.0641719	8.66962e-57
NFKBIA	816.461	1.90528	0.085367	1.11007e-56
ZNF222	354.354	2.48042	0.122777	1.48654e-56
RNF11	1399.64	1.70514	0.0726021	1.92077e-56
VEZT	2634.09	1.49372	0.0589203	2.39227e-56
SLC17A5	841.231	1.80315	0.0790107	2.90502e-56
MAPK6	6200.36	1.48824	0.0587263	3.81115e-56
SEC61G	1248.79	1.95976	0.0895017	5.05671e-56
SLC45A4	3036.72	1.47422	0.0579871	6.89193e-56
TSKU	1719.1	1.55991	0.0636155	9.02252e-56
KCTD20	1980.17	1.50921	0.0605257	1.76728e-55
TEC	368.853	2.48109	0.124302	2.40367e-55
RPS6KC1	954.892	1.73343	0.075352	3.17812e-55
MTPN	6938.25	1.46688	0.0580526	4.83016e-55
BRF2	167.684	3.78218	0.210875	7.44022e-55
SPTY2D1	1835.3	1.61731	0.0681195	1.03303e-54
SYNRG	2641.78	1.37807	0.0523395	1.62478e-54
EEF2	49054.4	1.17797	0.0391589	1.96648e-54
RICTOR	3026.94	1.47091	0.0585951	2.45715e-54
SLC30A1	1574.99	1.77176	0.0786972	3.34723e-54
SMURF1	2436.53	1.50601	0.061206	4.79478e-54
SND1	7324.26	1.21165	0.0416728	6.47541e-54
NXPH4	290.537	2.65365	0.13792	9.51186e-54
ATP6V1E1	1723.59	1.55518	0.0646945	1.26518e-53
BABAM1	453.297	2.33538	0.116884	1.69638e-53
MPZL3	1543.13	1.64225	0.070604	2.13232e-53
RAB1A	4267.36	1.36379	0.0521117	2.81177e-53
CALB2	1342.39	1.59677	0.0677443	3.59563e-53
LEMD3	1345.7	1.601	0.0681065	4.61278e-53
GRIN2D	944.887	1.9491	0.0914975	5.78048e-53
CCDC47	4039.93	1.34116	0.0507961	7.40521e-53
INO80	2880.09	1.38992	0.0541472	9.61941e-53
ABCF3	1102	1.63099	0.0703708	1.41045e-52
LIN54	1966.66	1.57281	0.06649	1.66269e-52
NIPA1	1962.93	1.49545	0.0613309	1.96257e-52
TPT1	49421.7	1.25608	0.0452239	2.58771e-52
SLMAP	2741.65	1.493	0.0612291	3.29451e-52
PRDM10	643.697	2.09078	0.101572	3.69846e-52
RPN1	9323.15	1.24957	0.0448337	4.10985e-52
FAM217B	810.58	1.90435	0.0890582	4.57933e-52
LIMCH1	1933.37	1.58864	0.0677493	5.05019e-52
HIF1A	2697.84	1.38837	0.0542426	5.5436e-52
CLPB	729.271	1.83845	0.0846649	6.08298e-52
GPATCH3	381.831	2.2904	0.115261	6.69823e-52
CHPF2	1113.6	1.66568	0.0730619	7.35665e-52
SPIRE1	1120.27	1.93428	0.0912404	8.7247e-52
FXR2	870.537	1.74837	0.0787706	9.6384e-52
USP9X	5752.72	1.29549	0.0481285	1.06432e-51
ATP6V1D	1235.19	1.68022	0.0743621	1.23197e-51
FGD6	1281.66	1.59298	0.0684914	1.42965e-51
BBS4	792.605	1.80756	0.0832051	1.9482e-51
WLS	3207.19	1.32442	0.0505154	2.58479e-51
SEC14L1	1909.51	1.43867	0.0585342	3.98097e-51
RNF181	952.875	1.67761	0.0749432	5.47993e-51
SERINC1	4207.46	1.53017	0.0650489	8.55265e-51
MGAT4B	4569.34	1.25994	0.046491	1.222e-50
GATAD2B	1552.59	1.49627	0.0630366	2.91044e-50
CLCC1	682.954	1.80831	0.0846438	3.85909e-50
SPSB1	373.679	2.27998	0.117419	5.07861e-50
ARHGEF7	2597.76	1.3457	0.0527155	6.38064e-50
XAB2	803.683	1.76289	0.0817663	8.24736e-50
STAM	1045.05	1.79454	0.0840881	1.07915e-49
UBR2	1819.87	1.5068	0.064092	1.33912e-49
BSDC1	3478.35	1.38483	0.0556239	1.61065e-49
TNKS	1089.03	1.75513	0.0815252	2.00879e-49
OSBPL9	2890.3	1.3064	0.0502871	2.4484e-49
RNF111	1770.95	1.539	0.0665894	3.02807e-49
ANXA2	29351.5	1.15777	0.0399842	3.61822e-49
EMC3	907.523	1.702	0.0780971	4.4353e-49
KRT20	8602.83	1.21857	0.0443353	5.40486e-49
ZBTB21	1439.99	1.50769	0.0645803	6.41809e-49
ILRUN	4317.09	1.26894	0.0480755	1.03501e-48
R3HCC1L	798.245	1.79187	0.0849704	1.37308e-48
NPC2	973.35	1.62728	0.0734141	1.74161e-48
SSH2	923.273	1.66352	0.0759759	2.11823e-48
PLAA	1862.68	1.44421	0.0609123	4.20397e-48
TSC22D2	1365.88	1.54718	0.0682481	5.70585e-48
ARFGAP1	2828.23	1.43773	0.0605927	9.58985e-48
CSRNP1	715.159	2.19382	0.114512	1.25858e-47
FAM214B	645.334	1.85576	0.0907701	1.86125e-47
CD63	8078.5	1.17828	0.0426395	5.55222e-47
UBAP1	2610.56	1.34132	0.054401	7.89069e-47
GDAP2	785.998	1.75724	0.0843185	1.02352e-46
UGT1A10	1356.79	1.5636	0.070422	1.27906e-46
WHAMM	668.142	1.82085	0.0889522	1.54462e-46
WDR62	1331.47	1.54429	0.0691759	1.92603e-46
MOB2	1248.61	1.63531	0.0757545	2.32216e-46
SBNO1	2863.78	1.35516	0.0555683	2.74489e-46
TMBIM1	6631.45	1.24004	0.0472849	3.20688e-46
TIAF1	295.363	2.38662	0.130092	3.69998e-46
VRK3	1624.77	1.4471	0.0622586	4.20283e-46
GRB2	3819.12	1.28141	0.050354	4.8371e-46
RAP2B	1233.53	1.60481	0.0737914	5.5683e-46
MROH1	1467.48	1.49686	0.0661744	6.85059e-46
NSDHL	1378.46	1.50314	0.0666674	8.27472e-46
LRRFIP2	1190.63	1.59522	0.0733745	9.77789e-46
ZBTB5	889.943	1.70311	0.0812498	1.14244e-45
SNX9	1294.07	1.51413	0.0675235	1.3096e-45
GUK1	2871.51	1.32363	0.0537674	1.53757e-45
LONP1	2742.19	1.36496	0.056944	1.93691e-45
POFUT2	872.377	1.63548	0.0767597	2.40702e-45
UNC45A	1942.61	1.45342	0.0634573	2.87657e-45
FNIP2	1428.13	1.5106	0.0676524	3.36855e-45
SLC22A18	1792.7	1.45908	0.0638962	3.8735e-45
KMT2D	5536.72	1.26417	0.0496884	5.02577e-45
PLEKHM1	906.248	1.69156	0.0810563	5.76599e-45
CENPJ	1380.81	1.50477	0.0674041	6.57e-45
TNS1	1345.33	1.57142	0.0723153	7.43132e-45
BLMH	295.146	2.395	0.132777	8.40389e-45
ACIN1	4188.13	1.27712	0.0507918	9.43965e-45
ANXA7	2844.33	1.43075	0.0620825	1.05299e-44
OTULIN	1536.64	1.44641	0.0632829	1.17963e-44
DPY19L1	1110.33	1.58266	0.0734861	1.38681e-44
ZNF516	773.742	1.70506	0.082646	1.67334e-44
ZNF823	503.344	1.99274	0.103948	2.31978e-44
EWSR1	9664.63	1.16036	0.0425588	3.10797e-44
CHORDC1	1269.48	1.48717	0.0667711	3.60577e-44
CIB1	2618.98	1.42561	0.0622255	4.11856e-44
TM2D2	376.358	2.09983	0.112148	4.64433e-44
BMP2	466.292	1.9677	0.102604	5.44887e-44
ISG20	461.067	2.06967	0.110216	6.31451e-44
AKAP8L	751.383	1.70838	0.0834604	7.31164e-44
MACIR	642.516	1.78007	0.0889103	8.59638e-44
AHSA1	1782.86	1.42217	0.0624704	1.23872e-43
UPP1	503.066	2.04449	0.109192	2.16958e-43
CSDE1	20306.6	1.13679	0.0413355	2.60998e-43
FRMD5	502.342	1.96784	0.103613	3.06984e-43
NAPA	1549.17	1.43895	0.0641712	3.8426e-43
FAM83G	1457.3	1.48283	0.0674901	4.65964e-43
TMEM159	730.832	1.84149	0.0946456	5.8398e-43
YEATS2	2471.92	1.31413	0.0551048	7.9543e-43
EEF1A2	910.19	1.73845	0.0872167	1.02696e-42
HSPA13	1344.98	1.65853	0.0813988	1.40294e-42
NDUFA4	2799.71	1.45462	0.066072	1.93778e-42
LRRC8A	1154.24	1.53629	0.0723128	2.52099e-42
DDX24	2535.5	1.30604	0.0548536	3.18839e-42
H2BC5	302.618	2.30825	0.131332	4.76922e-42
NCOA3	2979.72	1.28058	0.0530647	6.89622e-42
EEF1A1	122013	1.09136	0.0387735	8.93366e-42
SURF4	4864.84	1.21619	0.0483738	1.12999e-41
PLEKHA1	1959.9	1.37296	0.0604355	1.40068e-41
ABCC1	1831.12	1.38207	0.0612201	1.74472e-41
POLR2B	3753.44	1.27351	0.0528865	2.09263e-41
ANKRD22	672.384	1.73142	0.0880842	2.45788e-41
PISD	755.023	1.66329	0.0830278	2.98473e-41
PDP2	616.691	1.78422	0.0925313	3.73325e-41
RNF114	1941.12	1.3199	0.0567221	5.29765e-41
ST13	2945.85	1.43687	0.0658892	6.41739e-41
SS18L1	1343.02	1.45627	0.0673935	7.54658e-41
ATP6V1H	876.655	1.62548	0.0805173	8.76353e-41
SFXN5	1052.94	1.5567	0.0751994	9.98996e-41
STIP1	6484.17	1.15537	0.0442195	1.16354e-40
TNRC6B	1170.48	1.4724	0.0688027	1.33036e-40
TRIM2	1762.22	1.49581	0.0707575	1.56259e-40
TSC22D4	1390.16	1.46239	0.068269	1.86485e-40
MED13	6580.99	1.21008	0.0487301	2.27883e-40
EIF1	15621.8	1.33857	0.05881	2.77283e-40
ZNF160	1425.85	1.41033	0.0644139	3.27154e-40
PRDM2	1355.61	1.48562	0.0703001	3.782e-40
SARAF	1252.81	1.5605	0.0761511	4.29831e-40
CDA	255.329	2.40203	0.141997	4.91699e-40
GRB7	1344.42	1.44334	0.0670877	5.54779e-40
FICD	253.794	2.52132	0.151435	6.24767e-40
DCTN2	2061.67	1.30086	0.0559983	6.97013e-40
CLTB	668.628	1.70695	0.087969	8.95901e-40
SART3	1706.56	1.35063	0.0600645	1.01167e-39
SKP1	2944.75	1.35973	0.0608618	1.15649e-39
MEF2D	1305.81	1.44712	0.0677686	1.31622e-39
WIPI2	2157.14	1.35465	0.0605148	1.48247e-39
PINK1	300.145	2.31907	0.136413	1.66346e-39
ZNF791	820.21	1.61141	0.0811037	2.0351e-39
HMGXB3	1953.99	1.30435	0.0568889	2.87846e-39
EMSY	1275.15	1.4366	0.0673543	3.30875e-39
FASTKD5	845.152	1.60149	0.0804342	3.77394e-39
TRAFD1	667.554	1.70721	0.0888167	4.25306e-39
HGS	2033.36	1.32107	0.0583227	4.8271e-39
TOB1	1351.42	1.51581	0.0738366	5.51578e-39
EYA3	997.158	1.50482	0.0729672	6.2076e-39
CANX	23061.4	1.1443	0.0443788	6.92329e-39
MAP1LC3B	3520.56	1.53536	0.0755893	7.97842e-39
ARHGAP17	593.271	1.71909	0.0902588	9.14176e-39
FRK	998.789	1.53164	0.075366	1.03675e-38
SDE2	1190.77	1.42962	0.0673119	1.18046e-38
AP1G1	4765.83	1.22398	0.0509977	1.36118e-38
CCDC32	521.915	1.82429	0.0989826	1.56495e-38
TMPRSS4	2606	1.29435	0.0567363	1.81882e-38
MAFK	1341.72	1.45542	0.0698873	2.54071e-38
ASAH1	1374.48	1.448	0.0694074	3.61994e-38
CA12	5368.82	1.2251	0.0515067	4.26814e-38
ARAP1	2716.17	1.26069	0.0544127	4.9993e-38
DDIT4	5419.51	2.23809	0.133316	5.92022e-38
GNA13	1863.66	1.423	0.067946	8.01895e-38
LARP4	2782.05	1.30924	0.0587764	1.04333e-37
FBXO32	2999.24	1.25292	0.0542487	1.31512e-37
ELL	419.698	1.94393	0.110415	1.60456e-37
JMY	2121.76	1.47672	0.0725165	1.93388e-37
FLII	3210.53	1.21411	0.0511757	2.27676e-37
ACAT2	1341.4	1.39899	0.0662734	3.01488e-37
SLC10A7	473.77	1.8774	0.105508	3.60606e-37
ACAP2	2014.01	1.41133	0.067547	4.32279e-37
ZBTB34	715.463	1.65532	0.0876011	5.18831e-37
GRN	5782.7	1.17118	0.0480432	6.25057e-37
CLDN12	4642.39	1.34819	0.0627067	7.79283e-37
DAPK1	2339.49	1.28369	0.0574745	9.62718e-37
PTGES3	8576.65	1.27206	0.0565436	1.15875e-36
USP47	2978.53	1.26374	0.055991	1.43696e-36
RTCA	1403.57	1.39756	0.0670674	1.7394e-36
TMEM259	1791.97	1.32243	0.0609368	2.09737e-36
RHPN2	2582.76	1.25405	0.0555211	2.76451e-36
DDX39B	2689.71	1.2508	0.0553458	3.61901e-36
SH3GL1	933.047	1.49671	0.0758387	4.56366e-36
ZFAND3	2215.95	1.30505	0.0599076	5.53381e-36
ATP6V1G1	1660.29	1.35017	0.0636814	6.5469e-36
ATXN2L	4340.91	1.1869	0.0502155	7.98811e-36
C1orf52	596.864	1.6777	0.0911881	9.49362e-36
ATG4D	348.196	2.01914	0.119704	1.10406e-35
FLYWCH1	568.015	1.74749	0.0970355	1.25952e-35
SEC61B	1166.58	1.40641	0.068582	1.42012e-35
BAHD1	1184.84	1.39373	0.0675788	1.60079e-35
AMPD3	411.876	1.96257	0.115152	1.79124e-35
LRP8	2631.14	1.47883	0.0747293	1.98602e-35
CUL1	3217.75	1.19365	0.0510402	2.28552e-35
ADIPOR2	4408.3	1.17738	0.0497344	2.63946e-35
CLCN6	631.605	1.78489	0.100841	3.05096e-35
TBC1D20	1561.19	1.3621	0.0653366	3.48619e-35
RC3H1	1233.9	1.52829	0.0794828	4.08039e-35
PPP1R11	1383.76	1.37083	0.066277	4.75704e-35
PJA2	2073.41	1.33241	0.0630731	6.19148e-35
RASEF	3386.67	1.2606	0.0570513	6.99641e-35
HSD17B7	299.639	2.12439	0.130089	7.89034e-35
ACTR1A	1763.97	1.31466	0.0616746	8.80786e-35
GTPBP1	1603.06	1.32857	0.0628826	9.79388e-35
IGF2R	6630.27	1.10602	0.0440681	1.0795e-34
IMPAD1	1684.79	1.34846	0.0645777	1.18074e-34
KCTD6	234.099	2.29597	0.144747	1.28448e-34
SSNA1	980.723	1.52128	0.079272	1.40024e-34
IKZF5	677.815	1.75828	0.0993491	1.51777e-34
RAB40C	921.23	1.64102	0.0895721	1.66711e-34
BLOC1S3	564.483	1.77743	0.101236	1.83711e-34
DIPK2A	309.242	2.16416	0.134072	2.0075e-34
HYOU1	5681.08	1.13877	0.0470323	2.18511e-34
COPS2	4266.98	1.3167	0.0623059	2.44156e-34
MICA	633.769	1.63994	0.0899109	2.73212e-34
NDUFB9	4951.43	1.13566	0.0469723	3.05796e-34
SLC66A1	297.005	2.07929	0.12767	3.46679e-34
OPA3	1192.94	1.42119	0.0715883	4.00641e-34
MAP7D1	1217.9	1.55178	0.0828296	4.60337e-34
GPC1	433.351	1.86635	0.109815	5.22628e-34
ISCA1	709.814	1.65622	0.0918205	5.86199e-34
RHEB	3164.84	1.24321	0.0564286	6.50896e-34
TRIM16L	285.516	2.14232	0.133852	7.43317e-34
CHD6	3325.62	1.19367	0.0524957	1.03668e-33
ARHGAP27	2259.36	1.29506	0.0615095	1.30215e-33
MGST3	824.42	1.54038	0.0828321	1.88988e-33
BOD1	1428.58	1.35592	0.0668673	2.20422e-33
MARCHF6	5908.69	1.13545	0.0478267	2.59882e-33
PRSS22	851.305	1.51785	0.0810889	3.41887e-33
MBD4	1770.26	1.32868	0.064757	4.4179e-33
SPG7	2266	1.37818	0.0691912	5.08631e-33
TESK1	563.109	1.76685	0.103233	5.88395e-33
STRAP	3958.53	1.18425	0.0524515	8.82054e-33
ACOX1	1702.21	1.30025	0.0626048	9.86109e-33
MBP	1466.59	1.31587	0.0640043	1.09723e-32
TAF13	465.398	1.82679	0.108758	1.20989e-32
KIAA1191	2158.8	1.23167	0.0566888	1.33648e-32
GLRX3	2313.78	1.25722	0.0591156	1.52848e-32
NFIL3	846.969	1.51859	0.0821023	1.72111e-32
CRY1	653.958	1.56795	0.086617	1.97145e-32
RAB3GAP1	3063.61	1.23859	0.0576529	2.25642e-32
HNRNPH2	1732.05	1.27724	0.0610942	2.56111e-32
RETREG1	266.785	2.23817	0.146122	2.93252e-32
TRIM28	7089.94	1.10769	0.0462159	3.31755e-32
SPINT2	5388.03	1.15243	0.0502279	4.18369e-32
EIF4B	8820.23	1.0955	0.0452072	4.65121e-32
EXPH5	1697.29	1.26233	0.0599858	5.12466e-32
PHKB	2498.83	1.20626	0.0550353	5.61389e-32
EIF2A	5978.71	1.13341	0.0486018	6.12957e-32
RAB5IF	268.266	2.38371	0.159483	6.67992e-32
SUDS3	2273.51	1.21909	0.0562837	7.31061e-32
HMGA1	13927.6	1.15792	0.0508638	7.95528e-32
KCTD11	341.214	1.92962	0.119691	8.86333e-32
HIVEP2	1554.37	1.27938	0.0620166	1.02459e-31
HERPUD1	3314.28	1.1592	0.0513693	1.19531e-31
SMIM29	244.101	2.15943	0.140965	1.38497e-31
MORF4L1	5915.92	1.14994	0.0506645	1.61651e-31
MAP3K9	806.918	1.4608	0.078601	1.87127e-31
REXO2	1435.75	1.29437	0.0638054	2.20691e-31
KCTD5	1445.5	1.35253	0.0691534	2.98096e-31
SUPT5H	4428.55	1.13722	0.0497716	3.41125e-31
TMOD3	3209.12	1.14148	0.0503098	4.03988e-31
HTATIP2	2017.69	1.30025	0.06476	4.79672e-31
TAF6L	398.783	1.87981	0.117494	7.61542e-31
NMB	442.801	1.73292	0.104202	8.65078e-31
E2F6	545.144	1.69456	0.101197	1.1615e-30
ARFGAP3	997.76	1.39339	0.0737572	1.35371e-30
KIAA0232	2702.93	1.18549	0.0548392	1.56805e-30
ARMCX3	1462.18	1.36834	0.071652	1.8283e-30
UXS1	1211.18	1.40405	0.0749588	2.1059e-30
SEC13	1491.79	1.25945	0.0617783	2.41326e-30
GOLGA2	2782.71	1.15999	0.0526906	2.73624e-30
CREBZF	3100.3	1.23732	0.0598141	3.41264e-30
ABCF1	2117.97	1.19846	0.0563994	3.88903e-30
ABHD17B	526.577	1.71865	0.104225	4.36663e-30
TMEM165	1517.47	1.26645	0.0627088	4.89806e-30
TOLLIP	1411.84	1.28419	0.0643426	5.96317e-30
TMEM208	577.758	1.7159	0.104078	6.49988e-30
RSBN1	616.057	1.61818	0.0952281	7.14199e-30
TRIM31	2850.6	1.17551	0.0544469	7.80969e-30
GNA15	258.252	2.02501	0.132901	8.5603e-30
TM2D3	771.642	1.45532	0.0803873	9.38262e-30
SH3BGRL3	2950.31	1.25052	0.0615264	1.11822e-29
SERINC5	3395.39	1.17959	0.0549736	1.21022e-29
C16orf72	1943.03	1.2484	0.0613385	1.3026e-29
ZNF654	360.367	1.8749	0.11933	1.40145e-29
JUP	8253.44	1.14682	0.052042	1.5159e-29
H2AC6	854.032	1.48955	0.0838935	1.64875e-29
XRN1	1523.52	1.39598	0.0753945	1.95731e-29
SREBF1	3419.22	1.15356	0.0528651	2.13517e-29
ALDH2	1881.18	1.21372	0.0584698	2.31689e-29
SIRT2	1967.03	1.26142	0.0629869	2.52807e-29
EIF2AK3	858.445	1.42734	0.0785448	2.77606e-29
NXF1	1899.38	1.24769	0.0618019	3.02733e-29
EDEM1	1066.67	1.3742	0.0737577	3.34952e-29
HLA-E	3272.03	1.18325	0.0560492	4.17029e-29
NFKBIB	1031.46	1.35754	0.0723789	4.59737e-29
LMO7	7423.49	1.07701	0.046147	5.08081e-29
SAFB2	1097.3	1.45731	0.0819448	5.66106e-29
STARD7	3817.34	1.11112	0.0495201	6.38427e-29
RAB40B	408.091	1.72176	0.107113	7.20566e-29
GDF15	11861.3	2.12092	0.144741	8.03758e-29
HARS1	1636.92	1.22101	0.0599491	8.88606e-29
TBCA	1338.82	1.40723	0.077527	9.76786e-29
KCTD9	814.091	1.4127	0.0780529	1.06612e-28
OTUD3	534.647	1.60609	0.0963011	1.15662e-28
GSTP1	10970.9	1.04114	0.043074	1.26053e-28
CTNNA1	12523.1	1.12694	0.0511765	1.36458e-28
NR1H2	1233.22	1.40445	0.0775309	1.60679e-28
ZFX	1345.33	1.275	0.0652927	1.73795e-28
TRAPPC2B	186.542	2.32934	0.165121	1.87504e-28
PTTG1IP	4281.09	1.08002	0.0469551	2.04671e-28
GPR75	149.941	2.49316	0.18119	2.24103e-28
INO80D	1146.38	1.34968	0.0727107	2.46692e-28
SEC24C	1446.76	1.25497	0.0637291	2.93348e-28
OPTN	1688.21	1.31121	0.0691123	3.18113e-28
DNAJA2	1821.41	1.21487	0.0600172	3.71558e-28
RELA	2168.27	1.21024	0.0595882	4.0049e-28
SAMD8	906.74	1.41738	0.0793471	4.30178e-28
LIMK1	618.081	1.5036	0.0878121	4.70737e-28
SNX13	1955.21	1.25197	0.0638553	5.18608e-28
HSD17B4	3839.09	1.11087	0.050475	6.44001e-28
ATXN1	3126.95	1.16644	0.0558821	7.16972e-28
LIPH	1587.7	1.25221	0.0641783	7.96824e-28
KDM7A	1236.42	1.27594	0.066462	8.76851e-28
HHLA2	1350.7	1.30113	0.0689276	9.62328e-28
ABHD5	400.864	1.73762	0.11103	1.05584e-27
PEA15	1414.38	1.28442	0.0674613	1.16315e-27
CNBP	9331.99	1.09227	0.0489445	1.27419e-27
PFDN4	1299.87	1.3215	0.0711776	1.53244e-27
ITGAV	3495.84	1.15952	0.0555248	1.66509e-27
VDAC2	1345.13	1.35568	0.0745947	1.9679e-27
SOD2	1096.82	1.43757	0.0825281	2.1253e-27
ATP7A	1004.11	1.35737	0.0747718	2.28388e-27
PHC3	2311.04	1.30811	0.070263	2.9448e-27
YPEL2	1325.57	1.27746	0.0675304	4.31383e-27
LURAP1L	874.377	1.44657	0.0840321	4.66468e-27
ETV3	875.89	1.39902	0.0794185	5.02659e-27
ZNF317	811.052	1.38762	0.0783176	5.39393e-27
MED31	115.643	2.791	0.215458	5.80075e-27
TNFRSF10A	342.357	1.86492	0.125022	6.21089e-27
PPP2R2A	1253.28	1.29706	0.0696364	6.67495e-27
USP32	1660.25	1.20952	0.0611487	7.68809e-27
SMIM14	1508.18	1.2389	0.0641758	8.8979e-27
SYVN1	1524.46	1.24598	0.0649862	1.05023e-26
TTBK2	857.265	1.40061	0.0802132	1.13377e-26
ZFHX3	1286.52	1.2401	0.0644538	1.22072e-26
TMEM167B	1074.37	1.38408	0.078632	1.30906e-26
B2M	12860.9	1.17846	0.0584033	1.39791e-26
UBXN6	1484.6	1.22081	0.0626244	1.49502e-26
HNRNPL	5283.42	1.06741	0.0475448	1.5984e-26
BCL6	612.839	1.62573	0.102575	1.70252e-26
CAPZA1	5501.13	1.13891	0.054608	1.91297e-26
ANXA10	1678.73	1.20938	0.0617195	2.05362e-26
UBE2M	2250.27	1.18972	0.0598046	2.20117e-26
DOLPP1	976.19	1.36081	0.0767419	2.35224e-26
CBFA2T2	1424.27	1.29857	0.0705936	2.50489e-26
NUP153	2944.91	1.10442	0.0514174	2.82324e-26
TRAF6	1009.39	1.3238	0.0731322	2.98492e-26
PIAS1	2175.37	1.16508	0.0574281	3.14811e-26
UBE2I	1661.01	1.32374	0.0732134	3.49437e-26
CACUL1	2012.1	1.21949	0.0629671	3.90137e-26
ZBTB1	1218.72	1.30253	0.0712665	4.35058e-26
SPTSSA	358.152	1.76282	0.117488	4.98682e-26
CENPX	773.047	1.50663	0.0921692	5.90431e-26
RND1	564.954	3.39153	0.280847	6.39343e-26
LPCAT1	1453.9	1.2814	0.0697311	6.91128e-26
NDEL1	822.901	1.3519	0.0768548	7.99843e-26
PPP2R1A	4285.39	1.10646	0.0524033	9.3881e-26
PFKFB2	982.659	1.35394	0.0773412	1.01991e-25
RPL36AL	1214.99	1.23834	0.0657928	1.19872e-25
HSD17B12	2027.76	1.31747	0.0737942	1.29406e-25
RAB17	1195.24	1.32171	0.0742607	1.39441e-25
SERTAD1	716.344	1.48417	0.0907374	1.50649e-25
EIF1AD	748.357	1.41396	0.0836765	1.62172e-25
BAIAP2	1188.61	1.27115	0.0694421	1.9085e-25
ZCCHC17	742.981	1.39298	0.0819012	2.08275e-25
NRDC	4181.37	1.11779	0.0540509	2.2709e-25
AP4B1	344.18	1.73651	0.116818	2.45946e-25
GGNBP2	4795	1.0403	0.0462035	2.6526e-25
PGPEP1	1935.08	1.17223	0.0596728	2.87373e-25
ELL2	973.512	1.31805	0.074505	3.09901e-25
RPLP0	29888.6	1.02485	0.044827	3.62195e-25
LARP4B	2851.3	1.1057	0.0530922	3.92922e-25
DNM1	3491.61	1.13988	0.0566556	4.28051e-25
REL	648.073	1.5647	0.100082	4.64994e-25
KDM6B	1209.95	1.35348	0.0785286	5.02989e-25
RAB20	1364.18	1.21997	0.0649251	5.43222e-25
FAM168B	4787.67	1.05515	0.0480944	5.85154e-25
GRHL1	496.879	1.54257	0.0979622	6.27456e-25
EPG5	1054.86	1.30364	0.0736178	6.75578e-25
SRP68	1965.75	1.15484	0.0584494	7.29876e-25
UBE2R2	2494.04	1.13086	0.0560124	7.86229e-25
PPIF	1525.42	1.21127	0.0642732	8.43429e-25
EAF2	148.33	2.40335	0.186922	9.10642e-25
CAMSAP1	2080.17	1.12992	0.0561478	9.94373e-25
ATG14	515.93	1.5672	0.101246	1.08166e-24
DAZAP2	4127.64	1.15437	0.0587175	1.17229e-24
ERP44	1650.53	1.20032	0.0634818	1.35765e-24
POC5	875.099	1.34286	0.0783805	1.47668e-24
YKT6	3311.21	1.07299	0.0505093	1.60456e-24
PFN2	3583.1	1.1455	0.0580635	1.74293e-24
SEC24B	1674.79	1.21052	0.0648882	1.90059e-24
ZNF761	766.529	1.34517	0.0789822	2.24323e-24
LIMS1	723.778	1.56857	0.10238	2.46047e-24
SNIP1	551.407	1.48744	0.0939491	2.68046e-24
ZNF24	2732.72	1.2063	0.0648299	2.95266e-24
ARL8A	653.625	1.43471	0.088695	3.23405e-24
CHKA	1038.82	1.28618	0.0732486	3.53629e-24
IGF1R	1599.39	1.27661	0.0723155	3.86486e-24
ZNF503	307.562	1.85634	0.133019	4.21441e-24
SDF2	861.408	1.37272	0.0827996	5.27833e-24
ZNF484	344.637	1.72508	0.119858	5.82032e-24
GAK	2402.33	1.14446	0.0589039	6.43936e-24
CLIP2	469.679	1.6031	0.107234	7.08116e-24
HAUS8	281.044	1.79943	0.127915	7.72355e-24
EIF3I	4025.94	1.07959	0.0521407	8.41598e-24
CHMP2B	841.316	1.39679	0.0856249	9.14338e-24
IPMK	454.324	1.59865	0.10703	9.94457e-24
MPHOSPH10	1444.36	1.21061	0.0660808	1.07702e-23
TSPYL2	865.436	1.3267	0.0783923	1.25091e-23
INAVA	1256.62	1.29828	0.0753959	1.42629e-23
CEP350	2598.26	1.10308	0.054852	1.52783e-23
JKAMP	673.328	1.37924	0.084126	1.63351e-23
NUFIP2	6323.33	1.10799	0.0555296	1.76469e-23
SPNS2	1620.9	1.19545	0.0648193	1.89653e-23
ULBP2	152.319	2.28646	0.180861	2.04217e-23
CLASRP	1156.82	1.37074	0.0835521	2.19198e-23
TMBIM6	23625.8	0.965945	0.0406337	2.54067e-23
OGFR	1685.12	1.19114	0.0650694	3.65442e-23
VPS18	795.645	1.37076	0.0845595	4.08522e-23
IPO13	629.093	1.43843	0.0918543	4.52091e-23
YTHDF3	2164.14	1.13665	0.0593913	5.40113e-23
AK4	915.835	1.28098	0.0749296	5.84624e-23
BUD23	1844.7	1.16127	0.0620785	6.76263e-23
JUND	1901.78	1.23298	0.0698156	7.23659e-23
ATG9A	1013.54	1.2536	0.072068	7.72811e-23
RNF169	899.309	1.29292	0.0763509	8.2456e-23
DDX41	1262.63	1.24103	0.0708109	9.3312e-23
TRAPPC8	1354.73	1.23774	0.0706857	1.06754e-22
PPP1R12B	1037.06	1.24105	0.0710615	1.1424e-22
PIK3C3	705.083	1.34371	0.0823232	1.22932e-22
IDH1	5389.62	1.0247	0.0477337	1.40698e-22
UBA52	4663.4	1.02111	0.0474547	1.51734e-22
TAF1D	4370.07	1.10478	0.0565813	1.6316e-22
AMFR	1119.62	1.21149	0.068527	1.80411e-22
YTHDF1	2255.06	1.10917	0.0574489	2.00771e-22
MAEA	1766.08	1.1283	0.0596699	2.47925e-22
NDFIP1	1413.88	1.17656	0.0649802	2.72465e-22
UBE2H	4482.67	1.01399	0.0472139	3.01239e-22
STX1A	783.91	1.38571	0.0882971	3.35244e-22
TRIP12	8380.14	1.01293	0.0472122	3.70503e-22
RGCC	217.194	1.93931	0.149485	4.07273e-22
SPTAN1	7757.86	0.966718	0.0421452	4.4467e-22
ADAM15	2134.79	1.11102	0.0581793	4.87963e-22
NT5C3A	2480.91	1.19945	0.0681716	6.50707e-22
RPL18	17206.3	0.987246	0.0446645	7.10304e-22
GAN	330.73	1.72585	0.126687	7.70544e-22
ANKRD12	2106.93	1.12733	0.0602505	8.32775e-22
WAPL	3486.2	1.0554	0.0523298	9.02167e-22
GOLGA4	3600.89	1.07897	0.0550878	1.05812e-21
MICU1	1594.1	1.15176	0.0633004	1.154e-21
GSK3B	3683.25	1.0537	0.0523611	1.2517e-21
SETD5	3784.43	1.01466	0.0480906	1.3653e-21
PAFAH1B1	3005.42	1.09424	0.0570352	1.60465e-21
PDCL	593.547	1.37188	0.0883826	1.75573e-21
EGLN2	521.662	1.42816	0.0947809	1.91679e-21
RSRP1	2388.55	1.09371	0.0571959	2.0799e-21
GPBP1	3061.52	1.1232	0.0606398	2.273e-21
RPS9	14167.2	0.939081	0.040001	2.51105e-21
ZNF143	561.984	1.43983	0.0965806	2.75195e-21
DDX3X	8299.17	1.01306	0.0484359	3.02225e-21
USP35	267.645	1.74095	0.130971	3.32322e-21
ACER2	160.251	2.10507	0.17223	3.62475e-21
DPCD	514.686	1.48563	0.102124	3.94441e-21
MDM4	1659.99	1.13298	0.0622257	4.96576e-21
AGTPBP1	1535.1	1.17404	0.0669226	5.70354e-21
GADD45A	1926.68	1.21074	0.0711347	6.09161e-21
ISCU	1545.75	1.19193	0.0690751	6.51557e-21
DYRK1A	1520.63	1.12551	0.0615328	6.94833e-21
DPP3	1504.66	1.12588	0.0615803	7.38351e-21
SIRT7	1033.71	1.23209	0.0738697	7.92023e-21
KIAA0355	1685.6	1.14161	0.0635855	8.48598e-21
VPS4B	1370.66	1.19179	0.0693499	9.07227e-21
CLCN7	889.37	1.23562	0.0743622	9.65989e-21
ZNF335	818.861	1.30968	0.0828716	1.14625e-20
CCNT2	1847.8	1.1684	0.0667759	1.21176e-20
GAB2	454.926	1.48842	0.10356	1.3548e-20
GADD45G	90.1732	2.72551	0.245401	1.42916e-20
MACF1	7417.67	0.949131	0.0418187	1.5136e-20
SEL1L3	5549.18	1.00903	0.048698	1.59812e-20
FRRS1	501.423	1.4768	0.102465	1.68579e-20
YWHAQ	5364.41	1.01933	0.0499569	1.78066e-20
C12orf10	704.589	1.31227	0.0837983	1.88946e-20
ZNF697	254.172	1.8333	0.143846	1.99913e-20
ICAM1	200.538	1.88895	0.150452	2.34659e-20
ST14	7748.46	1.01186	0.0492584	2.46785e-20
STXBP3	1266.92	1.23982	0.0756434	2.59939e-20
GOLPH3L	1627.27	1.11102	0.060772	2.73174e-20
PIP4P1	654.753	1.37394	0.0913044	2.88296e-20
CIR1	995.044	1.26904	0.079222	3.04256e-20
FHOD1	396.328	1.54588	0.111394	3.21458e-20
PEX14	460.829	1.46498	0.102033	3.3887e-20
BRWD3	1486.6	1.20172	0.0715932	3.57875e-20
MORC3	992.731	1.25984	0.0783535	3.77125e-20
AHDC1	805.328	1.28654	0.0815108	3.97409e-20
FBRS	2113.31	1.11302	0.0616207	4.25593e-20
SLC30A6	1260.51	1.15858	0.0669777	4.55084e-20
TRMT112	1643.13	1.10544	0.0607943	4.853e-20
PRR5L	1766.05	1.09881	0.0600676	5.17331e-20
BTBD7	1088.89	1.20268	0.0722157	5.49544e-20
RPS3	35520.2	0.947807	0.0424599	5.84114e-20
RETREG3	1139.16	1.18756	0.0707334	7.52007e-20
PANK4	460.243	1.45771	0.102542	8.44239e-20
LRRC59	2458.13	1.04168	0.0537294	8.95132e-20
ASXL2	2196.07	1.06003	0.0559158	9.47866e-20
RAB21	1208.92	1.24702	0.0780926	1.00959e-19
UBA6	2486.87	1.1145	0.0624696	1.07188e-19
GTF3C5	1455.39	1.14291	0.0658325	1.1349e-19
SSR2	3025.05	1.03112	0.0526704	1.2003e-19
SLC25A36	3091.56	1.10885	0.0619104	1.27084e-19
ASXL1	4751.5	0.986757	0.0475506	1.34908e-19
BLOC1S6	1566.6	1.15641	0.0676491	1.42907e-19
ARL8B	1098.65	1.3736	0.0933987	1.51133e-19
TMEM189	692.083	1.30081	0.0848697	1.6825e-19
CNOT4	808.961	1.27282	0.0816318	1.77778e-19
EBP	502.822	1.41431	0.098448	1.87479e-19
SREBF2	5310.53	0.958444	0.0445408	2.11426e-19
UBTD1	195.262	1.95271	0.163161	2.25228e-19
PPP1R18	597.049	1.33339	0.0894469	2.40977e-19
DDRGK1	908.703	1.21633	0.0755321	2.57874e-19
STX4	543.175	1.41694	0.0997042	2.76962e-19
UBXN7	2481.1	1.03792	0.0544159	2.99648e-19
IRF6	2365.42	1.15299	0.068259	3.22796e-19
CD59	4328.21	1.1533	0.0685731	3.53533e-19
NFE2L1	6950.62	0.970987	0.0465838	3.84581e-19
ABI1	2065.89	1.11286	0.0637374	4.16728e-19
SUPT7L	1436.63	1.10205	0.0625095	4.85321e-19
SLC3A2	11782.9	1.16027	0.0696169	5.228e-19
WDR74	813.851	1.22807	0.0779343	5.64201e-19
DDA1	670.338	1.27336	0.0834442	6.06307e-19
NAP1L1	11909.7	0.98516	0.0486122	6.55002e-19
ZC3H3	467.425	1.42684	0.102293	7.04628e-19
FAM53C	1592.08	1.14397	0.0680764	8.68548e-19
ZNHIT6	354.536	-1.53788	0.115526	9.27265e-19
NUDT16	593.289	-1.38031	0.0968709	1.10304e-18
GOLIM4	666.403	-1.31824	0.0887294	1.16151e-18
ITGA2	2104.87	-1.08539	0.0612278	1.21992e-18
TRIM15	175.183	-2.08022	0.182375	1.27826e-18
FYN	568.651	-1.36262	0.0949678	1.33654e-18
COL27A1	750.153	-1.3636	0.0948634	1.39476e-18
DENR	1463.02	-1.12914	0.0657937	1.56905e-18
TGM2	2261.96	-1.04603	0.0558923	1.8583e-18
THAP5	885.792	1.28451	0.0852172	1.97383e-18
RPS5	18224.2	1.10644	0.06356	2.03389e-18
WASF2	6076.05	0.98082	0.0483203	2.10037e-18
CLIC1	10712	1.01904	0.0529873	2.16688e-18
GSN	3773.62	1.0064	0.0514904	2.30735e-18
TFPI	2615.85	1.08519	0.0612048	2.45946e-18
SESN2	2923.53	1.0662	0.0588834	2.53742e-18
DNM2	5982.66	0.946457	0.044258	2.61855e-18
EPHX1	1299.26	1.17983	0.0728822	2.70363e-18
PLAUR	1162.73	1.29729	0.0872962	2.79024e-18
VPS37B	1408.74	1.1171	0.0653267	2.88756e-18
CCDC58	738.536	1.29566	0.0873011	2.98903e-18
SRRM1	2123.84	1.184	0.0736191	3.09368e-18
NCOA4	4680.67	0.970186	0.0473767	3.2035e-18
PIGV	343.648	-1.54026	0.117612	3.31807e-18
TAF9	1013.77	-1.20932	0.076935	3.66108e-18
NABP2	362.681	-1.60194	0.12525	3.77518e-18
RASL11A	142.983	-2.17042	0.194953	3.88916e-18
HOXB5	499.331	-1.49088	0.111316	4.00302e-18
SLC16A5	572.938	-1.35092	0.0941898	4.11676e-18
ATP6V1F	966.926	1.18865	0.0743521	4.46377e-18
RRBP1	4039.16	1.03369	0.0553317	4.71715e-18
FOXN3	528.555	1.40354	0.100945	4.84732e-18
ARL5B	1802.28	1.30304	0.0887943	5.13732e-18
NAB1	587.74	-1.35307	0.0951597	5.30758e-18
NHSL1	718.317	-1.31767	0.0906198	5.81732e-18
ADCK2	203.561	-1.83835	0.154945	5.98688e-18
C8orf82	180.416	-1.94304	0.167957	6.15626e-18
ODF2	688.966	-1.30983	0.0895951	6.32547e-18
CENPV	262.027	-1.68777	0.136335	6.4945e-18
FLOT2	1376.33	-1.13776	0.0685893	6.66336e-18
ZNF267	468.159	1.48787	0.111927	7.18928e-18
VAPA	5748.61	0.994746	0.0508607	7.38735e-18
FNTA	866.832	1.188	0.07487	7.58932e-18
PHRF1	1596.13	1.16739	0.0723551	7.79946e-18
RACGAP1	1389.42	-1.1384	0.0688694	8.24878e-18
SPATA20	476.983	-1.41491	0.103301	8.4731e-18
KIF4A	1433.98	-1.11856	0.0663877	8.92103e-18
IP6K1	682.534	1.28121	0.0866304	9.15298e-18
ZNF331	522.23	1.36191	0.0967353	9.63087e-18
INTS10	577.468	1.29908	0.0889839	9.88599e-18
LAPTM4A	2907.49	1.05598	0.0587683	1.04264e-17
ABI2	1131.64	-1.16816	0.0728487	1.07055e-17
NECTIN3	389.981	-1.48537	0.112512	1.09842e-17
CFAP97	893.433	-1.26461	0.0848274	1.12627e-17
MTRES1	125.499	-2.21254	0.203001	1.15409e-17
AAK1	1290.31	1.11986	0.0668306	1.18433e-17
IBTK	2852.54	1.04674	0.0576975	1.21462e-17
MRTO4	761.64	-1.25996	0.0844222	1.24802e-17
WDR37	504.101	1.3492	0.095691	1.4828e-17
DST	8428.5	1.00326	0.0523885	1.51793e-17
ZDHHC18	1043.37	1.17237	0.0736729	1.55647e-17
PSMG1	397.501	-1.46034	0.109759	1.67245e-17
RBM6	1546.57	1.11456	0.0664598	1.71227e-17
AAMP	2772.12	1.03597	0.0566864	1.75641e-17
NDE1	528.185	-1.36969	0.0986327	1.80054e-17
CUTC	303.392	1.60521	0.128328	1.84676e-17
CDKN1A	3031.42	1.83157	0.156842	1.89373e-17
PPP2R2D	845.819	1.20706	0.0783484	2.04293e-17
NARS2	301.482	-1.59582	0.127553	2.20797e-17
STRN3	748.895	1.21561	0.0796022	2.2656e-17
MACROH2A1	6590.66	0.953455	0.0465872	2.38987e-17
RHBDF1	3509.94	0.999355	0.0523917	2.45376e-17
PCED1A	276.208	-1.66073	0.136132	2.6511e-17
AP3S2	782.634	1.22201	0.0808054	2.80642e-17
GTF2B	823.665	1.24002	0.0831107	2.88607e-17
USP15	1370.57	1.13938	0.0703598	2.96696e-17
CRTC2	898.107	1.20045	0.0781195	3.04842e-17
RPS11	39715.5	0.905777	0.0407366	3.37757e-17
ARIH1	3030.73	1.00329	0.0531403	3.46313e-17
PROSER3	271.202	-1.74639	0.147514	3.72425e-17
LYAR	357.575	-1.54172	0.1217	3.81667e-17
PARPBP	286.492	-1.61741	0.131317	3.90899e-17
DNPH1	171.977	-1.9178	0.169605	4.10443e-17
ARSJ	747.149	-1.22355	0.0813733	4.31051e-17
MT-CO1	289457	1.02778	0.0564285	4.41414e-17
HES1	456.252	-1.42165	0.106711	4.52247e-17
ADAT1	284.183	-1.64348	0.135064	4.86336e-17
DNAJC5	4269.7	0.979971	0.0504122	4.97686e-17
RAB5B	3243.89	0.999595	0.0529659	5.21586e-17
TTPAL	498.302	-1.42009	0.106705	5.33994e-17
GTSE1	357.113	-1.50757	0.118134	5.61523e-17
CALR	5487.61	1.02428	0.0563102	5.90733e-17
IGF2BP3	1299.4	-1.11129	0.0675759	6.38148e-17
MRPL15	532.977	-1.41209	0.106174	6.54288e-17
SLC52A3	202.269	-1.8311	0.160051	7.20334e-17
COPA	6345.78	0.936411	0.0451373	7.36994e-17
PLBD2	834.194	1.24472	0.0847583	7.53946e-17
PPP2CA	3099.35	0.999767	0.0534433	8.68294e-17
GUCD1	1556.32	1.08824	0.06485	9.08881e-17
CCDC127	689.041	1.24316	0.0848795	9.30187e-17
H1-10	416.208	-1.51826	0.120359	9.72793e-17
C2CD5	1080.52	-1.16405	0.0747358	1.01749e-16
SLC35E1	775.389	1.21659	0.0815511	1.04033e-16
BCAR1	2300.28	1.09158	0.0654244	1.06346e-16
ACAD9	710.767	-1.2338	0.0838046	1.08682e-16
DHX33	423.591	-1.41854	0.107692	1.11069e-16
TMEM161A	406.492	1.4456	0.111239	1.13503e-16
STRN4	3696.05	0.996033	0.0531401	1.15959e-16
GLB1	1464.86	1.06561	0.0621777	1.18521e-16
DFFA	586.212	-1.36014	0.100318	1.23762e-16
MARS2	181.969	-1.95021	0.176758	1.31739e-16
MAN2B1	414.549	1.49735	0.118149	1.34452e-16
HELLS	507.566	-1.35469	0.0997272	1.4004e-16
TSC22D3	1569.64	-1.20244	0.0800374	1.45725e-16
DAGLB	553.64	1.27852	0.0899726	1.48741e-16
BRIX1	686.389	-1.3347	0.0973673	1.61303e-16
SKP2	491.85	-1.53863	0.123832	1.64502e-16
ZZEF1	1346.09	1.08078	0.0645498	1.78613e-16
SERTAD3	664.273	1.22992	0.0839974	1.86136e-16
GADD45B	175.775	1.86918	0.167254	1.89937e-16
BCL2L1	2833.59	-1.07913	0.0645446	2.10609e-16
CTDSP1	1331.15	-1.11469	0.0692133	2.15207e-16
ROM1	138.72	1.99966	0.184867	2.19841e-16
BNIP1	417.347	1.41264	0.108168	2.24497e-16
DHDDS	817.292	1.18167	0.0779926	2.29186e-16
SPC25	206.316	-1.7697	0.154933	2.38821e-16
ZNF614	379.413	-1.44846	0.112971	2.48651e-16
BIRC3	386.741	1.65121	0.139564	2.53741e-16
STT3A	6840.54	0.909317	0.0424742	2.69184e-16
TRMT61A	192.94	-1.80923	0.160388	2.74524e-16
CHPT1	363.533	-1.50615	0.120776	2.91097e-16
EIF4H	4976.12	0.941786	0.0468281	2.97019e-16
ZNF623	533.514	-1.30775	0.0949678	3.03392e-16
UBE2L3	1446.51	1.06119	0.0625797	3.09789e-16
MYADM	900.853	-1.21919	0.0833502	3.16203e-16
PDIA3	10879.4	0.94608	0.0474693	3.22715e-16
SIKE1	1195.83	1.1817	0.0784599	3.29309e-16
UBOX5	303.049	1.52668	0.123833	3.35947e-16
C5orf24	636.963	-1.30176	0.094267	3.42601e-16
ACSL3	7108.16	0.963127	0.0497436	3.49357e-16
SUCO	2966.77	0.975559	0.0515243	3.78762e-16
H6PD	694.43	-1.25131	0.0879066	3.86746e-16
RPIA	384.076	-1.51747	0.123013	3.94722e-16
MARCHF5	791.558	1.30127	0.0945867	4.03176e-16
MNX1	321.159	-1.49742	0.120593	4.12083e-16
SELENOI	2839.82	1.00251	0.0551929	4.21052e-16
UTP6	1383.68	-1.10395	0.0686076	4.30048e-16
ECM1	155.082	1.83846	0.165801	4.48445e-16
G3BP2	5415.8	0.986143	0.0530782	4.57883e-16
RCCD1	332.994	-1.53459	0.125689	4.67526e-16
CMSS1	394.906	-1.40491	0.108536	4.77212e-16
TRIP13	854.229	-1.1795	0.0787315	4.87151e-16
APEH	1044.84	-1.15887	0.076019	4.97238e-16
ARFGEF3	2255.01	1.00234	0.0552886	5.07334e-16
MRPL32	1108.03	1.1106	0.0696359	5.17484e-16
MEGF8	674.895	-1.27866	0.0919167	5.27751e-16
SGK1	469.737	-1.35956	0.102679	5.38218e-16
SMARCD2	1247.37	-1.18438	0.0794691	5.4878e-16
PLAG1	546.397	1.35209	0.101903	5.83223e-16
IP6K2	1465.25	1.0515	0.0619749	5.95066e-16
VGLL4	458.308	1.3233	0.0981777	6.19773e-16
TBCD	976.584	-1.15988	0.0764969	6.45581e-16
DNAJC25	237.26	1.67628	0.145282	6.58947e-16
B4GALT2	386.937	-1.43024	0.112645	7.00363e-16
NOL6	505.999	-1.31984	0.0979854	7.14991e-16
RFC2	522.852	-1.31495	0.0973824	7.3002e-16
NUP62CL	391.514	-1.42229	0.111731	7.45295e-16
NFIB	646.016	-1.24068	0.0875086	7.60659e-16
SERPINE2	586.701	1.25219	0.0891133	7.76703e-16
NUDT4	2029.28	-1.15047	0.0755809	7.93385e-16
ZNF678	490.016	1.33685	0.100533	8.10472e-16
LRRC37B	324.206	1.44919	0.115562	8.2762e-16
CCT3	7151.23	0.917966	0.044547	8.45177e-16
SAP130	898.465	1.1894	0.0810406	9.21793e-16
SYNJ2	1231.29	1.09021	0.0677716	9.42242e-16
PLPP6	152.951	-1.98743	0.188232	9.63369e-16
EPOP	200.735	-1.75348	0.156836	9.84528e-16
CCNL1	3469.22	1.00971	0.0570174	1.00582e-15
SRSF9	1453.53	1.07138	0.0653313	1.04908e-15
KDM1A	3222.77	1.03684	0.0607955	1.09733e-15
TMEM129	520.62	-1.33209	0.100536	1.12171e-15
FAM114A1	475.953	1.32996	0.100255	1.14613e-15
KIF14	638.574	-1.25281	0.08988	1.17062e-15
HLCS	456.722	-1.35324	0.103477	1.19622e-15
CAMKK2	449.261	-1.34824	0.102809	1.22189e-15
ZNF460	219.91	1.62993	0.140764	1.24769e-15
CREB3	900.422	1.13415	0.0739813	1.27349e-15
MON1B	1274.63	1.0942	0.0686615	1.32749e-15
AP5B1	688.199	1.19172	0.0818131	1.35462e-15
FANCL	342.994	-1.46478	0.118736	1.41093e-15
RAVER2	723.244	-1.25143	0.0899957	1.44035e-15
NBAS	1539.25	1.03797	0.061215	1.50043e-15
NIPAL3	1607.3	1.0295	0.0600697	1.53099e-15
DCAF8	1095.99	1.10757	0.0706217	1.56158e-15
MBD1	956.721	1.12926	0.0736402	1.62657e-15
BACE2	714.944	1.23294	0.0877589	1.66118e-15
HMMR	1036.35	-1.18933	0.0819844	1.77066e-15
RPL13A	56174.2	0.8914	0.0416002	1.84865e-15
CENPM	186.908	-1.83512	0.169785	1.88892e-15
WNT10A	144.964	-1.95339	0.185932	1.93018e-15
SLC5A6	371.103	-1.41998	0.11346	1.9715e-15
NDUFAB1	1673.41	1.07903	0.0671335	2.01282e-15
MTF1	1141.55	1.11254	0.0717889	2.05751e-15
RPL3	36128.6	0.941886	0.048574	2.14739e-15
ATP2A2	7380.38	0.903244	0.0434281	2.29712e-15
PLEKHJ1	724.761	-1.21695	0.0864833	2.526e-15
TTF2	508.992	-1.33577	0.102754	2.58708e-15
TP53INP2	433.761	1.32974	0.101961	2.71096e-15
MEIS2	598.948	-1.27459	0.094423	2.77339e-15
TRIM16	281.256	1.61928	0.141626	2.83593e-15
SP100	1821.29	1.24022	0.0897741	2.96494e-15
MRPL16	464.204	-1.32911	0.10201	3.09738e-15
TRIM65	295.783	-1.51704	0.127804	3.16464e-15
PPP1R15B	3953	0.999952	0.0569805	3.23714e-15
CEP85	1099.35	1.14518	0.07703	3.3907e-15
ZNF622	826.517	1.15575	0.0784984	3.4697e-15
LRRC58	1685.18	1.18023	0.0819002	3.62937e-15
RRS1	181.544	-1.77634	0.163969	3.71148e-15
LYPLAL1	213.745	-1.7183	0.156039	3.87732e-15
SMC6	836.75	-1.20707	0.0856629	3.9614e-15
MYEF2	649.252	-1.22674	0.088377	4.04571e-15
BZW1	2615.21	1.02843	0.0610784	4.13069e-15
ARHGAP19	499.064	1.27263	0.0948561	4.22295e-15
HSP90B1	14291.6	0.934099	0.0481621	4.31544e-15
SPRY1	436.212	-1.32926	0.10276	4.50453e-15
IRF2BP1	328.575	-1.44773	0.119158	4.70017e-15
CDC40	886.291	1.13333	0.0757696	4.99866e-15
IMPACT	230.916	-1.63132	0.14463	5.10102e-15
BRD4	1501.88	1.08972	0.0697695	5.20333e-15
PKIB	618.416	1.23262	0.0895868	5.30972e-15
TRIM37	1077.53	1.08535	0.0692191	5.41634e-15
MAX	709.856	1.18318	0.082765	5.52377e-15
C5orf51	1274.32	1.27637	0.0956874	5.63285e-15
NEDD4	946.533	-1.26827	0.0946162	5.85551e-15
UCK2	610.87	-1.22912	0.0891963	5.96753e-15
ABHD14B	528.838	-1.29307	0.0981611	6.43293e-15
API5	3938.29	0.962279	0.0523176	6.67272e-15
ENOSF1	1179.95	-1.11192	0.0731508	6.80026e-15
VPS36	1110.62	-1.14261	0.0774128	6.92784e-15
C11orf95	430.236	-1.36065	0.107689	7.0558e-15
TIPIN	131.339	-2.01595	0.198968	7.32592e-15
ATF4	9589.63	0.894621	0.0430762	7.46817e-15
PARVA	1354.3	-1.06063	0.0662536	7.7694e-15
CDCP1	1194.63	1.10514	0.0724567	7.92164e-15
SLC44A5	491.711	-1.29567	0.0990748	8.0804e-15
ARFGEF2	4524.99	0.91988	0.0467681	8.58489e-15
ANO6	3388.21	0.932254	0.0485542	9.29905e-15
ZNF212	552.011	1.27842	0.0969663	9.48473e-15
NEIL3	147.178	-1.86924	0.179668	9.6751e-15
AIMP2	266.278	-1.56449	0.137101	1.00608e-14
EIF2AK4	520.497	-1.26317	0.0950745	1.06655e-14
E2F3	927.011	1.10989	0.0736067	1.08797e-14
ANKRD17	4604.18	0.920646	0.0470791	1.13096e-14
KNL1	1489.75	-1.10931	0.0736137	1.15372e-14
TMEM11	434.36	1.29916	0.100307	1.20005e-14
BICDL2	476.948	-1.3088	0.10168	1.24674e-14
BACH1	2523.8	1.06218	0.0671103	1.31927e-14
COQ5	325.169	-1.47354	0.124996	1.34436e-14
KMT2E	3067.47	0.952771	0.051747	1.36963e-14
ZWINT	1125	-1.17172	0.0826787	1.47477e-14
NIP7	402.571	-1.34931	0.107726	1.50236e-14
LMNA	10017.8	0.876522	0.0411525	1.61665e-14
SLC25A44	888.149	1.12096	0.0756589	1.64642e-14
DEGS2	220.269	-1.61981	0.146143	1.67694e-14
CTSB	2043.01	0.981054	0.0559945	1.77197e-14
RAE1	1791.56	1.00374	0.0592123	1.83658e-14
ZC3HAV1	2120.41	1.1827	0.0847672	1.98162e-14
ATP2C1	3173.11	0.986953	0.057025	2.01981e-14
D2HGDH	243.652	-1.57501	0.140594	2.06013e-14
LENG9	139.978	-1.90093	0.186891	2.10057e-14
ZMYND11	1001.43	-1.14245	0.0791809	2.14119e-14
STK35	1603.25	1.01146	0.0605769	2.1818e-14
VPS51	1774.27	1.03791	0.0643388	2.22251e-14
RTL10	1225.32	-1.07528	0.0696475	2.26323e-14
FBXO34	812.098	1.14992	0.0803554	2.34982e-14
KLF12	513.628	-1.2627	0.0964048	2.39347e-14
SSX2IP	422.793	-1.31721	0.104204	2.48172e-14
QRICH1	1358.56	1.04465	0.065419	2.52632e-14
MSI2	1802.54	-1.02877	0.0631834	2.57179e-14
RANBP6	969.368	1.11696	0.0757732	2.61828e-14
RRP12	1356.53	1.14258	0.0794295	2.66495e-14
CDK11B	771.381	1.15157	0.0807146	2.75841e-14
ZNF48	200.964	-1.81901	0.175859	2.85271e-14
HERC2	3248.25	0.935023	0.0499512	2.95111e-14
PHF3	3634.85	0.966017	0.0543916	3.00271e-14
PAN3	2753.99	0.964725	0.0542091	3.05436e-14
SECISBP2L	1337.14	1.08472	0.0713648	3.10699e-14
LRIG1	467.585	-1.33324	0.106863	3.15983e-14
SAT2	138.737	1.84978	0.180637	3.21271e-14
ZRSR2	289.463	1.46619	0.125911	3.31966e-14
GEMIN4	251.983	-1.5399	0.136447	3.37373e-14
OIP5	119.525	-2.06961	0.212249	3.48387e-14
NIPBL	4824.65	0.929365	0.0492402	3.53949e-14
ZNF277	1113.46	1.07222	0.0697144	3.71052e-14
GEMIN5	289.494	-1.46812	0.126378	3.7685e-14
AZI2	455.409	1.29785	0.10204	3.88562e-14
CYLD	685.496	1.20813	0.0892291	3.94529e-14
ZNF45	302.786	-1.44211	0.122887	4.00891e-14
CBR4	274.033	-1.53223	0.135872	4.20156e-14
ACVR1	1013.49	1.0903	0.0725177	4.33301e-14
ETV4	895.283	-1.16944	0.0839325	4.46838e-14
COPB2	5382.16	0.904333	0.0458994	4.53992e-14
PTTG1	1031.53	-1.08757	0.072285	4.68696e-14
MXD4	1370.94	1.12763	0.0780614	4.76166e-14
RPS18	25990.8	0.912575	0.0471812	4.91621e-14
CTSA	1706.11	1.03986	0.0655269	4.99614e-14
CEP170B	2794.67	1.05247	0.0675206	5.4335e-14
SNW1	1428.34	1.01514	0.0621608	5.52662e-14
PEX10	179.782	-1.74412	0.16756	5.62132e-14
RAB35	1663.59	1.00762	0.0611173	5.71756e-14
TRIM29	1630.84	-1.03988	0.0658246	6.01236e-14
MRPL24	316.878	-1.47735	0.129427	6.12364e-14
PRSS3	452.959	1.27205	0.0996902	6.23705e-14
ADAL	294.252	-1.46884	0.128352	6.47182e-14
MAPK8	1477.45	1.03374	0.0652543	6.84039e-14
DENND5A	677.645	1.20707	0.0905313	6.97113e-14
HSPA9	16169.1	1.01504	0.0626025	7.10337e-14
SLC25A12	316.425	-1.40862	0.119894	7.2356e-14
TBC1D22B	591.071	1.24009	0.095505	8.05924e-14
LTV1	197.168	-1.68032	0.159798	8.35033e-14
EXOSC5	380.86	-1.38157	0.116326	8.65276e-14
OAZ1	6101.05	0.921627	0.0491749	8.96151e-14
RPS14	12053.5	0.909818	0.047478	9.12095e-14
DUSP5	1126.46	2.47853	0.27702	9.77696e-14
RCC2	3112.11	-1.00301	0.0611695	9.94498e-14
ARHGEF26	240.816	-1.55491	0.141979	1.01161e-13
PRPS1	1046.61	1.06909	0.0708834	1.02892e-13
SPATA2	530.373	1.2148	0.0922345	1.06368e-13
SPTLC1	2178.96	0.971831	0.0568347	1.16259e-13
AGPS	1165.1	-1.09555	0.0750648	1.20447e-13
COBLL1	1156.39	-1.07231	0.0716653	1.26774e-13
THAP3	302.302	1.46532	0.129474	1.28901e-13
POLR2C	2054.07	1.02177	0.0643352	1.37742e-13
HACL1	683.596	1.16196	0.0850052	1.40043e-13
BCCIP	1356.49	1.01761	0.063745	1.42352e-13
CCNG2	1400.39	1.13938	0.0819622	1.57547e-13
CLIP1	3046.91	0.968735	0.0567567	1.60298e-13
RABGGTB	2147.2	0.99524	0.0607083	1.63115e-13
SERINC2	1697.6	1.01737	0.064018	1.66004e-13
GOLGB1	10221.7	0.900362	0.0467227	1.74848e-13
MFSD3	114.597	-2.06055	0.218894	1.84013e-13
MMP15	670.569	-1.22242	0.094713	1.87417e-13
HNMT	514.163	-1.23453	0.0965167	1.90825e-13
EXOSC9	356.636	-1.38729	0.119244	1.97683e-13
ZFP62	852.717	-1.12201	0.0798559	2.04697e-13
MALT1	585.455	1.1715	0.0872382	2.11801e-13
DHX37	361.27	-1.34216	0.112644	2.15389e-13
NAT14	193.647	-1.65246	0.158837	2.19006e-13
EML4	4965.77	-0.905536	0.0477411	2.22773e-13
DYRK1B	633.692	1.28822	0.104814	2.30489e-13
TNS3	914.458	-1.1218	0.0800637	2.34512e-13
ALG8	606.274	-1.17614	0.0881684	2.38532e-13
STARD3NL	878.164	1.10101	0.0770141	2.42675e-13
SRM	197.885	-1.60996	0.152995	2.50997e-13
LANCL1	456.91	-1.2872	0.104986	2.55485e-13
PPP2CB	847.559	1.12097	0.0802469	2.74152e-13
PSENEN	724.526	1.17026	0.0877125	2.98716e-13
OTUD7B	952.79	1.08991	0.0757658	3.19288e-13
HDLBP	15782	0.841694	0.0385702	3.41124e-13
NRBP1	2279.82	0.970398	0.0579231	3.46756e-13
WDR33	1853.36	0.97056	0.0579531	3.52409e-13
CHDH	343.17	-1.40311	0.122979	3.5809e-13
BBS10	182.146	-1.69033	0.166186	3.63824e-13
CCNY	1837.19	0.99385	0.061551	3.81532e-13
NIFK	491.834	-1.28268	0.105129	3.8786e-13
CRYBG1	2203.86	-0.958252	0.0562767	4.07089e-13
HEXA	1070.22	1.10721	0.0787999	4.20423e-13
CTPS2	296.075	-1.43728	0.128674	4.4092e-13
SH2D4A	709.601	-1.18319	0.0903886	4.48056e-13
CCDC14	2436.49	-0.976414	0.0591634	4.55281e-13
CHMP4B	4861.69	0.884948	0.0453638	4.69953e-13
CAMLG	880.9	1.11411	0.0800744	4.77588e-13
TMEM38B	324.936	1.39054	0.121916	4.85244e-13
UMAD1	205.001	1.57195	0.149372	4.92899e-13
MGRN1	1207.76	1.02229	0.0662073	5.00658e-13
SLC7A11	10028.3	0.962075	0.0571113	5.16314e-13
IL6ST	2957.34	0.979597	0.0598852	5.24938e-13
GRB14	301.307	-1.41314	0.125687	5.33593e-13
FBXL20	537.503	1.18711	0.0913902	5.42265e-13
CTR9	2113.59	0.984616	0.060706	5.60183e-13
PHGR1	262.575	-1.50262	0.139419	5.6925e-13
ZNF572	215.999	-1.55076	0.146813	5.78533e-13
PERP	4424.13	0.89496	0.0471267	5.8784e-13
SFXN4	295.146	-1.42936	0.128443	5.97392e-13
ESPL1	670.868	-1.19401	0.0926567	6.06999e-13
ABHD10	526.747	-1.2798	0.105923	6.57175e-13
CHMP5	1549.16	1.00784	0.0645293	6.6814e-13
ISL1	131.399	-1.83352	0.190667	6.79464e-13
CMPK1	3745.11	1.02048	0.066536	6.91e-13
KANSL1	1867.81	0.989272	0.0618414	7.3852e-13
COQ3	130.277	-1.8245	0.189807	7.76371e-13
FBXO33	326.984	1.35568	0.118037	7.89166e-13
CHCHD3	1850.35	0.969954	0.0589913	8.02239e-13
VPS37A	395.646	1.27967	0.106485	8.15506e-13
MTHFD1	864.073	-1.13331	0.0840582	8.28814e-13
TWF2	535.924	1.18177	0.0915559	8.42562e-13
C2orf68	684.312	-1.13568	0.0845156	8.70405e-13
ZDHHC23	558.154	-1.20514	0.0952229	8.84659e-13
CBR1	465.478	1.2396	0.100537	8.99043e-13
RRP7A	274.677	-1.46543	0.135242	9.13525e-13
RAD9A	306.741	1.38572	0.123028	9.28154e-13
MECR	222.776	-1.52986	0.145314	9.58634e-13
ABT1	475.662	1.24912	0.102149	9.73925e-13
RPLP1	24298.8	0.89079	0.0470441	9.89311e-13
DDR1	2945.4	0.933662	0.0536789	1.03663e-12
LPIN3	486.878	1.27549	0.106323	1.05264e-12
FAM160A2	2080.32	0.951801	0.0565038	1.10114e-12
NFX1	1456.6	1.02054	0.0671684	1.13471e-12
ARID4B	1712.02	0.985134	0.061725	1.1691e-12
PAIP2	1314.82	1.01434	0.0662298	1.1863e-12
TBC1D10B	1121.55	1.04504	0.0709825	1.22085e-12
SGK2	739.241	1.14446	0.0863824	1.23874e-12
ADIPOR1	2773.39	0.940104	0.0548546	1.25695e-12
VDAC3	715.137	1.14399	0.0863503	1.27518e-12
COA7	481.045	-1.26126	0.104472	1.29346e-12
ADO	321.011	-1.40818	0.127316	1.31269e-12
CIT	819.218	-1.17704	0.0916626	1.37251e-12
NOP56	1814.07	-0.990171	0.0627711	1.3931e-12
ATP6AP1	2541.34	0.93988	0.0549975	1.41396e-12
LIF	643.853	1.17131	0.0908864	1.43508e-12
APLP2	9434.26	0.857708	0.0423286	1.47855e-12
TOM1L2	540.182	1.1909	0.0940968	1.50138e-12
HAUS5	319.83	-1.42406	0.130483	1.54901e-12
CCDC12	448.447	1.22669	0.0998355	1.57365e-12
COPG2	708.134	-1.15374	0.0884894	1.59832e-12
PIP4K2B	1385.22	-1.01534	0.0669786	1.64813e-12
DNAJC12	312.756	1.40096	0.127183	1.75156e-12
CRYBG2	748.784	1.11934	0.08331	1.80511e-12
ETNK1	1764.47	1.10892	0.0817516	1.85981e-12
NFIC	980.982	1.22903	0.100582	1.94552e-12
DHX32	1506.94	1.03792	0.0708659	1.97658e-12
SCARB1	1062.95	1.06411	0.0749965	2.00819e-12
COX6B1	3163.74	0.926611	0.0534907	2.04018e-12
EIF3G	1034.99	1.07115	0.0761989	2.07358e-12
BTAF1	3993.68	0.943648	0.0563262	2.17882e-12
TFE3	1723.41	1.04855	0.0728249	2.21557e-12
SLC2A4RG	896.832	-1.07858	0.0775615	2.25268e-12
DQX1	134.686	1.78181	0.188311	2.40456e-12
NDUFB4	1640.63	0.992663	0.064149	2.44371e-12
ARL15	190.482	-1.58698	0.157924	2.60593e-12
SEL1L	2270.98	0.974478	0.0614307	2.64897e-12
FZD7	342.189	1.29866	0.112706	2.78096e-12
HIPK1	2053.64	0.960999	0.0594407	2.87442e-12
CBLC	488.344	-1.20609	0.0982235	2.9224e-12
DUS1L	844.125	-1.07263	0.077153	2.97125e-12
PAQR4	162.267	-1.67461	0.172467	3.02098e-12
PRRG4	352.135	1.30481	0.113936	3.0707e-12
FBXO4	137.594	-1.74805	0.184219	3.17271e-12
SAR1B	901.751	1.11504	0.0840196	3.27667e-12
SUV39H2	191.22	-1.5846	0.158474	3.32961e-12
PDE7A	493.078	-1.19603	0.0969191	3.38353e-12
RTCB	1584.56	1.04131	0.0724649	3.49656e-12
TUBE1	652.161	-1.16241	0.0917186	3.55371e-12
HINT1	3265.99	0.944525	0.0571245	3.66856e-12
CWC22	1300.59	1.03528	0.0715869	3.72764e-12
TM7SF2	488.815	-1.24426	0.104884	3.78846e-12
TIAL1	2543.04	0.948527	0.0578605	3.85022e-12
SRSF4	1599.04	0.974569	0.062007	3.91202e-12
RIPOR1	673.787	1.10572	0.0830202	4.1041e-12
FKBP10	869.041	-1.09986	0.0821514	4.17234e-12
SLC26A6	741.784	1.12818	0.0867175	4.31163e-12
RBL1	310.38	-1.40916	0.132226	4.94162e-12
WDR34	757.351	-1.10147	0.0829417	5.02973e-12
RFC4	407.349	-1.27751	0.111316	5.38931e-12
HDAC3	1447.05	1.02331	0.0704721	5.57311e-12
DMAC1	302.142	-1.40509	0.131904	5.66654e-12
STEAP1	149.572	-1.77344	0.191163	5.76022e-12
ORC3	1033.99	1.02953	0.07151	5.85392e-12
TSPAN31	371.331	-1.30834	0.116396	5.94886e-12
IKBKG	166.085	1.57299	0.15909	6.04644e-12
ENTR1	855.969	-1.0777	0.0795001	6.2499e-12
CHCHD2	4269.65	0.988211	0.0651041	6.57214e-12
TICAM1	229.608	1.43921	0.137926	6.68058e-12
SELENBP1	319.749	-1.34967	0.12352	6.79075e-12
DYNLL1	3034.53	0.902028	0.0512229	6.90159e-12
PTOV1	1093.88	1.06579	0.0777031	7.23779e-12
SAFB	1663.04	0.99328	0.0660556	7.35456e-12
C20orf27	195.717	-1.55605	0.157098	7.47128e-12
DNTTIP1	906.818	1.05889	0.0766743	7.58815e-12
RHOQ	702.623	1.10799	0.0846477	7.70657e-12
PATL1	2607.52	0.969319	0.0622183	7.82596e-12
RPS19	27236.4	0.984541	0.0646922	8.06592e-12
FAM120AOS	703.408	-1.11611	0.0860423	8.18849e-12
SYF2	1474.6	1.02737	0.0716973	8.31313e-12
OAS1	2545.38	1.8939	0.212133	8.43777e-12
DVL3	1970.8	0.987114	0.0651956	8.5639e-12
RRP1B	434.401	-1.2591	0.109371	8.95273e-12
GRK6	526.949	-1.21454	0.102148	9.08261e-12
HPS6	148.89	-1.70627	0.182366	1.00396e-11
[truncated: 1,630 more rows]

## Sheet: HT-29, oxyquinoline
Gene	baseMean	log2FoldChange	lfcSE	svalue
ACSS2	3779.47	3.83851	0.0715539	0
ADAMTS6	733.642	-1.8842	0.0900763	0
AGMAT	314.381	-1.86898	0.125876	0
AJUBA	1954.16	-2.1142	0.0691388	0
AKR1C1	1404.78	4.73288	0.10331	0
ALDH1A1	7644.43	-1.02194	0.0422993	0
AMOTL2	1015.42	-1.46436	0.0743938	0
ANXA13	8306.57	-1.46451	0.0623645	0
AQP5	366.548	-2.69267	0.125594	0
ARHGAP23	4326.83	-1.06236	0.0536025	0
AURKA	1850.33	-1.27418	0.0630166	0
CCNB1	2550.19	-1.39787	0.0565661	0
CCNB2	2034.47	-1.13479	0.0571849	0
CDCA7	1891.56	-1.31669	0.0662904	0
CENPE	1745.22	-1.4592	0.0638045	0
CENPF	6020.36	-1.2858	0.0479439	0
CFTR	4910.56	-1.81993	0.0578974	0
CLDN1	1601.44	-1.37586	0.0686638	0
CLEC3A	1106.67	-2.49372	0.0932431	0
CNTRL	776.49	-1.46655	0.0797813	0
COL27A1	879.992	-1.34157	0.0874575	0
CXCR4	562.676	-2.39711	0.110869	0
DDC	214.788	-3.05861	0.173252	0
DEPDC1	793.287	-1.66687	0.0811017	0
DUSP6	1506.48	-1.86326	0.0815691	0
DYNLL1	1743.66	-1.27604	0.0658424	0
EDN1	265.037	-3.2739	0.160892	0
EGR1	1444.28	-4.85531	0.12224	0
ENC1	6443.41	-1.06609	0.0508738	0
EPHA2	3443.09	-1.32175	0.0639012	0
EPHB3	417.165	-1.64094	0.104794	0
ERN2	392.305	-1.86497	0.13358	0
F2R	1314.74	-2.05509	0.0788506	0
F5	3277.17	-1.04732	0.0541734	0
FAM13B	804.869	-1.53936	0.0794239	0
FOS	685.698	-1.7823	0.10849	0
FRAS1	3073.06	-1.52027	0.0572279	0
FUS	2424.32	-1.18315	0.0568882	0
GABRP	602.772	-1.66204	0.0954179	0
GPATCH4	618.852	-1.50021	0.0920636	0
HMGB3	933.92	-1.37026	0.0769949	0
HMGCS2	173.603	-2.22149	0.167598	0
HMMR	1124.06	-1.57855	0.0798512	0
HNMT	581.535	-1.39827	0.0918727	0
HNRNPM	2437.08	-1.10307	0.0542991	0
HNRNPU	9469.5	-0.971426	0.0434652	0
HS3ST1	544.227	-1.78987	0.0996473	0
ITGA2	2361.29	-1.27739	0.0648132	0
ITPR2	1426.32	-1.1808	0.0640354	0
KIF21B	976.171	-1.46012	0.0794946	0
KITLG	1466.74	-1.31378	0.0634066	0
LMO4	3027.12	-1.19728	0.0558185	0
LRRC31	302.412	-1.9291	0.129592	0
MBNL3	667.105	-1.52272	0.0900447	0
MECOM	1513.41	-1.50465	0.0665689	0
MRPL1	418.373	-1.54479	0.106483	0
MT1E	518.271	-1.80059	0.117794	0
MYC	2234.43	-1.11145	0.0584771	0
NCOA5	762.607	-1.9924	0.0877821	0
NIPAL1	521.965	-1.54507	0.105434	0
NMUR2	1559.23	-1.19603	0.0636804	0
NNMT	450.033	-1.69745	0.128401	0
NOX1	850.315	-4.68757	0.126463	0
ODC1	4633.08	-1.45864	0.065716	0
ORC5	553.528	-1.4371	0.0951585	0
PIGW	388.493	-1.54428	0.107647	0
PIK3R1	1910.16	-1.34088	0.063025	0
POLR1A	1114.95	-1.26539	0.0694247	0
PPFIBP2	611.939	-1.42027	0.0938006	0
PROM1	2203.55	-1.46033	0.0616304	0
PRR11	1390.86	-1.24698	0.0685415	0
RASL11A	167.132	-2.168	0.170396	0
REG4	408.206	-1.59943	0.108563	0
RGS2	944.92	-1.93523	0.0875512	0
ROR1	903.034	-1.54716	0.0791397	0
SFPQ	4921.5	-1.39738	0.0486126	0
SHH	1085.36	-1.33043	0.0825448	0
SLC12A2	10899.8	-1.50664	0.0487677	0
SLITRK6	1856.66	-1.86307	0.062727	0
SOX4	2340.82	-1.40771	0.0669522	0
SPAG1	546.77	-1.77027	0.0997003	0
SPDL1	642.551	-1.45998	0.0865349	0
SQSTM1	12771.4	2.7273	0.0474933	0
TFAM	1330.16	-1.18057	0.0652539	0
TMPO	3548.63	-1.07304	0.0519251	0
TNFSF15	1296.99	-1.36129	0.0679237	0
TNS4	1297.95	-1.24427	0.0705131	0
UBTF	1187.02	-1.54614	0.0769952	0
USP40	1126.79	-1.20084	0.0708497	0
UTP20	699.8	-1.39278	0.0867467	0
VIL1	2806.66	-1.14076	0.0533906	0
WDR35	474.501	-1.59961	0.100528	0
WNK4	462.458	-1.47218	0.100323	0
ZBED3	979.004	-1.51966	0.0811331	0
ZBED6CL	736.607	-1.51059	0.0832665	0
ADAM8	1968.99	2.88183	0.0646137	3.64312e-279
INSIG1	6357.73	3.04828	0.0719285	1.94949e-259
SDCBP2	1218.46	4.06304	0.102391	2.56183e-255
HMGCS1	8233.14	2.89465	0.0692357	2.0664e-246
AKR1B10	2145.06	2.84447	0.0721374	9.08155e-218
LSS	3040.66	2.31805	0.0567005	1.35855e-207
DHCR7	6087.3	2.16886	0.052587	1.03199e-201
OSGIN1	869.543	3.31891	0.0943285	4.05497e-187
ENO2	1773.41	2.93696	0.0828759	1.352e-179
MVD	1811.83	2.67522	0.0739248	2.72183e-178
GCLC	3731.06	2.34891	0.0625589	2.65123e-177
IGFBP6	1673.84	2.45307	0.0663515	1.03596e-176
ALDOC	1660.88	2.53922	0.0722492	1.43974e-163
TNFAIP2	3745.26	1.99593	0.0522961	1.05393e-162
TAP1	914.592	3.02449	0.0943612	8.07965e-150
CEACAM5	812.34	3.08408	0.0971214	1.9165e-148
ICAM1	627.225	3.54551	0.12202	1.71393e-132
PIM1	532.583	3.6626	0.128026	3.83329e-130
NEU1	2384.74	2.1	0.0630519	8.71491e-130
CEACAM6	1277	2.4238	0.0770857	3.2478e-128
IDI1	3484.97	2.13767	0.067691	6.66341e-119
IFIT2	1836.22	2.50448	0.0841989	1.73141e-117
NFKB2	1519.97	2.32912	0.0772944	3.26173e-115
APOL2	812.084	2.57273	0.088224	1.02193e-114
RELB	1017.21	2.67841	0.0938507	1.08957e-112
STARD4	1908.86	2.08015	0.067684	1.30513e-110
IFIH1	1912.06	2.38307	0.0822607	2.14305e-108
LAMC2	1648.24	2.3747	0.0829027	7.61062e-106
BHLHE40	909.677	2.67643	0.0977456	4.72739e-104
ITPKA	530.862	3.26977	0.126025	3.87176e-103
C6orf223	938.673	2.33784	0.0826036	2.38392e-102
IFIT3	1697.72	2.52259	0.0913219	4.47475e-102
GSN	6055.15	1.64523	0.0500221	7.7525e-102
MOB3C	900.513	2.45835	0.0891418	1.56466e-100
ME1	2137.42	1.82097	0.0598551	3.071e-97
TKT	12797.6	1.4699	0.0428943	7.60988e-97
PFKFB2	1526.36	1.89669	0.0638096	2.83214e-96
TSKU	2221.63	1.75073	0.0571094	4.25259e-95
ECM1	433.363	3.31798	0.134672	4.89603e-94
FTL	41862.5	1.41333	0.0412761	4.26002e-92
HSPA5	17153.7	1.93478	0.0675131	2.32719e-91
PER1	958.576	2.2083	0.0815658	2.41354e-90
LAMA3	2169.37	1.95491	0.0689826	5.12486e-90
ISG20	728.986	2.58994	0.101039	8.80377e-90
GPX2	13253.1	1.53096	0.0477715	1.70918e-89
SPNS2	2483.48	1.72663	0.0580526	1.39981e-88
APOL1	1175.74	2.22455	0.0835618	4.35457e-88
SEC24D	1934.15	1.78022	0.0616259	2.48317e-86
OPTN	2613.15	1.84996	0.0667065	9.75945e-83
BMF	494.567	2.58498	0.107058	1.99196e-80
RBCK1	7150.91	1.59083	0.0538447	3.98374e-80
FASN	7976.35	1.68463	0.0588899	6.25631e-80
NPC1	2623.93	2.06709	0.079612	1.27667e-79
SERINC2	2658.19	1.6091	0.0556164	2.93186e-78
GABARAPL1	1075.02	2.108	0.082858	8.03499e-78
ABHD4	554.459	2.43432	0.101372	1.1715e-76
SCD	37553.7	1.42214	0.0467913	3.7251e-74
IL32	268.349	3.59038	0.169034	3.10127e-73
ADAM19	866.652	2.10906	0.08652	1.07614e-71
TNIP1	4117.84	1.6696	0.0618677	3.24642e-71
LPIN1	938	2.2393	0.0943943	5.62359e-71
MLPH	3410.97	1.44643	0.0504004	4.43276e-68
IL1RN	560.009	2.26867	0.0992745	4.65993e-67
HDAC5	1802.15	1.62695	0.0615622	1.2171e-66
HLA-C	2590.93	1.59276	0.060299	2.8257e-65
SPAG9	4433.69	1.51535	0.0559122	1.19482e-64
P4HA1	3185.17	1.6715	0.0657281	6.81105e-64
SERPINE2	935.282	1.85195	0.0766957	1.35026e-63
CLIP2	724.966	2.11829	0.0928656	2.11186e-63
EPB41	3436.1	1.49622	0.0559915	4.00096e-62
MSMO1	3001.98	2.72856	0.133176	7.91917e-61
SLC25A22	1349.03	1.67461	0.0681517	4.57145e-60
PHF1	1176.28	1.75695	0.0733207	8.57109e-60
DDX60	1280.65	2.06615	0.0940633	1.85099e-58
QSOX1	4735.28	1.42641	0.0536912	7.5411e-58
WBP2	2235.3	1.47209	0.0567215	1.68737e-57
HMGA1	17891.2	1.35001	0.0490995	4.0131e-57
MANF	1061.89	1.79656	0.0780729	1.37633e-56
G6PD	3400.56	1.43058	0.0545799	2.28266e-56
SLC6A6	1981.21	1.66777	0.0699299	3.3169e-56
VAT1	2331.45	1.47998	0.0579873	5.54652e-56
TMPRSS4	3298.47	1.45197	0.0565914	1.85687e-55
LHFPL2	1232.46	1.66914	0.0707887	3.24497e-55
SYT7	1644.13	1.65148	0.0702144	2.00739e-54
CEACAM7	277.118	2.76203	0.143581	3.4241e-54
HYOU1	7205.51	1.30537	0.0475204	4.88672e-54
WIPI1	533.244	2.17706	0.105829	2.01556e-53
PDP2	752.188	1.86137	0.0852178	4.29144e-53
ACSL1	2067.99	1.43509	0.0567699	6.65835e-53
ZC3HAV1	2902.11	1.50166	0.0614808	1.29007e-52
CHPF	925.903	1.75793	0.0787208	2.00909e-52
IFIT5	791.002	1.93874	0.0910934	3.29278e-52
FDPS	2313.05	1.58815	0.0681923	2.3879e-51
HSD17B7	405.049	2.37628	0.123711	3.75671e-50
TP53INP2	748.18	2.06268	0.102529	1.3017e-49
MVK	761	1.80163	0.0847031	4.46371e-49
PDIA4	7761.21	1.28629	0.0488636	6.62457e-49
CALB2	1552.08	1.57461	0.0692181	1.88476e-48
SMIM29	328.333	2.40198	0.12718	2.42912e-48
KLK10	1684.06	1.63358	0.0734595	3.07348e-48
FNIP1	1109.44	1.60045	0.0713336	4.20142e-48
FEM1C	1866.87	1.66048	0.076081	8.85945e-48
TAGLN2	12926.1	1.28216	0.0493878	1.4974e-47
NAMPT	2482.5	1.54213	0.0680319	2.69116e-47
TIMP2	847.849	1.67816	0.0777021	3.88165e-47
TAPBP	2506.09	1.50232	0.065613	7.98259e-47
LRP8	3363.37	1.65012	0.0771865	5.96401e-46
TMEM41B	1668.64	1.45276	0.0630881	1.54712e-45
HLA-B	637.855	1.91724	0.0970667	4.16637e-45
SLC17A5	902.509	1.63964	0.0769448	5.98913e-45
TBC1D17	2006.32	1.41161	0.0605366	9.68857e-45
NECTIN4	429.916	2.10907	0.111696	1.3914e-44
P4HA2	2472.12	2.41436	0.134103	1.83096e-44
ATP2B4	2090.67	1.73759	0.0845167	2.29106e-44
TRIM31	3644.04	1.35644	0.0566089	3.30562e-44
FADS3	676.032	1.78737	0.0882321	3.82318e-44
GNPDA1	1839.41	1.45649	0.0640507	4.51309e-44
NDRG1	10168.2	2.81287	0.164491	6.14453e-44
ACAT2	1720.5	1.57887	0.0738144	1.09401e-43
LRP1	7056.48	1.27567	0.0517783	5.8306e-43
PML	939.727	1.7484	0.0882687	4.23323e-42
KLHL24	1560.38	1.52762	0.0717438	7.90758e-42
PROX1	637.062	1.80171	0.093017	1.58071e-41
BAIAP3	616.838	1.88982	0.0999625	3.60895e-41
SH3BGRL3	3635.72	1.35643	0.0591969	5.08079e-41
MAPRE3	468.393	2.02275	0.11047	6.9122e-41
SPIRE1	1190.16	1.75552	0.0900561	9.19362e-41
BIRC3	908.373	2.86366	0.177838	5.7108e-40
MTSS1	1233.16	1.73721	0.0899635	8.37269e-40
SH3D21	1317.14	1.68686	0.0861381	1.1614e-39
UAP1L1	354.353	2.15775	0.12358	2.46116e-39
SLC12A7	4903.01	1.21943	0.0499648	3.5321e-39
DNAJB9	931.689	1.80248	0.0964197	6.17856e-39
FAM214B	693.786	1.69693	0.0883483	1.3555e-38
ERO1A	2323.95	1.46518	0.0701861	3.97432e-38
SLFN5	2835.19	1.50881	0.0737785	4.94478e-38
VWA7	347.586	2.22997	0.131813	6.59027e-38
FAM102A	2044.52	1.4268	0.0675858	8.80745e-38
ABHD2	12312.9	1.24964	0.0535454	1.75354e-37
LAMC1	2276.44	1.34038	0.0609079	2.17793e-37
HMGCR	5054.4	1.43547	0.0686404	2.66713e-37
KRT20	10983.2	1.39394	0.0658705	5.77071e-37
TMEM159	802.895	1.72244	0.0927032	7.95081e-37
SP100	2278.16	1.37686	0.064546	1.01536e-36
SFN	1282.21	1.54286	0.0780774	1.23467e-36
SOD2	1515.14	1.75259	0.0955181	1.61426e-36
SLC22A18	2010.03	1.37368	0.0648455	2.41833e-36
SLCO4A1	660.116	1.74101	0.0951284	3.3289e-36
OAS1	3708.74	2.2997	0.14181	5.23855e-36
CXCL10	109.606	3.83968	0.269694	7.77175e-36
H2BC21	442.32	1.91686	0.110664	1.15261e-35
FA2H	1177.69	1.56292	0.0814221	1.6557e-35
COL17A1	4020.19	1.18042	0.0496506	2.27869e-35
MAPK8IP3	1553.67	1.34396	0.063535	3.37102e-35
OGFR	2066.51	1.2882	0.0592552	6.16038e-35
PFKP	2982.58	1.31007	0.0612007	9.68013e-35
SAT1	3706.85	1.42906	0.071251	1.32313e-34
GAPDH	45067.6	1.05533	0.039779	2.65552e-34
CREB3L2	878.897	1.49553	0.077326	4.17225e-34
ABCA7	1328.98	1.39097	0.0688359	5.95807e-34
TBC1D2	497.927	1.72577	0.0982877	1.52966e-33
NFE2L1	8754.16	1.12881	0.0470614	2.59701e-33
SQLE	12527.4	2.18225	0.138343	3.7919e-33
SLC28A3	528.271	1.75644	0.101641	5.29833e-33
SC5D	3350.38	1.44877	0.0749766	6.87686e-33
NUCB2	691.278	1.62396	0.0903618	8.92715e-33
IRF7	1848.43	1.44335	0.0746866	1.10874e-32
APOL6	2894.17	1.27753	0.0604986	1.70115e-32
VSIG10L	1496.4	1.38238	0.0698962	2.27169e-32
GSR	1567.76	1.32476	0.0648538	2.84856e-32
RRAS	1242.5	1.42489	0.0740854	4.13455e-32
RTN4R	530.324	1.66017	0.0959844	1.01339e-31
ATG2A	1297.13	1.32704	0.0663985	2.56101e-31
MAFG	2431.74	1.30449	0.0643878	3.36116e-31
TXN	9202.69	1.18857	0.0541044	4.34326e-31
PARP14	7997.21	1.35377	0.0689672	5.42413e-31
CDA	273.01	2.2452	0.14941	7.03128e-31
EBP	657.974	1.63306	0.0943333	8.65495e-31
COL16A1	1006.19	1.50917	0.0834624	1.11143e-30
CREBRF	981.983	1.42443	0.0762522	1.61504e-30
FICD	247.17	2.20175	0.147554	2.50714e-30
IGSF3	1840.72	1.25754	0.0616596	4.04077e-30
PLAUR	1533.33	1.53301	0.0869776	5.70555e-30
PNRC1	947.693	1.50971	0.0851048	8.11607e-30
P4HB	12464.2	1.06793	0.0446809	1.25863e-29
OASL	1354.23	2.51794	0.179025	2.25149e-29
RIPOR1	915.418	1.41143	0.0765678	2.7722e-29
HLA-A	6164	1.15429	0.0528428	3.41702e-29
SFXN3	2135.31	1.29637	0.0663601	4.57061e-29
PRSS3	627.655	1.60495	0.0952682	5.90597e-29
PATL1	3416.96	1.21025	0.0584483	7.35908e-29
TCIRG1	1461.91	1.36809	0.073396	1.09101e-28
KLK6	2843.31	1.19688	0.0575552	1.38546e-28
ISG15	2378.63	2.21717	0.153535	1.68144e-28
S100A14	2008.62	1.28962	0.0664236	2.05664e-28
PSAP	15426.8	1.10237	0.0488519	2.92097e-28
CALU	6305.01	1.14849	0.0532095	3.36844e-28
BLOC1S3	608.451	1.62351	0.0981897	3.88533e-28
CDHR5	970.544	1.56602	0.0927767	4.41392e-28
SIPA1	543.876	1.56194	0.092714	5.19845e-28
CIB1	2861.05	1.28767	0.066714	6.01668e-28
CA9	1516.22	1.2798	0.0661134	7.06353e-28
LSMEM1	233.294	2.06601	0.141016	8.18814e-28
ELOVL7	902.665	1.3784	0.0756038	9.40809e-28
STAT2	1202.5	1.36094	0.0744125	1.4233e-27
PGK1	22740.9	1.17875	0.0573839	1.99765e-27
SIRT2	2259.86	1.22355	0.0618422	2.7138e-27
POLM	701.11	1.43919	0.0830323	3.77805e-27
GCLM	1006.37	1.36279	0.0757569	5.08913e-27
CLCN6	679.063	1.62389	0.101667	8.80351e-27
TINAGL1	5381.25	1.12194	0.0526311	1.36084e-26
DNAJC12	439.239	1.75198	0.114709	2.02134e-26
DENND3	1436.91	1.23007	0.0635723	2.85168e-26
NDUFA4L2	695.78	1.54467	0.0946829	3.34365e-26
SLC25A29	1300.44	1.27641	0.0682368	3.84837e-26
YPEL5	1421.31	1.25371	0.0661655	4.50539e-26
SULT2B1	843.301	1.50942	0.0916426	5.30514e-26
UPP1	483.703	1.68133	0.108874	8.01236e-26
SLC20A1	1143.69	1.36606	0.0783686	1.53037e-25
ARFGAP3	1128.4	1.32521	0.0745207	2.26918e-25
SEL1L	2831.84	1.11035	0.0531093	3.62421e-25
VPS18	925.22	1.35928	0.0782998	4.19666e-25
ZNF165	360.939	1.85168	0.128296	4.86451e-25
SEMA4B	5270.49	1.24071	0.0664856	5.60281e-25
CDKN2A	1584.35	1.19137	0.0615456	6.41702e-25
GPRC5C	1243.01	1.33424	0.076323	1.04715e-24
WFS1	860.242	1.37548	0.0809763	1.38013e-24
RASSF6	784.532	1.43263	0.0868612	1.58349e-24
TJP3	1458.78	1.23349	0.0670604	2.49622e-24
CRY2	731.551	1.4133	0.0859806	3.18596e-24
IFIT1	2108.09	2.77468	0.227306	3.87632e-24
B2M	13718	0.984259	0.0415535	5.58703e-24
ADAM17	1492.91	1.25295	0.0695668	6.51286e-24
PRSS23	722.5	1.48729	0.0939773	7.43928e-24
TCP11L2	594.33	1.52311	0.0978366	8.48407e-24
PITPNM1	1286.81	1.23564	0.0681651	1.13707e-23
HLA-E	3640.82	1.07713	0.0517333	1.56284e-23
PLEKHG6	667.455	1.40038	0.0857963	2.01702e-23
DNM1	4021.35	1.10698	0.055088	2.32212e-23
PRSS22	902.286	1.32271	0.0779888	2.67862e-23
CARD19	637.568	1.4355	0.0900646	3.09292e-23
CTSD	3159.77	1.08859	0.0533568	3.5252e-23
ATP6V0D1	846.363	1.33237	0.0795353	4.68327e-23
MARK4	725.732	1.38149	0.084809	5.35348e-23
FDFT1	5186.58	1.10119	0.0553117	7.19336e-23
TXNRD1	17655	1.9314	0.1449	8.91477e-23
PARP12	1406.42	1.38841	0.0868232	1.13792e-22
TGM2	5416.81	1.02474	0.0476743	1.76195e-22
BICDL1	691.32	1.41324	0.0899467	2.13457e-22
RAB11FIP4	2827.1	1.0985	0.0557768	2.51071e-22
TNFSF10	588.666	1.53631	0.103377	2.9006e-22
NAA80	163.753	2.26093	0.182887	3.8578e-22
RNF213	6974.39	1.12802	0.0592725	4.42249e-22
SAT2	180.231	2.03913	0.160359	6.71831e-22
FAM114A1	593.796	1.45817	0.0964362	8.23361e-22
DHX58	573.465	1.61065	0.11338	9.86421e-22
AKR1C3	1687.16	1.24988	0.0737157	1.19357e-21
RDH11	2066.67	1.11253	0.0584893	1.39996e-21
CTSL	197.067	2.06217	0.164377	1.67935e-21
CAPN5	3068.65	1.09878	0.0572086	1.97134e-21
MGAT4B	4706.18	0.992468	0.0453763	2.2643e-21
LIPG	1476.67	1.21408	0.0700629	2.55953e-21
YOD1	774.696	1.44348	0.0957845	3.22428e-21
TMBIM1	7091.14	1.05144	0.0520537	3.56749e-21
NXPH4	223.566	1.92122	0.149448	3.97958e-21
RRAGC	379.208	1.63417	0.118707	5.02624e-21
CA12	5966.14	1.11683	0.0601817	6.0779e-21
GLA	877.87	1.31663	0.0829169	7.2616e-21
SPAG4	701.145	1.33168	0.0846553	8.47773e-21
MKNK2	5177.93	1.10511	0.059073	1.12381e-20
PRSS8	2049.87	1.0931	0.0579129	1.44418e-20
MYO18A	5471.47	1.02419	0.0501038	1.63865e-20
ZNF841	1216.23	1.18616	0.068761	1.87704e-20
SRRM1	2494.24	1.19238	0.0696463	2.16571e-20
CAPN8	5092.73	1.07133	0.0558019	2.7657e-20
IRAK2	640.234	1.43925	0.0981266	3.40153e-20
MX1	1336.19	2.352	0.203871	4.1883e-20
HELZ2	5364.53	1.71608	0.131087	4.83112e-20
DDX58	2009.74	2.06985	0.172191	5.50175e-20
PTPRJ	1749.14	1.09956	0.0597298	6.21881e-20
ZSWIM8	818.045	1.26571	0.0795771	8.55543e-20
SLC29A4	348.65	1.57429	0.116244	1.16455e-19
TAP2	637.183	1.44709	0.101319	1.34361e-19
ZNF292	1651.15	1.15039	0.0671884	2.07436e-19
MYH14	14189.4	0.97657	0.0470014	4.44173e-19
MICA	629.05	1.3153	0.0876797	5.26056e-19
ECE1	4512.12	1.03992	0.0546356	6.09396e-19
HMGXB3	2028.91	1.05595	0.056569	6.93252e-19
RGCC	242.145	1.84935	0.152503	8.05858e-19
EIF2AK2	4369.4	1.15611	0.0689862	9.29794e-19
MFGE8	855.527	1.23997	0.0792301	1.06643e-18
MYO5B	2893.47	1.08936	0.0611084	1.21846e-18
PIR	331.266	1.59689	0.12289	1.3975e-18
IGFL4	227.799	1.7518	0.141914	1.59539e-18
MROH1	1442.27	1.14339	0.0679841	1.80638e-18
EBNA1BP2	688.135	-1.27843	0.0844462	2.02481e-18
HBEGF	915.027	-2.34682	0.213086	2.45907e-18
RILP	180.073	1.88197	0.158278	2.9192e-18
FRMD5	445.388	1.44252	0.105179	3.59957e-18
BTN3A1	417.901	1.46466	0.108141	3.99945e-18
ASPM	2873.12	-1.1209	0.0660175	4.42868e-18
FKBP14	452.781	1.39995	0.100305	4.85929e-18
ZNFX1	4345.53	1.11511	0.0654108	6.29376e-18
ZNF587B	717.107	-1.24162	0.0812887	7.46361e-18
CLDN2	230.236	-1.7491	0.14443	8.09585e-18
DKC1	3212.81	-1.05896	0.0586817	8.72564e-18
FTH1	9504.61	2.04063	0.180754	1.01381e-17
SRSF3	4643.35	-0.973975	0.0484568	1.17542e-17
PREB	1192.05	1.15359	0.0707549	1.34453e-17
GAB2	497.236	1.35488	0.0959945	1.44273e-17
EDEM1	1149.89	1.20708	0.0775931	1.54277e-17
PPIL1	559.295	-1.3404	0.094265	1.64557e-17
FARSB	875.224	-1.20346	0.0774621	1.76908e-17
NOLC1	2943.19	-1.00527	0.0526415	1.89213e-17
WLS	3199.39	0.991476	0.0509957	2.67981e-17
SEC24A	1442.39	1.1059	0.0654245	2.8328e-17
PTGS2	527.4	-1.39862	0.102266	2.99352e-17
PLXNA3	3048.03	1.01313	0.0538267	3.31508e-17
FOXA1	1399.31	-1.16003	0.0728128	4.00545e-17
SPRY1	508.031	-1.3469	0.0970024	4.62566e-17
DNAJC3	2246.67	1.02406	0.0561049	5.45426e-17
FUT4	1269.93	-1.09157	0.0648421	5.95353e-17
STN1	737.335	1.21249	0.0804692	6.51701e-17
ANKRD22	637.537	1.32021	0.0944081	7.1274e-17
CD58	731.08	1.21705	0.0815695	7.95899e-17
HIBCH	476.049	-1.37739	0.102323	8.81407e-17
GNA15	243.847	1.62386	0.134587	1.08725e-16
PARP10	806.949	1.40458	0.106686	1.34485e-16
POP1	355.051	-1.46773	0.115108	1.49873e-16
SPRY4	1269.2	-1.23256	0.0845628	1.82905e-16
TMEM45B	1999.41	1.1383	0.072259	1.99571e-16
TBC1D20	1618.65	1.1129	0.0689867	2.33676e-16
TRIM25	4796.28	1.03113	0.0583786	2.88692e-16
ID2	596.74	-1.29219	0.0926366	3.26903e-16
ECT2	3901.86	-0.958947	0.0490024	3.4676e-16
HSH2D	391.816	1.66509	0.141672	3.67853e-16
NFKBIA	685.358	1.26302	0.0889973	3.89777e-16
DEPTOR	731.011	-1.32326	0.0969555	4.12351e-16
RTN2	313.34	1.55296	0.127244	4.5972e-16
BLVRB	803.557	1.18491	0.0788756	4.83613e-16
HERPUD1	3702.23	1.06084	0.062588	5.07983e-16
JADE1	626.567	-1.29107	0.0929812	5.34223e-16
PLK2	5546.51	-1.04444	0.0605268	5.60951e-16
SRSF8	696.176	-1.22884	0.0848258	5.87586e-16
ALS2CL	595.754	1.30841	0.0953444	6.14821e-16
TYW3	582.747	-1.26473	0.0896463	6.43002e-16
DENND4C	2804.76	0.997388	0.0543905	6.71171e-16
NOSTRIN	499.203	-1.32094	0.0971704	7.01267e-16
TRMT6	516.426	-1.3072	0.0954984	7.3413e-16
IFI44	1490.15	2.33934	0.232291	8.04797e-16
SLC25A25	1185.74	1.26533	0.0901051	8.40501e-16
GALE	3521.31	1.12748	0.0720464	8.82459e-16
CSTB	2594.85	1.05289	0.0621426	9.24331e-16
GOLGA4	4033.97	0.986146	0.0532934	9.66776e-16
WDR43	1623.68	-1.09056	0.0671883	1.00995e-15
GPAT3	572.733	1.39471	0.10763	1.05361e-15
GPC1	398.253	1.40308	0.109081	1.20009e-15
GTPBP1	1644.43	1.05496	0.0627791	1.25781e-15
ILRUN	4376.78	0.967057	0.0511231	1.32127e-15
PSPH	1624.58	-1.189	0.0811845	1.40353e-15
FOXQ1	1017.8	-1.2675	0.0919782	1.49913e-15
IRF9	262.334	1.58786	0.135246	1.59837e-15
SDCBP	6559.9	0.99104	0.0547663	1.69776e-15
TIMP1	1474.09	1.06888	0.0652646	1.79688e-15
TOM1	589.8	1.26414	0.091688	1.90132e-15
CPEB4	1018.77	1.18434	0.0809381	2.00717e-15
ID1	848.382	-1.18911	0.081598	2.11393e-15
ZNF239	262.111	-1.533	0.12849	2.46701e-15
RNF19B	1564.77	1.09016	0.0685891	2.60878e-15
NOP58	1416.64	-1.15673	0.0776799	2.75562e-15
ARSJ	885.076	-1.15995	0.078202	2.9113e-15
PLEKHA4	284.749	1.53114	0.12875	3.22636e-15
SLC44A3	579.395	-1.27115	0.0934464	3.71527e-15
POLD4	349.114	1.41785	0.11346	3.8824e-15
OAS3	6203.5	1.77387	0.162438	4.25059e-15
MRTO4	909.394	-1.15707	0.0782508	4.45853e-15
ETS1	748.9	1.28022	0.0951995	4.8916e-15
HCN3	326.071	1.42738	0.115437	5.12028e-15
OTULINL	698.111	-1.18192	0.0818738	5.35968e-15
HBP1	1563.41	1.11146	0.0722558	5.60715e-15
SEMA3B	1949.06	1.02416	0.0603173	5.86357e-15
TTC39A	758.201	1.24249	0.0909309	7.22513e-15
UGDH	1677.22	1.11889	0.073839	7.59591e-15
OSTM1	318.734	1.43678	0.118136	8.02761e-15
CARD9	718.854	-1.23785	0.090923	8.99872e-15
SPINT1	5578.19	0.926866	0.0476744	9.57168e-15
RIOK1	453.271	-1.31814	0.102296	1.07388e-14
MRNIP	634.519	1.19385	0.0852582	1.41496e-14
PLK1	908.495	-1.1607	0.0806802	1.48792e-14
SDF2L1	159.212	1.79189	0.169173	1.56161e-14
HID1	1150.12	1.10834	0.0733933	1.63681e-14
FAM219A	256.937	1.56081	0.137053	1.79841e-14
BCAS1	1850.06	-1.04429	0.0645135	1.87947e-14
TRIM16L	240.592	1.53304	0.133327	2.04719e-14
EEF1A2	812.624	1.2056	0.0872921	2.13379e-14
MVP	2979.76	0.945617	0.0509364	2.33169e-14
MADD	2934.43	0.95255	0.0519339	2.4406e-14
IL20RB	325.648	-1.52443	0.132787	2.55168e-14
CCDC198	528.326	-1.28274	0.0986615	2.66452e-14
COL9A3	893.596	1.18483	0.0853665	3.19566e-14
ABCC4	1440.64	-1.03862	0.0648167	3.8738e-14
ZNF544	699.697	-1.19544	0.0872509	4.06605e-14
LGALS9	646.793	1.29727	0.101967	4.46896e-14
IRF1	1000.48	1.20991	0.0896703	4.70189e-14
DDX60L	1060.97	1.75762	0.168407	4.94481e-14
ITGAV	3705.48	0.947987	0.0522802	5.22388e-14
FAM131A	590.992	1.29041	0.101754	5.80308e-14
PLEKHA8	1007.09	1.08818	0.0726212	6.11034e-14
POF1B	5497.93	-0.963149	0.054688	7.10835e-14
POLR3C	723.448	-1.22143	0.0920544	7.4478e-14
LZTS3	409.721	1.3842	0.11582	7.82074e-14
MMP7	1313.37	1.03924	0.0658375	8.19448e-14
IFI35	516.156	1.30752	0.104729	8.56884e-14
PGD	4653.37	0.924929	0.0492994	8.95132e-14
MTMR11	1478.02	1.00961	0.0617184	1.01515e-13
ZBTB43	508.917	1.29021	0.102779	1.06359e-13
ABHD12	2401.69	0.965902	0.0555339	1.11266e-13
SND1	7353.89	0.884401	0.0437548	1.2185e-13
FFAR4	544.452	-1.24165	0.0960031	1.2744e-13
KIF11	1931.1	-0.984049	0.0584062	1.33318e-13
MICALL2	1436.73	1.08755	0.0735556	1.39188e-13
ASPH	9556.78	0.95432	0.0542101	1.4591e-13
NIP7	480.494	-1.245	0.0969773	1.52977e-13
PJA2	2045.98	0.976644	0.0577283	1.61173e-13
LANCL2	379.73	-1.31332	0.107712	1.7078e-13
HSP90B1	16280.9	0.875682	0.0430161	1.80616e-13
TP53INP1	332.523	1.43238	0.125417	1.90535e-13
NOL11	1925.55	-0.972776	0.0574332	2.20948e-13
LAMB3	5655.46	1.38297	0.118182	2.31066e-13
UFD1	1567.49	1.01315	0.063422	2.41229e-13
SNX18	473.267	-1.25406	0.0994322	2.8481e-13
TPX2	4860	-0.889958	0.0454834	3.37575e-13
DGCR8	1152.88	-1.06461	0.0716728	3.67631e-13
GMPPA	823.99	1.13208	0.0817824	3.82866e-13
ZMPSTE24	1019.68	-1.05877	0.0709842	4.16505e-13
DHFR	753.721	-1.11331	0.0791824	4.33572e-13
TRIM5	793.684	1.15358	0.0852593	4.50997e-13
KIF12	453.945	-1.33259	0.112197	4.69082e-13
GLRX	477.869	1.25525	0.100908	4.89985e-13
NSDHL	1299.94	1.06309	0.0721048	5.34164e-13
MAP3K9	794.906	1.10896	0.0790853	5.57487e-13
CDKN1A	3357.52	1.71984	0.171334	5.81062e-13
PPP2R5B	373.959	1.30644	0.108964	6.04985e-13
TLCD2	343.517	1.401	0.123603	6.32257e-13
KRT19	8965.71	0.970096	0.0585189	6.63664e-13
KIF4A	1728.93	-0.978991	0.0599687	6.97409e-13
GPD1	331.638	1.35914	0.117868	7.31615e-13
BORA	609.114	-1.17489	0.0899886	7.6883e-13
NBL1	490.35	1.21851	0.0967037	8.07014e-13
PLBD1	188.025	-1.59449	0.154143	8.45662e-13
KIF18A	921.438	-1.09428	0.0779961	8.89665e-13
ATF7IP	1269.44	-1.05547	0.0720632	9.3382e-13
CHP1	3514.21	0.92257	0.0517167	9.78187e-13
PPP1R18	652.486	1.19278	0.0932509	1.02554e-12
HOXA10	441.074	-1.24755	0.101857	1.17621e-12
EIF5	4210.68	-0.91442	0.0507009	1.22996e-12
GEN1	882.043	-1.11318	0.0814356	1.34245e-12
HOXB8	524.113	-1.34712	0.117544	1.40112e-12
SLC25A1	2515.42	0.931041	0.0534022	1.46104e-12
TNFRSF14	1260.99	1.05282	0.0724156	1.59439e-12
MAN1A1	1142.53	1.03677	0.07015	1.6724e-12
C12orf4	360.923	-1.28695	0.109016	1.75091e-12
USP18	168.093	1.7241	0.177001	1.83111e-12
ZNF83	658.237	1.1799	0.0925257	1.91433e-12
HK2	1109.9	1.10064	0.0802325	1.99883e-12
CEP152	1050.73	1.07815	0.0769874	2.27414e-12
TRAFD1	593.445	1.1611	0.0903135	2.38969e-12
DNAJB2	1179.92	1.0538	0.0735767	2.5107e-12
ZNF195	1311.64	-1.03913	0.0713617	2.63776e-12
UNG	714.667	-1.10963	0.0824487	2.76515e-12
HPCAL1	1399.85	1.02204	0.0687251	2.89548e-12
LIF	740.05	1.13391	0.0865595	3.04203e-12
IRF5	388.672	1.29084	0.111867	3.39321e-12
IBTK	3175.24	0.938202	0.0560405	3.94342e-12
UBTD1	193.63	1.63748	0.166982	4.12984e-12
PRDM10	490.997	1.27192	0.109053	4.51037e-12
PGM3	1484.83	1.00122	0.0660882	4.70112e-12
PIP4P1	677.215	1.11922	0.0849145	5.09394e-12
TTC26	278.204	-1.40779	0.131351	5.75444e-12
NOP56	2143.66	-0.941981	0.0570114	5.9934e-12
UBC	18961.3	0.962922	0.060364	6.47212e-12
COLCA2	574.646	-1.15655	0.0913215	6.7143e-12
CRELD2	277.242	1.44487	0.137505	7.21242e-12
GPRC5A	5981.35	-1.02339	0.0704405	7.77635e-12
CDCP1	1405.38	1.11469	0.0851214	8.0795e-12
CDC42EP1	1242.17	-1.02282	0.0703788	8.38529e-12
DDR1	3396.71	0.901541	0.0510036	9.05186e-12
SLC25A28	539.033	1.18642	0.0969686	9.73471e-12
AGAP1	2323.52	0.921216	0.05426	1.00891e-11
ZNF551	363.354	-1.28184	0.112485	1.04467e-11
UBR4	10428.6	0.879448	0.0475481	1.0808e-11
NARF	759.726	1.09709	0.0827438	1.15387e-11
SMIM14	1558.3	0.975791	0.0631535	1.19089e-11
SEC61A1	8486.19	0.863759	0.0451715	1.23207e-11
DGKD	927.328	1.0318	0.0724241	1.31509e-11
H1-10	1139.92	1.09226	0.0822428	1.35697e-11
MTHFR	907.862	1.07168	0.0790108	1.40104e-11
CBFA2T2	1431	0.978492	0.0638859	1.44507e-11
GSDMB	664.783	1.13615	0.0895559	1.53463e-11
KIF14	773.177	-1.08565	0.0815987	1.63243e-11
ARFGAP1	2598.79	0.935979	0.0572492	1.68484e-11
ZNF888	1484.15	-0.983946	0.0651042	1.79094e-11
AARS1	12527.8	0.915784	0.0540114	1.84516e-11
SYK	723.132	-1.07939	0.0807566	1.95415e-11
RAD9A	347.827	1.32034	0.120324	2.01287e-11
PRTFDC1	396.923	-1.23005	0.105552	2.0715e-11
KREMEN1	510.154	1.17091	0.0959965	2.19379e-11
TRUB1	523.734	-1.15994	0.0942346	2.25592e-11
PEA15	1464.78	1.02856	0.0727461	2.31943e-11
MT-ND3	10219	-0.958088	0.0613641	2.45356e-11
RANBP1	3092.3	-0.900043	0.0519095	2.52921e-11
SELENOK	437.012	1.26075	0.111444	2.83374e-11
IFITM1	106.327	2.04564	0.24121	2.91568e-11
TADA2A	785.501	-1.0879	0.0831444	3.00102e-11
CAPN2	4685.93	0.93307	0.0575689	3.08735e-11
LACC1	364.233	1.29033	0.116831	3.35267e-11
ZNF594	334.481	-1.26943	0.113449	3.53907e-11
PIF1	353.348	-1.34641	0.126493	3.64046e-11
SLC7A7	323.844	-1.2761	0.115001	3.95605e-11
STAT1	6847.65	1.4447	0.143103	4.06443e-11
MCL1	7222.64	-0.919187	0.0557654	4.18303e-11
ST6GALNAC4	392.209	1.226	0.106963	4.3016e-11
SQOR	339.562	1.3105	0.121308	4.5556e-11
ZNF143	568.295	1.14138	0.0933069	4.83989e-11
RIT1	866.284	1.08174	0.0835454	4.99791e-11
IL6R	372.285	1.35356	0.129764	5.1803e-11
NINJ1	625.78	1.0872	0.0848301	5.36519e-11
RUVBL1	1623.85	-0.973467	0.065629	5.55055e-11
SPRY2	613.097	-1.12015	0.0904255	5.73681e-11
GBP2	744.303	1.10615	0.0884584	6.17173e-11
GRINA	2012.33	0.93687	0.059777	6.39713e-11
CHAMP1	640.048	-1.08509	0.0851325	6.63987e-11
SRPRA	4742.76	0.886131	0.0513295	7.38925e-11
ARHGAP11A	1833.9	-0.97569	0.0666387	7.64736e-11
ADGRG6	1935.56	-1.06698	0.0822575	7.91046e-11
LAMP3	305.654	2.10055	0.25997	9.0974e-11
PNPLA8	1740.41	1.01781	0.0742711	9.41444e-11
GPI	7799.18	0.912447	0.0562071	9.73389e-11
KLF10	1388.66	-1.0181	0.0744246	1.00659e-10
DNAJC22	516.469	-1.14908	0.0971263	1.0765e-10
ABLIM3	2290.94	0.961313	0.0648625	1.11324e-10
ZNHIT6	445.549	-1.16224	0.0995141	1.1502e-10
STX19	113.775	-1.76918	0.204327	1.18828e-10
TMEM65	1905.67	0.99453	0.0707564	1.22802e-10
FAM50A	2136.71	0.955645	0.0642403	1.3127e-10
URB2	384.405	-1.25011	0.115456	1.44999e-10
FAM162A	1565.79	1.09591	0.0888764	1.5967e-10
YAE1	213.645	-1.38463	0.139274	1.69831e-10
KCNK1	544.504	1.14931	0.0985101	1.80828e-10
ULBP2	126.604	1.65693	0.187321	1.92268e-10
PRKCA	1529.58	0.95364	0.0647208	1.99008e-10
NECTIN3	487.79	-1.1401	0.0975178	2.05887e-10
ATP6V0B	1735.52	0.984385	0.0701726	2.1278e-10
TSTA3	1009.83	-0.987101	0.0707286	2.26872e-10
HES6	344.658	-1.22993	0.11388	2.64803e-10
VWA2	533.439	-1.11975	0.0945552	2.81546e-10
RHBDF2	461.685	1.169	0.103301	2.90039e-10
CALR	6010.52	0.880836	0.0523575	3.072e-10
NCS1	338.285	1.27446	0.122165	3.16149e-10
IRF2	439.896	1.16553	0.103105	3.25817e-10
CSTF2	711.175	-1.06555	0.0854528	3.45686e-10
PHLDA3	263.702	1.32431	0.131724	3.66626e-10
SMAD3	4367.5	0.931951	0.0619198	3.77866e-10
CDK2AP2	967.94	0.982791	0.0711044	3.89691e-10
GRHL1	482.921	1.16806	0.104253	4.01624e-10
KIF16B	631.818	1.06777	0.0864735	4.3885e-10
FRRS1	497.952	1.14269	0.10026	4.67004e-10
S100A2	168.19	1.55905	0.175328	4.81705e-10
KNSTRN	1268.39	-0.953544	0.0663629	4.9653e-10
PKM	25296.8	0.882467	0.0537018	5.42746e-10
NPC2	838.744	1.00697	0.0763933	5.92339e-10
DZIP3	456.323	-1.14526	0.101646	6.11034e-10
RASD1	104.628	-1.71988	0.2059	6.29713e-10
ELOVL1	3211.65	0.947349	0.065836	6.49204e-10
OSBPL2	2502.41	0.888436	0.0551388	6.88136e-10
PARP9	2768.72	1.45864	0.158756	7.07629e-10
ALKBH8	272.017	-1.30394	0.130664	7.46659e-10
EIF3J	2869.59	-0.870624	0.0519178	7.66148e-10
PPP1R13L	970.252	0.978916	0.071787	8.08349e-10
EFNB2	532.949	-1.09398	0.0927774	8.29604e-10
PPARA	1476.45	0.938433	0.0646142	8.74459e-10
KLHL21	715.802	1.04203	0.0835737	9.21152e-10
NDC80	1862.5	-0.960917	0.0688026	9.45104e-10
CLK3	1641.55	0.942651	0.0655117	9.69619e-10
SBNO2	1070.95	1.00503	0.0769951	9.94678e-10
TWNK	507.249	-1.12028	0.0981961	1.02032e-09
ZWINT	1377.69	-0.959576	0.0687686	1.04652e-09
FLYWCH1	487.432	1.12971	0.100016	1.0728e-09
UNC5B	1423	1.50431	0.169064	1.12696e-09
SEZ6L2	805.84	1.02286	0.0805828	1.18307e-09
GRB7	1255.1	0.974984	0.0719053	1.21273e-09
ANO9	2020.12	0.981252	0.073129	1.24322e-09
NIFK	594.233	-1.12442	0.0995526	1.27368e-09
SLC44A5	601.514	-1.07681	0.0908471	1.33568e-09
PTP4A3	282.142	1.28588	0.129761	1.40179e-09
VEGFB	663.981	1.04296	0.0847937	1.43516e-09
PAPSS2	1960.77	-0.908088	0.0599809	1.47133e-09
RGS16	338.09	-1.29016	0.130955	1.50785e-09
NFKBIE	319.018	1.24746	0.123322	1.66085e-09
ACTG1	35304.8	0.844975	0.048442	1.70087e-09
PARVA	1630.69	-0.931462	0.0645892	1.74147e-09
ARG2	163.245	1.62246	0.194014	1.91076e-09
IRS2	608.585	1.06152	0.0893219	1.95836e-09
YPEL3	309.194	1.21603	0.118426	2.10543e-09
DHX9	4326.02	-0.85428	0.0505693	2.1553e-09
VPS13C	2705.7	0.866951	0.0530143	2.25797e-09
CLCN7	931.771	1.00058	0.0781913	2.36284e-09
ATP6V1D	1025.54	0.988008	0.075871	2.41616e-09
SYT13	636.542	1.03558	0.0850314	2.52727e-09
OAS2	1556.43	2.07047	0.280461	2.58522e-09
PNO1	390.9	-1.1508	0.106846	2.64331e-09
ADNP	5327.36	-0.826305	0.0455781	2.70152e-09
HGH1	252.065	-1.29555	0.134229	2.76005e-09
SRSF6	3920.99	-0.837933	0.047851	2.82092e-09
GOLGA2	2832.2	0.859235	0.0519214	2.88314e-09
POGLUT1	381.048	-1.19756	0.116344	3.1471e-09
H2BC5	217.67	1.39761	0.15436	3.21527e-09
HSF4	353.736	1.17072	0.111488	3.28753e-09
AASDHPPT	679.991	-1.03726	0.0860952	3.35989e-09
DUSP5	1160.53	2.23196	0.314136	3.51196e-09
MYO15B	796.585	1.05537	0.0897265	3.5884e-09
SPSB1	254.656	1.25903	0.128659	3.74385e-09
SMCR8	831.745	1.02008	0.0833064	4.07512e-09
STAG1	1174.92	-0.967937	0.0733238	4.15938e-09
TESC	1037.07	-0.978075	0.0752995	4.24462e-09
ZBTB5	736.653	1.00547	0.0809281	4.59983e-09
CDKN2B	639.29	1.14415	0.107667	4.69812e-09
GPX3	530.372	1.07734	0.0949048	4.79933e-09
H1-2	190.873	1.36999	0.151338	4.90083e-09
LYAR	456.87	-1.0985	0.0990423	5.00341e-09
SGPP2	2344.46	0.929589	0.0665365	5.41966e-09
TGFBI	1326.07	-0.935425	0.0679044	6.18596e-09
SAPCD2	825.914	-0.978268	0.0763053	6.42308e-09
HPS3	1003.97	0.949933	0.0708756	6.54496e-09
CYP3A5	7459.57	0.930956	0.0673356	6.92263e-09
PCED1B	337.769	1.16768	0.113626	7.3216e-09
UGT1A10	1175.96	0.948618	0.0709415	7.4586e-09
ZNF518A	1684.73	-0.894425	0.0605241	8.30613e-09
SCYL3	539.208	-1.07839	0.0965341	8.45282e-09
LMNB1	1448.4	-0.982801	0.0778414	8.5997e-09
UTP23	1035.62	-0.95874	0.073243	8.75268e-09
SHFL	331.307	1.18751	0.118168	9.06338e-09
MKNK1	620.441	1.03721	0.0887155	9.37619e-09
POLR3B	365.017	-1.13576	0.108063	9.53309e-09
B3GNT5	872.437	1.00344	0.0822146	1.00108e-08
SDC4	4396.2	1.32915	0.146229	1.01734e-08
SLC6A8	2761.86	0.876333	0.0574119	1.05216e-08
LRRC40	405.111	-1.11524	0.104657	1.10585e-08
NFKBIB	1003.05	0.969777	0.0762684	1.18402e-08
BRCC3	872.338	-0.967174	0.0757528	1.20436e-08
STAMBPL1	638.411	-1.01063	0.0844037	1.24532e-08
ARHGEF28	1893.14	0.897261	0.0620268	1.30892e-08
TSC22D1	4189.73	0.8716	0.0570019	1.3739e-08
ALDH3A2	2005.63	0.863101	0.0554809	1.44346e-08
RAB11FIP5	506.277	1.08855	0.100474	1.49111e-08
TRIM56	4017.32	0.884504	0.0597712	1.515e-08
PDSS1	146.308	-1.47192	0.177115	1.5632e-08
SLC16A3	1249.58	0.942186	0.0713402	1.58751e-08
TWISTNB	499.157	-1.06046	0.0949815	1.61191e-08
WARS1	5480.93	0.944083	0.0718032	1.63692e-08
CYSTM1	3486.65	0.84671	0.0523552	1.71214e-08
TIMM10	377.019	-1.14333	0.111873	1.7903e-08
TMEM139	251.842	-1.25421	0.134148	1.84301e-08
PELO	977.976	0.964294	0.0762484	1.92539e-08
ALDH7A1	983.676	-0.946893	0.0729477	2.045e-08
UPF3B	928.413	-0.950688	0.0737447	2.07559e-08
PSMB8	447.624	1.08507	0.100978	2.16922e-08
SLC16A4	1070.48	0.959873	0.0760223	2.23727e-08
FXYD5	622.238	1.03847	0.0920382	2.30876e-08
PIP4K2A	440.412	1.11941	0.108553	2.38147e-08
NAT10	1483.62	-0.902179	0.0644777	2.41872e-08
PUS7	685.462	-0.992356	0.0829595	2.49579e-08
RBM15	821.455	1.00076	0.0847433	2.53558e-08
TMEM38B	339.769	1.15709	0.116612	2.57536e-08
UBE2L6	244.946	2.20843	0.33151	2.7781e-08
ARMCX3	1371.18	0.903082	0.0649836	2.81983e-08
RBM4B	375.379	-1.09854	0.105327	2.908e-08
ZNF512	352.251	-1.14202	0.11427	2.95433e-08
HYAL3	142.842	1.40771	0.169614	3.15578e-08
DDX52	1418.46	-0.889277	0.062812	3.20967e-08
MSN	10050.8	0.865143	0.0579618	3.26669e-08
UTP25	786.453	-0.964041	0.0785844	3.44386e-08
IRS1	1298.78	-0.91015	0.0674946	3.50541e-08
SHROOM4	626.766	1.02717	0.0918433	3.56788e-08
TICAM1	240.421	1.20948	0.129888	3.76035e-08
GRIN2D	701.544	1.05329	0.0974897	3.89064e-08
WNT7B	383.692	1.08665	0.104568	3.95826e-08
NAGK	529.101	1.03755	0.0947802	4.38283e-08
ARHGEF18	393.59	1.07517	0.102735	4.61087e-08
TNNT1	224.937	1.24322	0.137994	4.68762e-08
PHKA1	547.97	1.03265	0.0943034	4.8551e-08
AMFR	1136.43	0.907193	0.0679324	4.94287e-08
BTBD16	137.515	-1.40199	0.172883	5.22117e-08
FAM136A	1352.1	-0.901197	0.0669385	5.31738e-08
UBP1	1482.61	-0.889145	0.0645353	5.61685e-08
ATP6V0E1	1285.46	0.889975	0.0649311	5.92965e-08
FGD6	1093.03	0.943738	0.0765237	6.15704e-08
UBE2E3	682.528	-0.974251	0.0830972	6.50355e-08
MRPL3	1797.28	-0.862093	0.0592113	6.62158e-08
WHAMM	526.914	1.03669	0.0965762	6.85926e-08
HMOX1	163.84	1.32877	0.159114	6.98013e-08
HCAR1	1886.82	-0.943553	0.076851	7.23142e-08
ERG28	1097.88	0.904446	0.0684834	7.35769e-08
MEX3A	626.931	-1.01867	0.0930354	7.48593e-08
JUN	2404.05	-0.911167	0.0700247	7.74407e-08
SGO2	534.652	-1.02363	0.0942324	7.87602e-08
C12orf49	1843.47	0.867229	0.0608495	8.4404e-08
NME1	573.095	-1.02073	0.0939926	8.86961e-08
NSD1	2757.92	-0.834659	0.0538695	9.01368e-08
AGL	1090.33	-0.90469	0.0690396	9.16055e-08
KRCC1	671.005	-0.997153	0.0890106	9.30738e-08
LMAN1	3405.48	0.814735	0.0496975	9.45956e-08
ITPR3	10310.7	0.777554	0.0416644	9.61224e-08
NCR3LG1	1336.61	0.884242	0.0648432	9.77018e-08
HDLBP	17840.5	0.764131	0.0388859	1.02544e-07
RNF114	1825.59	0.855837	0.0590352	1.14561e-07
PIM3	1238.44	0.902731	0.0693931	1.18264e-07
CHKA	1023.17	0.921692	0.0735699	1.2014e-07
EML2	1163.35	0.919055	0.0731231	1.27771e-07
KIAA1522	6742.54	0.794287	0.0458842	1.29778e-07
AKNA	905.839	1.01318	0.0941757	1.36137e-07
BNIP3L	761.007	0.999743	0.0913107	1.4478e-07
PRKD2	2025	0.851773	0.0587746	1.49179e-07
DDIT3	2348.63	1.21773	0.139673	1.56051e-07
POFUT1	1952.01	-0.844177	0.0572753	1.58405e-07
ZNF326	952.455	-0.923913	0.0749901	1.63203e-07
SERPINA1	8610.34	0.81628	0.0512409	1.65683e-07
PLAG1	549.27	1.03411	0.0995103	1.68168e-07
ELMO3	1049.9	0.917761	0.073755	1.70666e-07
RIOX2	901.769	-0.926327	0.0757536	1.75774e-07
SLC17A9	1524.32	0.888583	0.0676099	1.86479e-07
CDC20	1276.86	-0.88619	0.0672418	1.94951e-07
RBM33	3780.71	0.82634	0.053888	1.97845e-07
ISL1	169.148	-1.27588	0.154305	2.00757e-07
PANK4	442.885	1.05494	0.104983	2.06583e-07
LMTK3	359.39	1.11751	0.119051	2.09544e-07
CXCL8	313.13	2.0169	0.32041	2.18515e-07
ALCAM	419.687	1.04455	0.103003	2.21627e-07
IVD	1786.64	-0.862996	0.0623394	2.24763e-07
CD55	4187	1.36632	0.175408	2.31136e-07
RESF1	2284.41	-0.966457	0.0856512	2.3435e-07
LIMK1	561.273	0.98003	0.0892796	2.41723e-07
PTGR1	1852.75	0.852624	0.0605114	2.45442e-07
ANXA2	29212.4	0.80541	0.0498987	2.53045e-07
SAMD9	3645.87	1.13638	0.124841	2.56861e-07
NBEAL2	2745.89	0.840847	0.0580119	2.68567e-07
RANBP6	1023.83	0.894816	0.0702622	2.7249e-07
FAM3C	391.769	1.05488	0.106855	2.84702e-07
CMTM3	274.65	-1.14612	0.128529	3.03807e-07
IGIP	265.126	1.17181	0.13445	3.08626e-07
REN	117.897	1.46467	0.201736	3.18344e-07
PDZK1	147.811	-1.31143	0.166595	3.23237e-07
KLK11	1712.92	0.847182	0.0601538	3.28158e-07
CD59	5122.69	1.163	0.132675	3.33127e-07
CACNB3	774.125	0.93237	0.0798032	3.58087e-07
SLC43A1	1583.75	-0.897491	0.0717984	3.63103e-07
PARP1	2155.31	-0.831516	0.0566874	3.68197e-07
NOC3L	529.8	-0.977768	0.0903647	3.78464e-07
HPS4	753.751	0.926553	0.0786087	3.8363e-07
ZNF131	1499	-0.8531	0.0618809	3.89103e-07
SLC66A1	219.7	1.19427	0.140659	3.94601e-07
HSD17B12	1900.75	0.847757	0.0607985	4.00345e-07
MAPK6	5329.84	0.844035	0.0600548	4.23753e-07
COQ10B	552.001	1.00309	0.0969456	4.29713e-07
MEIS2	753.176	-0.94127	0.0826647	4.41724e-07
POR	1414.23	0.878501	0.0681641	4.53865e-07
S100A6	25185.2	0.77832	0.0449051	4.59983e-07
PLEKHM1	730.718	0.935511	0.0814423	4.6614e-07
KCTD7	614.593	0.96296	0.0878949	4.72396e-07
PTPN3	1899.63	0.832357	0.0576289	4.91671e-07
SEC14L1	1687.32	0.849392	0.0618864	5.05794e-07
C9orf152	706.324	-0.940756	0.0832931	5.12908e-07
IFT81	474.396	-0.99925	0.0970015	5.20033e-07
HENMT1	345.758	-1.07787	0.115871	5.35425e-07
TNFRSF12A	2694.79	-0.857588	0.0641333	5.58663e-07
MTMR4	1302.17	0.878176	0.0689771	5.66423e-07
DARS2	605.431	-0.958889	0.0879766	5.74192e-07
TRIM66	738.676	-0.932003	0.081872	6.06197e-07
PANK3	3537.77	0.814759	0.0542326	6.14396e-07
ASS1	2400.2	0.874867	0.0684846	6.22742e-07
BIRC5	925.353	-0.894706	0.0732361	6.39664e-07
AKR7A3	572.776	-0.973249	0.0918666	6.4823e-07
CTSB	2217.68	0.814245	0.0542688	6.56851e-07
PTPN13	760.552	-0.924227	0.0803354	6.65533e-07
PARPBP	373.071	-1.05988	0.112579	6.83108e-07
PKIB	632.166	0.943408	0.0850412	6.92087e-07
SPTSSA	303.737	1.11929	0.126798	7.01092e-07
JAG1	2021.36	0.922991	0.0803116	7.19433e-07
WBP4	537.505	-0.984981	0.0953394	7.29198e-07
DUSP3	1687.46	0.843252	0.0615637	7.38959e-07
SBF1	1786.22	0.84515	0.0621004	7.88533e-07
GDI1	3757.88	0.806756	0.0529799	8.18502e-07
PLEKHA1	1781.84	0.839626	0.0609429	8.39116e-07
RAB22A	2142.9	0.852448	0.0641997	8.81784e-07
NLN	918.039	-0.888586	0.0728941	8.92771e-07
RNF24	587.717	0.959941	0.0901256	9.03981e-07
F2RL1	1483.47	-0.923395	0.0814695	9.15518e-07
TMEM214	1729.75	0.844816	0.0626121	9.38905e-07
UTP4	1139.28	-0.920882	0.081048	9.509e-07
NDUFA5	696.256	-0.927804	0.0827881	9.87162e-07
MRPL55	378.553	1.03234	0.108167	9.99574e-07
SLC7A11	6167.27	-0.849757	0.0641815	1.01257e-06
EXTL2	400.859	-1.04005	0.110505	1.026e-06
RND1	271.985	1.86223	0.31048	1.03968e-06
LACTB2	721.855	-0.926013	0.083272	1.08397e-06
SDR16C5	219.097	1.14662	0.137321	1.12885e-06
LACTB	416.397	0.997993	0.101284	1.1602e-06
SLC11A2	2933.56	0.850812	0.0652621	1.17642e-06
IFT46	440.467	-0.997657	0.101355	1.19274e-06
ANAPC7	893.426	-0.889407	0.0748642	1.20943e-06
BHLHE41	2011.79	0.837226	0.0620618	1.22623e-06
PHF19	996.659	-0.876644	0.0717818	1.24311e-06
MAP1S	309.688	1.05503	0.115767	1.27719e-06
TMED9	2636.27	0.856362	0.0671056	1.31251e-06
PLD1	1355.19	-0.846332	0.0646992	1.33114e-06
S100A16	2235.04	0.867338	0.0700625	1.38841e-06
VDR	559.947	0.945136	0.0893851	1.40781e-06
LRATD2	9196.2	-0.783533	0.0493018	1.42734e-06
BCAS2	566.331	-1.00136	0.103741	1.48845e-06
GTF3C6	453.655	-0.989859	0.100974	1.53036e-06
SYTL2	1821.33	-0.837947	0.0632514	1.61729e-06
PKDCC	871.084	-0.893342	0.0771475	1.63933e-06
LRSAM1	533.03	0.959843	0.0938042	1.66143e-06
KRR1	783.06	-0.903471	0.0797831	1.68391e-06
TSPAN5	700.781	0.944798	0.0901628	1.70649e-06
IFI6	1310.83	1.50426	0.230423	1.72916e-06
AHCYL2	704.781	0.920945	0.0842975	1.7522e-06
ERRFI1	6271.95	-1.32761	0.186786	1.82314e-06
QPCTL	328.829	1.03152	0.112781	1.89885e-06
USP32	1627.4	0.827734	0.0613318	1.92459e-06
NSUN2	1621.59	-0.820858	0.0597068	2.00361e-06
CCND1	1104.65	-0.877181	0.0739948	2.03026e-06
AAK1	1338.65	0.857314	0.0689886	2.08373e-06
DOCK6	709.329	0.914328	0.0839024	2.25378e-06
SKA2	745.995	-0.94663	0.0923818	2.34362e-06
BRI3	1456.32	0.863904	0.0713966	2.43634e-06
UPK3B	299.208	-1.08608	0.128356	2.46812e-06
ATG4A	255.052	1.08087	0.127034	2.49991e-06
OCIAD2	2338.83	0.826022	0.0617825	2.53194e-06
STAP2	648.588	0.964141	0.097231	2.59628e-06
HSPA13	1099.02	0.927077	0.0877333	2.62848e-06
PHC3	2139.4	0.80871	0.0574618	2.72627e-06
SH3BGRL	550.802	-0.967296	0.0982025	2.79201e-06
TPPP3	1913.45	0.843961	0.0666193	2.89132e-06
CCDC34	572.421	-0.934548	0.089928	2.92485e-06
MYDGF	781.227	0.88771	0.077908	2.95853e-06
ZNF449	353.232	1.02716	0.113879	2.9926e-06
PI3	189.284	1.17195	0.151195	3.02673e-06
ADM	136.75	1.29298	0.182503	3.09565e-06
RAD54L	366.762	1.01748	0.11181	3.23757e-06
CCDC9B	1114.74	0.889368	0.0787853	3.27422e-06
AQP3	841.047	-0.882874	0.0771931	3.31153e-06
SNRPD1	645.106	-0.909088	0.0842602	3.3886e-06
RWDD2A	227.918	1.09335	0.132285	3.42846e-06
ZDHHC18	1058.76	0.864502	0.0727445	3.46833e-06
NT5C3A	2399.87	0.787573	0.0527257	3.50814e-06
RNF187	1375.99	0.837445	0.0657721	3.58873e-06
GJC2	433.722	-0.969506	0.100245	3.62954e-06
AHCYL1	4934.12	0.760225	0.045772	3.67154e-06
OTUD3	456.556	0.959833	0.0979329	3.7137e-06
DNM2	6409.2	0.749327	0.0429517	3.75601e-06
ARPIN	809.132	-0.891894	0.0802314	3.84065e-06
ARAP1	2546.18	0.783706	0.0519536	3.88303e-06
DVL2	685.452	0.906847	0.0843791	4.01456e-06
STK38L	1287.47	-0.854508	0.0709143	4.06136e-06
CFAP44	628.997	-0.942896	0.0943634	4.10968e-06
ABTB1	470.469	0.981665	0.104713	4.20765e-06
RAB40B	335.43	1.00838	0.111821	4.25715e-06
SKA3	1434.65	-0.8482	0.0695689	4.30715e-06
TMEM259	1659.79	0.823132	0.0633094	4.62319e-06
GOLT1A	274.476	1.06892	0.128669	4.67769e-06
MRGBP	1336.03	0.822072	0.0630795	4.73267e-06
PTPN23	719.445	0.912956	0.0872778	4.78777e-06
TMEM53	231.146	1.08222	0.132571	4.89984e-06
PI4K2A	385.269	0.995198	0.109432	4.95691e-06
PPP1R11	1257.29	0.834796	0.0666986	5.01464e-06
MCCC2	2545.1	-0.781273	0.0524214	5.07251e-06
STX1A	735.625	0.921988	0.0901174	5.13153e-06
IGSF8	390.516	0.985566	0.107223	5.19139e-06
C1orf131	304.346	-1.02051	0.116821	5.37565e-06
ACADM	642.672	-0.913373	0.0881784	5.4382e-06
VEGFA	11369.8	0.79913	0.0576664	5.69338e-06
APOBEC3B	150.006	1.19591	0.164533	5.75849e-06
SLC45A4	2564.61	0.788657	0.0549372	5.89107e-06
CD9	2059.76	0.88381	0.0806493	5.95805e-06
SSB	2119.98	-0.804362	0.0593496	6.09633e-06
CRABP2	4194.36	0.783646	0.053967	6.52711e-06
LEMD2	760.154	0.872258	0.0780836	6.6745e-06
CTDSPL	1571.77	-0.826781	0.0659428	6.82793e-06
EPC2	940.842	-0.867641	0.0771655	6.90639e-06
CRIP2	1694.89	0.797777	0.0582458	7.14745e-06
H2BC4	51.6506	1.61525	0.282931	7.48261e-06
TRIM3	385.391	0.979565	0.10837	7.56761e-06
PITX1	346.353	0.993851	0.112309	7.65267e-06
PSPC1	1305.52	-0.822119	0.0651449	7.73772e-06
NR1H2	1126.96	0.885011	0.0825058	7.82398e-06
SMPD3	632.538	0.944215	0.0990338	8.17512e-06
UGCG	1020.75	0.870916	0.0790577	8.80701e-06
SNRPD3	602.335	-0.913896	0.0915303	9.19507e-06
ATP2A3	961.64	0.849333	0.0736636	9.29778e-06
B4GALT5	2422.25	0.827949	0.0677309	9.40093e-06
GPX8	386.145	-0.963123	0.105622	9.61011e-06
KIFC2	308.216	1.01392	0.119812	9.71595e-06
TSPAN12	390.682	-0.969966	0.107917	1.0267e-05
PKP2	1160.68	-0.833149	0.069588	1.0378e-05
TOLLIP	1325.58	0.812419	0.0637774	1.04889e-05
SSH2	742.296	0.894697	0.0868627	1.06e-05
GUCD1	1608.4	0.815956	0.065075	1.12872e-05
PTPRB	997.137	-0.837243	0.0711942	1.17629e-05
BCL9L	2558.09	0.773424	0.0532489	1.18848e-05
ANGEL2	411.732	-0.943657	0.101391	1.20072e-05
PHF20L1	3553.3	-0.754835	0.0480461	1.22536e-05
LTV1	260.276	-1.04234	0.129546	1.27521e-05
RLIM	2404.17	0.785096	0.0567188	1.30032e-05
LDHA	21901.9	0.996742	0.116893	1.33859e-05
LINC00514	748.932	0.899817	0.0893932	1.36423e-05
MIPEP	552.469	-0.923068	0.0962201	1.40328e-05
PCCA	662.591	0.901504	0.0901587	1.41663e-05
GDF15	8089.1	1.07614	0.139925	1.42999e-05
KIF15	648.185	-0.883998	0.085203	1.44337e-05
CPSF6	1577.64	-0.839998	0.0727035	1.47023e-05
EAF2	97.4318	1.32464	0.211671	1.53913e-05
ZNF780B	875.367	-0.88259	0.0855142	1.61139e-05
BRIX1	886.812	-0.873567	0.0830367	1.62647e-05
PERP	4932.47	0.785366	0.0576671	1.64156e-05
IFNGR2	886.345	0.840734	0.0736011	1.65663e-05
CAST	4000.11	0.758387	0.0501461	1.71877e-05
ITFG2	415.651	-0.935425	0.101384	1.73488e-05
SYVN1	1453.44	0.804741	0.063803	1.81785e-05
FBP1	486.823	-0.907668	0.0937873	1.88548e-05
NHSL1	928.645	-0.857372	0.0792414	1.9196e-05
CHAC1	1247.64	-0.837529	0.0737641	1.95546e-05
ZC3H4	1065.66	-0.856504	0.0794004	1.97376e-05
STING1	331.918	-0.982813	0.11639	1.99217e-05
RBM12	2060.93	-0.777385	0.0563255	2.02917e-05
MORF4L2	5876.11	0.754542	0.0497387	2.06677e-05
CCNO	144.145	1.17127	0.171973	2.08572e-05
BOK	855.799	0.877841	0.0859548	2.10478e-05
SDHAF3	174.464	-1.11235	0.15495	2.16264e-05
MAT2A	7564.24	-0.734556	0.0439539	2.1819e-05
PGAP6	1789.89	0.782386	0.058074	2.22075e-05
WDR3	1000.53	-0.847814	0.0774316	2.24061e-05
NFYB	610.809	-0.878198	0.0864879	2.28076e-05
ALAS1	950.303	0.850867	0.0784552	2.30097e-05
LMBR1L	489.67	0.940131	0.105059	2.34224e-05
ERLEC1	1507.97	0.79659	0.0627456	2.3637e-05
FAM83D	710.172	-0.884449	0.0888094	2.38519e-05
HEATR1	1419.93	-0.823972	0.0708966	2.40674e-05
COQ3	174.035	-1.09398	0.151071	2.42841e-05
NUPR1	415.84	0.953268	0.10956	2.53842e-05
RHOQ	733.407	0.856825	0.0809309	2.5608e-05
TMEM184B	1360.35	0.801785	0.0646037	2.6285e-05
ASNS	483.849	0.912535	0.0976887	2.69648e-05
PER2	526.965	-0.890352	0.0911711	2.71951e-05
AP2A1	2201.8	0.777415	0.0574656	2.74256e-05
PKP3	1898.45	0.777755	0.0575867	2.76569e-05
TNFRSF10D	242.97	1.01827	0.129478	2.7889e-05
THEM4	400.684	-0.927058	0.102825	2.88541e-05
H2AZ2	3244.51	-0.763982	0.0539242	2.91099e-05
CKAP2L	792.218	-0.85774	0.082292	2.93703e-05
RAC2	245.17	1.02169	0.131902	2.9897e-05
PSMB10	209.846	1.0476	0.139755	3.01609e-05
PRRG4	349.872	0.955028	0.111832	3.06893e-05
PRKDC	9805.78	-0.732629	0.0446485	3.14848e-05
XAB2	608.777	0.87891	0.0888802	3.175e-05
RAB5B	3408.33	0.760472	0.0531686	3.28201e-05
PYROXD1	603.186	-0.890795	0.0927514	3.33664e-05
CYP1B1	413.421	0.946127	0.10978	3.41995e-05
SLC22A3	326.054	0.963492	0.115248	3.44852e-05
PIM2	242.681	1.01389	0.130656	3.47724e-05
ZNF33B	1671.98	-0.787426	0.0617045	3.50611e-05
H2AC6	739.691	0.85982	0.0837808	3.535e-05
HPGD	317.094	-0.963748	0.115652	3.56446e-05
MYB	653.356	-0.88132	0.0908158	3.65557e-05
POLE3	1518.43	-0.815874	0.0709123	3.71791e-05
HNF4G	1075.71	-0.819516	0.0723288	3.91034e-05
SFTA2	122.645	-1.1654	0.179282	3.9769e-05
MAX	711.666	0.847098	0.0811974	4.11374e-05
PRR5L	1786.11	0.778102	0.0600015	4.21979e-05
CHPT1	480.673	-0.908903	0.100753	4.29172e-05
EPAS1	1422.4	0.790092	0.0638548	4.36413e-05
C5orf63	390.618	-0.942275	0.111244	4.4004e-05
DDX1	2462.19	-0.785328	0.0623917	4.4367e-05
DGKE	821.238	0.825146	0.0748084	4.47306e-05
GNPNAT1	731.695	-0.840633	0.0797873	4.72931e-05
NIPA1	1636.43	0.783101	0.0618567	4.80333e-05
GPR137B	160.098	1.09276	0.158591	4.84046e-05
PRICKLE3	259.294	1.014	0.134054	4.87774e-05
MT2A	198.554	-1.05403	0.146764	4.95333e-05
COQ2	398.25	-0.912044	0.102355	4.99117e-05
HYLS1	187.888	-1.06706	0.151106	5.0297e-05
ANKEF1	320.021	-0.959205	0.117313	5.10669e-05
MAP3K2	2643.71	0.764995	0.0567355	5.22534e-05
UTP6	1741.66	-0.790177	0.064724	5.30735e-05
COA7	614.197	-0.862796	0.0876603	5.34862e-05
GAN	273.36	1.0184	0.136828	5.43148e-05
BMS1	1420.07	-0.786589	0.0636644	5.51435e-05
NDUFC2	355.974	-0.972063	0.122294	5.55601e-05
ROCK2	5266.44	-0.741924	0.0496551	5.68218e-05
BCL6	503.172	0.898059	0.0990761	5.76662e-05
CEP55	1493.15	-0.781407	0.0624543	5.8959e-05
NAIF1	227.455	1.01528	0.137125	5.98582e-05
RRN3	1417.54	-0.790767	0.0657024	6.16912e-05
TSC1	1069.68	0.799377	0.0688582	6.55005e-05
SGK2	756.365	0.851225	0.08563	6.69811e-05
GEMIN5	376.463	-0.954637	0.118959	6.74808e-05
KMT5C	705.101	0.843079	0.0830937	6.79824e-05
CASP6	373.623	-0.90974	0.104872	6.9525e-05
UXS1	1077.53	0.823813	0.0771864	7.00463e-05
SERTAD2	1363.29	0.845104	0.0840735	7.05674e-05
NUP35	293.112	-0.978706	0.127301	7.10901e-05
CLK1	3236.55	0.773439	0.0610104	7.21466e-05
TMEM54	2317.31	0.769952	0.0600066	7.32212e-05
HMGN3	327.025	-1.01398	0.139189	7.37617e-05
TMEM189	663.144	0.872888	0.093701	7.8151e-05
C6orf136	315.337	0.938331	0.115109	7.92646e-05
RAET1L	105.597	1.20352	0.201622	8.03865e-05
CEACAM1	3397.46	0.735882	0.0492465	8.26519e-05
TRIM21	716.12	0.876329	0.095079	8.32173e-05
CDT1	851.879	0.819622	0.0765921	8.43481e-05
TAF1A	276.921	-0.985387	0.130888	8.49223e-05
IGF1R	1507.82	0.812119	0.0742763	8.60713e-05
ATP2C2	1620.92	-0.807094	0.0730416	8.90887e-05
TTPAL	657.918	-0.858694	0.0902626	9.28025e-05
METTL1	132.046	-1.11751	0.175728	9.34294e-05
ATIC	1889.98	-0.756386	0.0565968	9.40594e-05
TESK1	428.181	0.893743	0.102042	9.65891e-05
LDLR	3004.32	1.03037	0.147252	9.72248e-05
SEC61B	1024.72	0.799246	0.0712067	0.000100487
PHGR1	343.179	-0.954254	0.122758	0.000101157
CAPG	3685.15	0.752697	0.0559309	0.000102532
EFHD2	2009.45	0.75737	0.057577	0.000104623
BAZ2A	5724.14	0.744691	0.0533892	0.00010673
ZFAND2A	345.757	0.927179	0.114483	0.000108145
DLAT	1041.78	-0.798358	0.0713985	0.000108855
PARD3	1815.09	0.77373	0.0632235	0.000111704
TXNL4B	337.381	-0.937226	0.118117	0.000113139
PLIN3	566.596	0.850883	0.0893544	0.000114608
SESN1	417.551	-0.901864	0.106963	0.000116125
PMPCA	1688.01	0.762643	0.0601875	0.000116923
TULP3	598.31	0.842823	0.087356	0.00011772
MTHFD1	1090.89	-0.802625	0.0738197	0.00011933
ZHX2	683.066	0.832179	0.0838639	0.000120136
LRRCC1	270.936	-0.945578	0.12248	0.000122576
POFUT2	689.312	0.825382	0.0817739	0.000125862
MRPL20	711.542	-0.824334	0.0815082	0.000127519
ITGB6	776.795	0.812418	0.0776822	0.000130048
CYTH1	973.257	0.819938	0.0803324	0.000130909
C1QBP	1324.09	-0.776793	0.065587	0.000131769
ZBTB38	1215.9	-0.809619	0.0768436	0.000132632
JDP2	547.385	-0.844594	0.088949	0.000134373
APOH	952.145	0.798468	0.0732285	0.00013614
STX5	1480.1	0.788129	0.0698476	0.000141507
TEAD2	440.892	-0.885502	0.103449	0.000142416
SEPHS1	1280.64	-0.771108	0.0640747	0.000143325
MSANTD3	426.304	0.914536	0.113838	0.000149752
ARHGAP29	6627.98	-0.924118	0.117205	0.000150689
SLC41A1	673.365	0.82304	0.0824252	0.000152592
FASTKD2	881.581	-0.810979	0.078312	0.000154504
QPRT	404.461	-0.885352	0.104247	0.000156445
CDCA8	961.157	-0.789516	0.0710455	0.000157422
FBXL3	739.079	-0.825176	0.0835883	0.000158417
PDIA5	533.302	0.846375	0.0909661	0.000159411
CRB3	425.386	0.876845	0.102091	0.00016752
MTRES1	179.595	-1.01827	0.151704	0.000170649
ARHGAP27	2047.8	0.745844	0.0563406	0.000171694
LEO1	957.53	-0.793105	0.0729442	0.000172745
SYT8	297.957	-0.951107	0.128328	0.000173796
NIT1	723.529	0.826119	0.0846519	0.000176974
KCNE3	752.339	-0.829056	0.0857434	0.000178044
HK1	2368.73	0.745272	0.0563694	0.000180194
TUBA1B	2417.68	-0.746815	0.057041	0.000182371
VPS36	1415.25	-0.774924	0.0671851	0.000184639
PLSCR1	3514.92	1.02262	0.154878	0.00018805
ADAR	8671.64	0.734439	0.0529968	0.000192637
ZNF552	558.507	-0.834331	0.0884368	0.000193793
MICALL1	817.632	0.827925	0.0861851	0.000196103
TTBK2	761.187	0.81371	0.0811628	0.000198416
PRMT5	572.798	-0.853284	0.095243	0.000199575
IHH	159.785	-1.0334	0.159418	0.00020075
TIPARP	2129.51	0.779827	0.0695103	0.000210271
RHOC	2622.89	0.748518	0.0584518	0.000211495
MUC13	7122.06	0.720662	0.0485406	0.000213958
PDLIM7	681.359	0.860227	0.0985331	0.000215197
SF3A3	1699.2	-0.751105	0.0595099	0.000216442
SURF4	4526.49	0.716783	0.0472213	0.000217687
NOP16	317.925	-0.926041	0.12221	0.000220176
VWA8	1264.66	-0.770522	0.0666042	0.000223953
SIAE	622.894	-0.825934	0.0865853	0.000226487
DIS3L	393.222	-0.907944	0.116058	0.000227758
BCLAF1	2266.15	-0.754502	0.0610832	0.000230339
CDKN2D	178.186	1.01103	0.153544	0.000231641
IFT122	611.221	-0.820626	0.0850626	0.000235587
CD82	3068.41	0.726621	0.0511562	0.000236908
C17orf75	525.065	-0.837187	0.0911419	0.000240881
SMIM10L1	479.353	-0.849279	0.0955439	0.00024221
CLRN3	428.274	-0.868488	0.102722	0.0002449
NPDC1	1470.68	0.77531	0.0692663	0.000254573
ZNF711	392.473	-0.898477	0.114219	0.000261595
LRP10	2562.89	0.731087	0.0532943	0.000264429
ARHGEF10L	1602.22	0.753832	0.0616463	0.000265858
LAMP2	2142.25	0.735383	0.0552753	0.000277626
RNF11	1046.06	0.782075	0.0724545	0.000279134
NAGLU	486.787	0.849427	0.0972818	0.000285175
FBXW7	689.158	0.820912	0.0870229	0.00028976
GTF2A1	595.749	-0.821106	0.0872716	0.000297499
NR1D1	883.7	1.05146	0.172699	0.000302238
RHOG	693.271	0.803864	0.0810443	0.00030382
C4BPB	174.78	1.01637	0.159813	0.000306988
LRIG1	611.25	-0.82386	0.0887412	0.00031339
ZNF516	589.292	0.821733	0.0879868	0.000315013
ZNF579	398.461	0.871178	0.106474	0.000318279
RARRES1	166.694	-1.02676	0.164451	0.000319922
ALS2	1113.59	0.775116	0.0708994	0.000326531
RABAC1	236.028	0.945392	0.134422	0.00033151
TUBGCP5	387.842	-0.877183	0.109113	0.00033651
FAM193B	714.289	0.820095	0.0878355	0.000338187
SLC35A1	374.838	-0.866942	0.105362	0.000339865
KIF20B	1502.81	-0.756752	0.0641895	0.000341542
AHDC1	750.536	0.797076	0.0792809	0.000343222
CLDN12	4132.7	0.76272	0.0664817	0.000346595
UTP14A	751.382	-0.795752	0.078888	0.00034998
GTF2H3	798.417	-0.801522	0.0813199	0.000355149
RBM3	3046.16	-0.7407	0.0585743	0.000363869
ZNF180	260.982	-0.923745	0.127734	0.000367411
TOMM40	1430.77	-0.761019	0.0664117	0.000370989
FILIP1L	373.928	-0.89323	0.116471	0.0003746
SEC24C	1342.05	0.752797	0.063447	0.000378235
BRWD3	1419.36	0.75948	0.06603	0.000380065
LXN	200.471	-0.960138	0.142007	0.000381899
IFI27L1	197.731	0.971238	0.146663	0.00039673
NDC1	1486.77	-0.74797	0.0619066	0.000398601
PDCD11	1388.66	-0.756704	0.0653857	0.000402406
AP5B1	673.031	0.800947	0.08232	0.000410066
RIPK3	323.392	0.875593	0.110941	0.000413923
ERP44	1568.36	0.746796	0.0617831	0.000415862
CDC27	1068.92	-0.777847	0.073685	0.000419752
CCDC137	503.027	-0.865303	0.107243	0.000421719
HMGB1	5258.43	-0.729524	0.0554074	0.000425697
CIP2A	1105.81	-0.774146	0.0725598	0.000429698
RFXAP	199.432	-0.966537	0.14636	0.0004317
PLIN4	521.459	0.82456	0.0919251	0.000433704
MRPL15	705.797	-0.836072	0.0965134	0.000435736
CDC42BPB	1830.65	0.739806	0.059523	0.0004398
HMGB2	4351.74	-0.72539	0.054053	0.000443884
RPN1	8506.34	0.709209	0.047901	0.000448027
IFT74	351.262	-0.871582	0.110767	0.000452233
LTO1	492.332	-0.824437	0.0926269	0.000456468
CFAP97	1168.56	-0.770699	0.0719027	0.000458603
E2F8	412.995	-0.857344	0.105479	0.000460742
WDTC1	1245.65	0.757378	0.0667747	0.00046288
C5orf24	834.897	-0.792374	0.0803428	0.00046502
XPA	180.478	-0.970199	0.149705	0.000469365
NUP54	1103.57	-0.762285	0.0689343	0.000473754
CCNJ	256.761	-0.916616	0.129054	0.000480354
MYORG	1099.54	-0.771207	0.072664	0.000484853
FRY	2692.29	0.725032	0.0547192	0.000491647
RNF169	840.56	0.808156	0.0872051	0.000493914
MYO5C	1748.13	-0.733923	0.0582129	0.000496184
PKN1	1503.54	0.743154	0.0618328	0.000498454
CCSER2	799.296	0.807915	0.0872873	0.000514401
PLD3	1427.16	0.75817	0.0679095	0.000519012
SEL1L3	5676.19	0.709876	0.0490297	0.000525967
ATP6V1E1	1389.92	0.777277	0.0754852	0.000528287
HKDC1	3357.09	0.75733	0.0677118	0.000532939
TGFB1	487.419	0.82402	0.0941086	0.000535308
ARHGEF3	373.555	0.868679	0.111707	0.000537678
GOLGA3	2012.6	0.73029	0.0572342	0.000540051
DSTN	4880.53	0.712847	0.0504039	0.000542436
NCOA3	2690.88	0.719624	0.053097	0.000547212
PLP2	866.982	0.785327	0.0792901	0.000556921
PHF14	1154.08	-0.755915	0.067661	0.000559371
DTX3L	3549.3	0.916991	0.131675	0.000566786
MTBP	841.581	-0.778702	0.0768785	0.000569278
SDAD1	1082.41	-0.773993	0.0752167	0.000589388
SH3RF1	1396.11	0.772815	0.0747886	0.000591924
C5orf34	252.605	-0.900832	0.125776	0.000596993
ZSWIM6	743.51	0.79418	0.083535	0.000609791
RDH10	789.6	0.785211	0.0799736	0.000612371
CRY1	533.978	0.817422	0.0928457	0.00061495
TRIB1	4455.6	-0.718186	0.053215	0.000617528
CEP85	1079.13	0.762084	0.0708055	0.000620121
DECR1	437.948	-0.83406	0.0995941	0.000622714
CLGN	212.788	0.953707	0.147799	0.000633181
LAP3	1724.63	0.769567	0.0742837	0.000646587
ALG8	777.229	-0.779212	0.0781799	0.000649292
DHX37	473.364	-0.824537	0.0965164	0.000652015
SYNCRIP	4092.89	-0.705747	0.0490366	0.000674429
PROCR	1107.89	0.754695	0.0694066	0.000709718
SERP1	4615.68	0.708079	0.0503552	0.000712715
MT-CO3	124952	-0.727461	0.0584208	0.000724805
OSER1	2117.28	0.763731	0.0733549	0.000727862
FOXA3	329.674	-0.861533	0.113607	0.000730941
IFI27	3286.58	1.02099	0.179434	0.000734058
TUBB4B	4825.67	-0.6959	0.0459262	0.000746822
GRK5	415.827	0.839761	0.105835	0.00077303
ARF1	8294.92	0.693243	0.0450442	0.000792917
UVSSA	964.814	0.763597	0.0743138	0.000796235
WDCP	244.935	-0.911973	0.136157	0.000799571
CCDC125	429.354	-0.828663	0.101489	0.000806242
RAB17	1076.87	0.75952	0.0726949	0.000809574
GPR137	373.396	0.836889	0.104986	0.000812919
SBSPON	1056.75	-0.750031	0.0688851	0.000823001
DDX10	765.447	-0.778105	0.0807125	0.000829784
CA2	352.752	0.894479	0.129459	0.000833201
HECA	657.202	0.787101	0.0845907	0.000836627
TRABD	558.548	0.806926	0.0929076	0.000840056
DPY19L1	879.82	0.768409	0.0768453	0.000843501
USP1	1993.68	-0.751118	0.0696222	0.00084695
SH2D4A	912.232	-0.772162	0.0785705	0.000850438
FNDC3A	2779.21	0.709438	0.0522601	0.00085393
SKP2	665.011	-0.837695	0.106156	0.00085743
DENR	1878.82	-0.731953	0.0618755	0.000868032
MAGT1	2360.14	0.724098	0.0586698	0.000871618
ITGB4	8957.63	0.69137	0.0449422	0.000882445
OSTC	1573.64	0.737403	0.0644244	0.000896922
PAICS	5253.96	-0.693083	0.0457355	0.000904178
ACTN1	2918.33	0.71106	0.0533454	0.000907815
SEC23A	1349.88	0.751605	0.0705134	0.000911455
RAB32	151.216	0.985331	0.169977	0.000937241
DNPH1	242.339	-0.917636	0.141325	0.000940957
WDR4	145.004	-0.976372	0.167371	0.000967721
DPP9	1118.96	0.741624	0.0675731	0.00100374
CCP110	555.212	-0.793404	0.0899907	0.00101192
LCN2	4580.74	0.747488	0.0701707	0.001016
C1orf198	840.649	0.764966	0.0778159	0.00102829
EGLN2	455.72	0.808694	0.0967579	0.00103241
IFRD1	3193.8	0.734201	0.0645736	0.00103654
ATPSCKMT	290.076	-0.861964	0.119945	0.00104069
TMEM209	516.828	-0.794605	0.0913035	0.00106599
C2CD5	1400.43	-0.728415	0.0625776	0.00108327
LIPE	454.081	0.830715	0.107269	0.0010876
FDX1	251.981	-0.891156	0.133729	0.00110061
VCP	5987.62	0.692669	0.0471279	0.00110939
LIPT2	133.122	-0.993493	0.179314	0.00112268
PNPLA6	458.043	0.806697	0.0974029	0.00113164
WDR36	1068.57	-0.750508	0.0727238	0.00113612
UMPS	886.91	-0.758753	0.0763548	0.0011406
ARAP2	1365.72	0.750484	0.0727438	0.00114508
CLDN9	105.043	1.02394	0.193337	0.00115869
SH3GLB2	2317.16	0.73504	0.0661579	0.00116325
HSF2	449.253	0.806105	0.0980915	0.00120499
SKA1	604.661	-0.780013	0.087008	0.00123371
ETNK1	1735.46	0.725552	0.0628301	0.00124837
RNF181	720.13	0.772857	0.0839998	0.00125329
MAOA	1699.15	-0.720049	0.0605684	0.0012632
PHF13	574.168	0.78439	0.0894769	0.00127322
FBXO46	1038.47	0.744486	0.0716404	0.00128327
PSME4	3461.55	0.711632	0.0568918	0.0012883
PCGF5	618.911	0.778827	0.0871388	0.00129336
SRSF1	934.297	-0.744073	0.0715303	0.00129841
POLR1B	781.15	-0.755527	0.0769969	0.00132393
UNC119	349.57	0.826129	0.109057	0.00133952
BAK1	412.456	0.846412	0.118369	0.00135521
TFE3	1759.65	0.744813	0.072541	0.00136052
KCNC3	601.244	-0.812472	0.103392	0.00136587
PAQR4	221.452	-0.888693	0.13878	0.00143634
UBE2C	2014.44	-0.706601	0.0555797	0.00144181
FAM98B	1013.75	-0.74315	0.0724944	0.00145289
MAP2K2	1296.2	0.728809	0.0660854	0.00147531
LANCL1	600.279	-0.775436	0.0876768	0.00149228
TRAK2	2421.03	-0.728874	0.0664163	0.00152088
SLC26A6	738.698	0.773508	0.0871029	0.00153239
QPCT	1806.77	0.743727	0.0734228	0.00154976
SLC50A1	1082.42	0.736589	0.0705051	0.0015792
OGFOD1	677.867	-0.768067	0.0852587	0.00159116
CHML	753.694	-0.75512	0.0792974	0.00160319
IRGQ	814.83	0.757828	0.0808005	0.0016275
ERI2	356.621	-0.81568	0.107865	0.00163361
CIC	2462.22	0.702153	0.0547917	0.00163972
ARNTL2	1232.02	0.733421	0.0694121	0.00164582
TOE1	212.447	-0.875254	0.1359	0.00167639
OIP5	172.66	-0.905537	0.150501	0.00170107
ZNF185	686.479	0.760124	0.0826841	0.00175791
PRR15	593.644	0.770401	0.087821	0.00177723
DENND5A	650.303	0.774838	0.0902032	0.00179028
PFKL	1879.34	0.705336	0.0572249	0.00180345
BCL3	441.934	0.807119	0.105661	0.00181005
LPCAT4	1276.9	0.725132	0.0668072	0.00183663
TNS2	1280.8	-0.747644	0.0777296	0.00188338
NFYC	815.214	-0.761615	0.084422	0.0018901
QTRT2	769.992	-0.749517	0.0786747	0.00189683
CDH17	312.303	0.824591	0.114717	0.00191033
AADAC	89.8764	-1.02569	0.211715	0.00194445
TRMO	220.151	-0.901169	0.152022	0.00195135
THNSL1	234.928	-0.865364	0.135054	0.00197217
PAK1IP1	446.411	-0.799822	0.103587	0.00197915
DUSP12	445.656	-0.788672	0.0985443	0.00202155
N6AMT1	279.127	-0.831342	0.11974	0.00205768
INSR	569.645	0.777249	0.093567	0.00207222
DLGAP5	936.895	-0.737112	0.0740375	0.00207949
FAM3A	968.862	0.738775	0.0750106	0.00210149
ANAPC4	406.738	-0.806171	0.107894	0.00210884
ZFAND3	1968.71	0.709806	0.0609064	0.00211619
BAHD1	1014.89	0.726827	0.0693775	0.00214583
LYPLAL1	299.13	-0.833424	0.12161	0.00215329
MAFF	762.503	0.790086	0.100449	0.00216076
UBXN6	1380.95	0.719026	0.0656992	0.00216825
PSMD5	1520.02	-0.711474	0.0620523	0.00218328
PPM1H	973.401	0.735724	0.0740831	0.00222102
MT-ND5	54449.1	-0.814749	0.113053	0.00222863
LY6E	2561.16	0.729807	0.0713969	0.00225917
SMC4	3813.2	-0.690374	0.0520883	0.00226693
MGST3	666.102	0.762916	0.0879586	0.00227469
MOSPD2	431.717	0.793471	0.103079	0.00228246
ZNF146	4276.44	-0.687885	0.0509303	0.00229026
STX4	474.152	0.793852	0.103424	0.00230588
ARL14	215.566	-0.871005	0.142003	0.0023374
TSEN15	894.342	-0.7445	0.0794018	0.00241678
MTRR	1088.33	-0.721024	0.0677974	0.00244069
CAPN10	581.274	0.776618	0.0955405	0.00244868
DPH5	374.585	-0.802929	0.108841	0.00245673
TIPIN	189.717	-0.870104	0.142481	0.0024648
BCL2L1	3630.47	-0.700772	0.0578889	0.00248096
HES1	617.654	-0.757659	0.086421	0.00250525
MAP3K3	390.254	0.805136	0.110228	0.00252146
LAMTOR5	813.626	0.752821	0.0840384	0.00252956
TUBG2	244.422	0.836997	0.12653	0.00255416
PGM1	678.424	0.755632	0.0858693	0.00257886
CKAP4	946.79	0.73337	0.0746776	0.00258714
ZNF614	514.415	-0.771252	0.0940808	0.00262876
LIPH	1448.06	0.7097	0.06314	0.00267111
PHTF1	465.846	0.784737	0.101193	0.00267961
GALK2	696.549	0.764325	0.0911571	0.00270541
SSR3	3703.74	0.686236	0.0515338	0.0027227
SLC25A37	1313.95	0.725921	0.0717411	0.00273137
RAB29	273.037	0.824547	0.12208	0.00275745
JAK1	3565.29	0.709792	0.0636544	0.00276618
S100A11	6299.15	0.680646	0.0489708	0.0028103
CALM2	7966.57	-0.680915	0.0492858	0.00282832
GATA2	809.388	-0.752482	0.0861675	0.00286443
PTPRH	4834.46	0.72216	0.0705875	0.00287348
CCDC9	623.629	0.74934	0.0846967	0.00289168
BAIAP2L1	3027.23	0.715371	0.067315	0.00292825
EZH1	777.472	0.739689	0.080019	0.00295579
CHMP6	145.951	-0.904845	0.165548	0.00296504
SSR1	2982.55	0.682902	0.0508092	0.00302077
DNASE1L1	608.272	0.761344	0.0915132	0.00303939
ST3GAL4	1392.59	0.722967	0.0716458	0.00304872
IFT88	706.98	-0.739523	0.0804302	0.00307696
EMSY	1065.16	0.717459	0.0691487	0.00312425
ARNTL	595.075	0.764761	0.093928	0.00314335
MYO7B	859.18	0.732677	0.0771978	0.00315291
AHR	733.163	-0.744522	0.0839768	0.00329785
HECTD1	4863.26	0.692489	0.0566345	0.00330767
ZADH2	953.438	-0.72114	0.0717346	0.00331748
JMY	1725.65	0.704887	0.0633361	0.0033373
ORC1	331.115	0.793249	0.110004	0.00334721
SIPA1L2	586.73	-0.757263	0.0911772	0.00338702
TFF1	27.8102	1.31842	0.38859	0.00339705
MRPS17	109.22	-0.938091	0.187332	0.00342726
CENPL	392.123	-0.783979	0.105698	0.00343738
C1orf109	402.661	-0.777683	0.102465	0.00346777
LARP7	788.298	-0.730703	0.0775324	0.00348808
GGT7	186.205	0.85924	0.146651	0.00354957
G0S2	422.503	-0.783988	0.106677	0.00358087
KLF3	2787.87	-0.682512	0.0523008	0.00359134
RHBDF1	3577.13	0.68907	0.0558719	0.00362275
SEC61G	810.644	0.774743	0.102311	0.00373896
DDRGK1	848.498	0.723762	0.0748339	0.00374959
GSTO2	538.609	-0.749948	0.0892785	0.00379245
UBE2Q2	1010.51	-0.713771	0.0697847	0.0038249
PUM3	900.76	-0.719873	0.0732098	0.00384662
PHF21A	913.067	0.725802	0.0768479	0.00392316
NET1	3010.84	-0.688975	0.0569356	0.00393442
WDR12	782.063	-0.736961	0.0832341	0.00394569
FNIP2	1144.22	0.70891	0.0679766	0.00400217
TSN	1397.82	-0.706223	0.0666593	0.00409291
SRSF4	1654.84	0.697826	0.0621282	0.00411572
APLP2	10171.4	0.670414	0.0470869	0.00412718
TRIP6	260.722	-0.809758	0.123906	0.0041501
PLEKHH3	589.881	0.753669	0.0930692	0.00416159
PCYT2	1380.9	0.69841	0.062873	0.00427772
TMEM268	269.277	-0.817848	0.129368	0.00430114
ITGB1	11184.9	0.671939	0.0483535	0.00431293
DAPP1	272.675	0.810692	0.126173	0.00436064
TMEM125	847.391	0.737348	0.0854713	0.00444525
FBXL12	386.744	0.777099	0.107887	0.00446965
C1orf210	593.891	0.737841	0.0859016	0.00449409
IQGAP2	1513.9	-0.69674	0.0628428	0.00451855
RASGRF2	645.088	-0.738713	0.0865046	0.00456753
HELLS	682.14	-0.731985	0.0829181	0.00466558
TRAPPC12	744.222	0.730352	0.0819977	0.00467787
ABHD3	468.538	0.771634	0.105484	0.00475176
AXIN2	959.327	0.721162	0.0772523	0.00477661
JMJD6	533.607	0.774484	0.107688	0.00482684
ATP13A2	874.786	0.730199	0.0826124	0.00483947
POLD1	907.416	0.718649	0.076154	0.00489016
TEF	631.628	0.737468	0.0870912	0.00491564
CAPN12	321.224	0.787764	0.11604	0.00492853
NEK2	983.696	-0.716062	0.0752518	0.00499345
